# Supplementary material for: Design, synthesis, and biological and computational evaluation of novel oxindole derivatives as inhibitors of Aurora A Kinase and SARS-CoV-2 Spike/Host ACE2 Interaction
Source: Research Square preprint supplement (doi:10.21203/rs.3.rs-3824919/v1), 2024-01-09

**SUPPLEMENTARY DATA**

**Design, synthesis, and biological and computational evaluation of novel oxindole derivatives as inhibitors of Aurora A Kinase and SARS-CoV-2 Spike/Host ACE2 Interaction**

Donatus B. Eni1,2*, Joel Cassel3, Cyril T. Namba-Nzanguim1,2, Conrad V. Simoben1, Ian Tietjen3, Ravikumar Akunuri3, Joseph M. Salvino3*, Fidele Ntie-Kang1,2,4*

1Center for Drug Discovery, Faculty of Science, University of Buea, Buea, Cameroon. 2Department of Chemistry, Faculty of Science, University of Buea, Buea, Cameroon.

3The Wistar Institute, Philadelphia, Pennsylvania, PA, USA

4Institute of Pharmacy, Martin-Luther University Halle-Wittenberg, Halle (Saale), Germany

*Corresponding author: [jsalvino@wistar.org](mailto:jsalvino@wistar.org) (JMS); [fidele.ntie-kang@ubuea.cm](mailto:fidele.ntie-kang@ubuea.cm) (FNK)

**Author ORCID**

Donatus B. Eni: 0000-0002-4148-6372

Joel Cassel: 0000-0001-8465-8739

Cyril T. Namba-Nzanguim: 0000-0002-8404-7214

Conrad V. Simoben: 0000-0002-5958-6961

Ian Tietjen: 0000-0002-8991-6490

Ravikumar Akunuri: 0000-0003-4898-5753

Joseph M. Salvino: 0000-0002-2184-5980

Fidele Ntie-Kang: 0000-0003-0795-394X


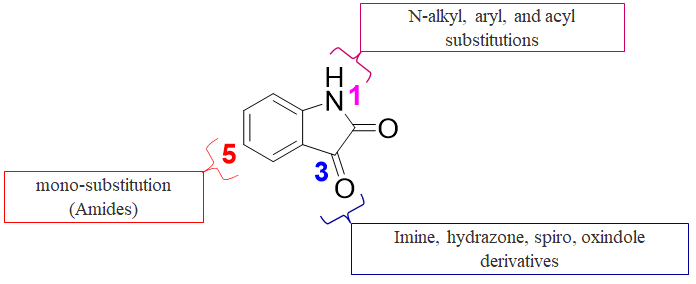


**Fig. S1:** The various targets modification positions on the isatin scaffold


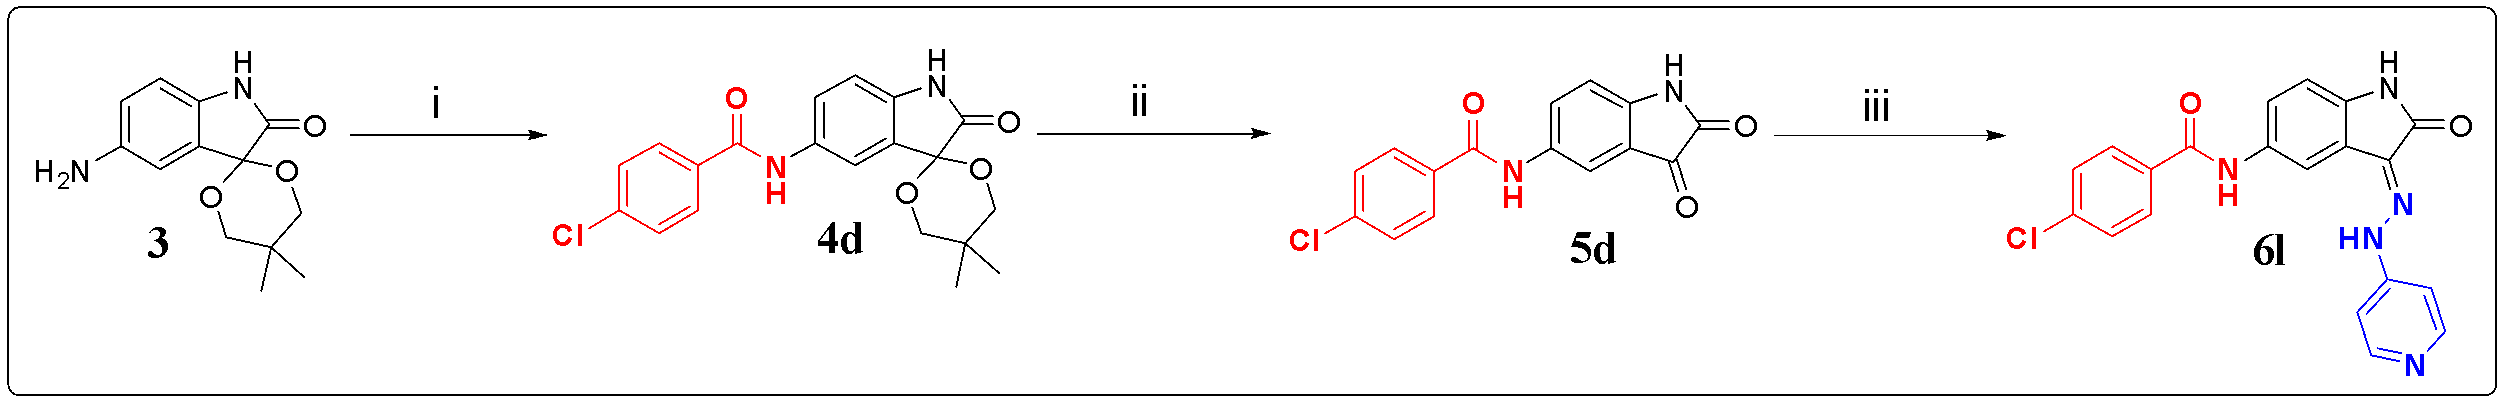


**Scheme S1:** Synthesis of compound **6m.**

**CODES IN THE LAB NOTEBOOK AND THE ARTICLE**

| **S/N** | **CODE IN LAB NOTEBOOK** | **CODE IN ARTICLE** |
| --- | --- | --- |
| 1 | DBE-01-023 or DBE-Glyol | 2 |
| 2 | DBE-01-025 | 3 |
| 3 | DBE-01-027 | 4a |
| 4 | DBE-01-045 | 4b |
| 5 | DBE-01-053 | 4c |
| 6 | DBE-01-033 | 4d |
| 7 | DBE-01-041 | 4e |
| 8 | DBE-01-031 | 6a |
| 9 | DBE-01-043 | 6b |
| 10 | DBE-01-037 | 6c |
| 11 | DBE-01-049 | 6d |
| 12 | DBE-01-051 | 6e |
| 13 | DBE-01-061 | 6g |
| 14 | DBE-01-063 | 6h |
| 15 | DBE-01-065 | 6i |
| 16 | DBE-01-067 | 6j |
| 17 | DBE-01-071 | 6k |
| 18 | DBE-01-069 | 6l |
| 19 | DBE-01-039 | 6m |

**C-13 NMR DATA**


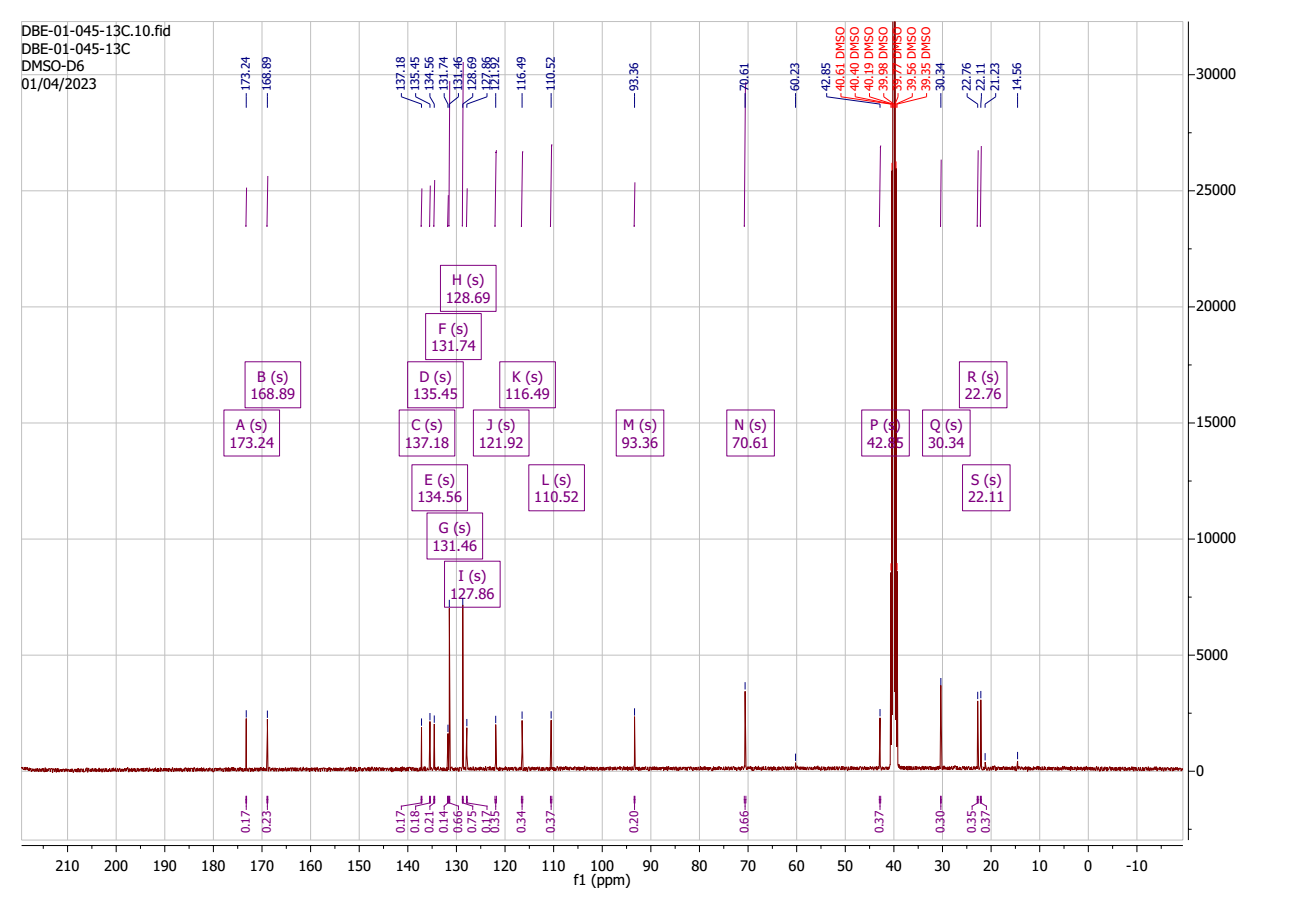


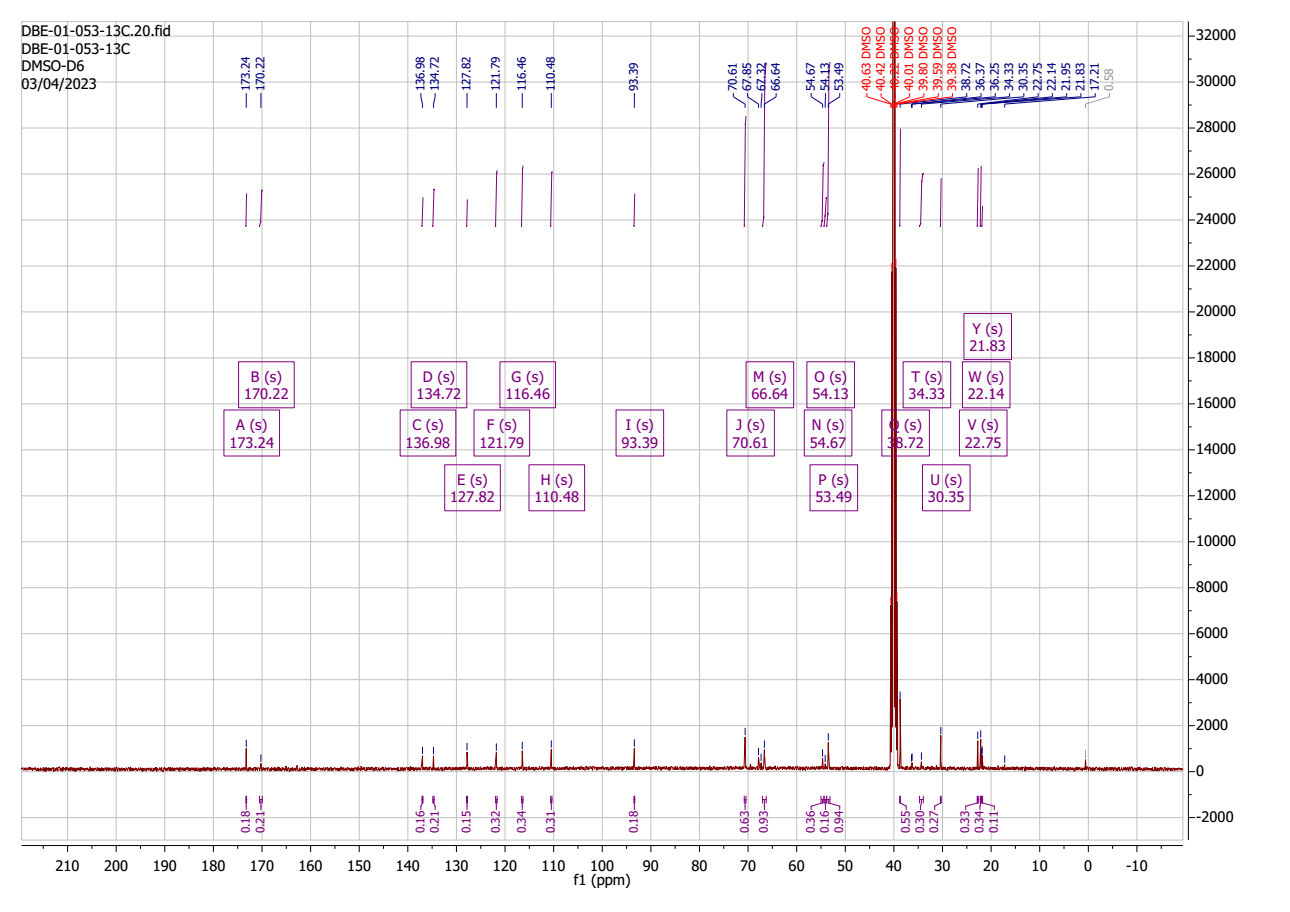


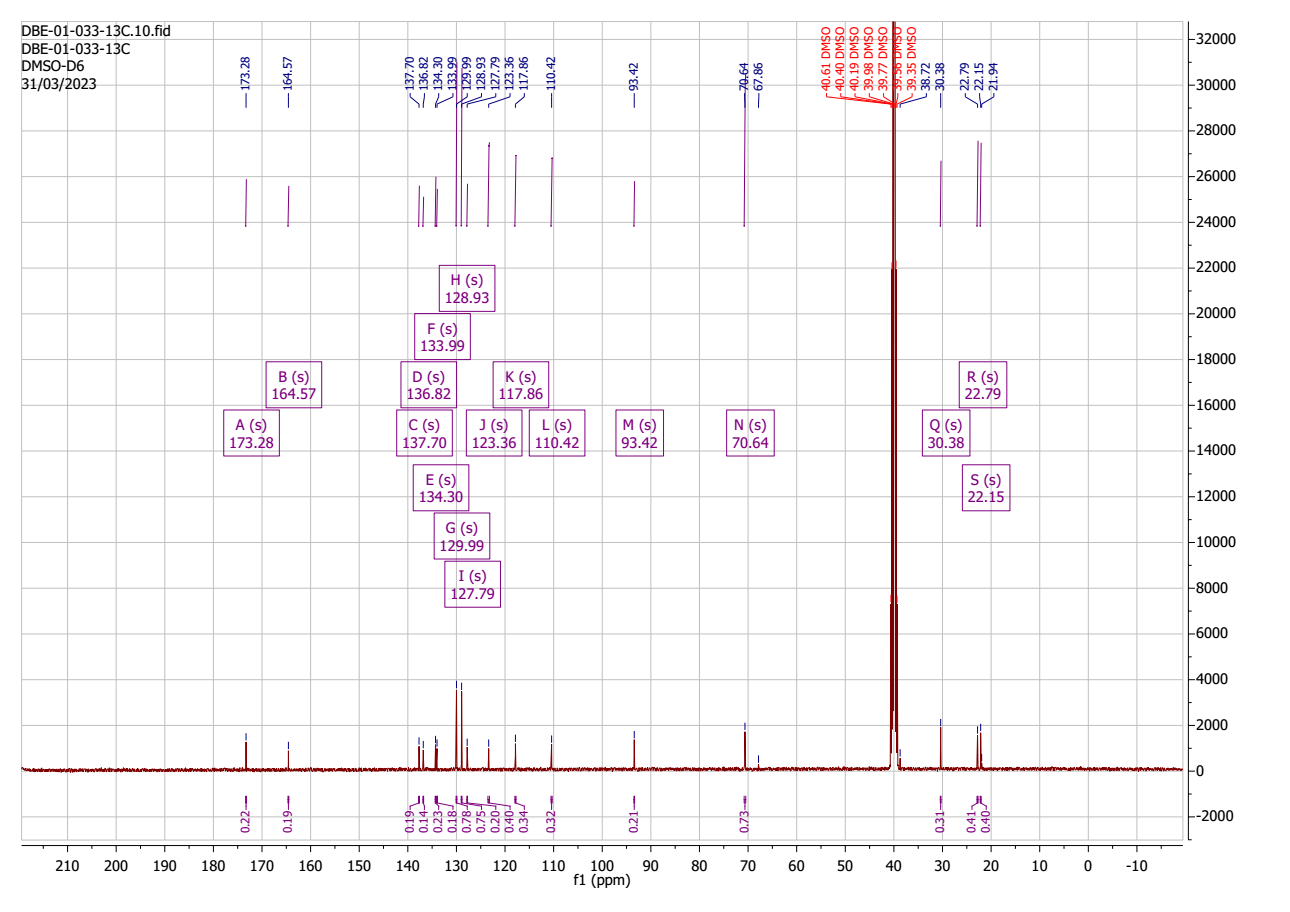

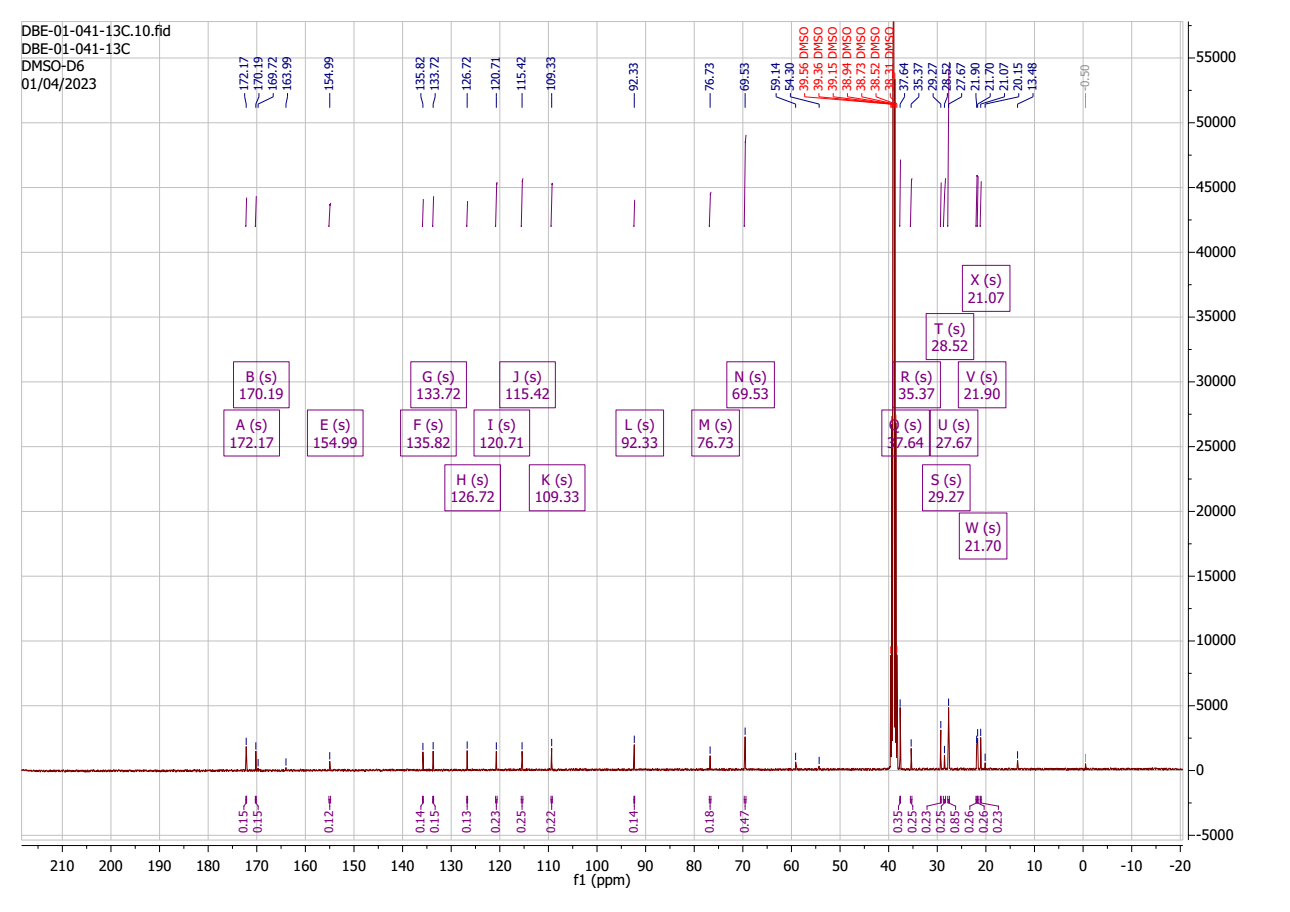


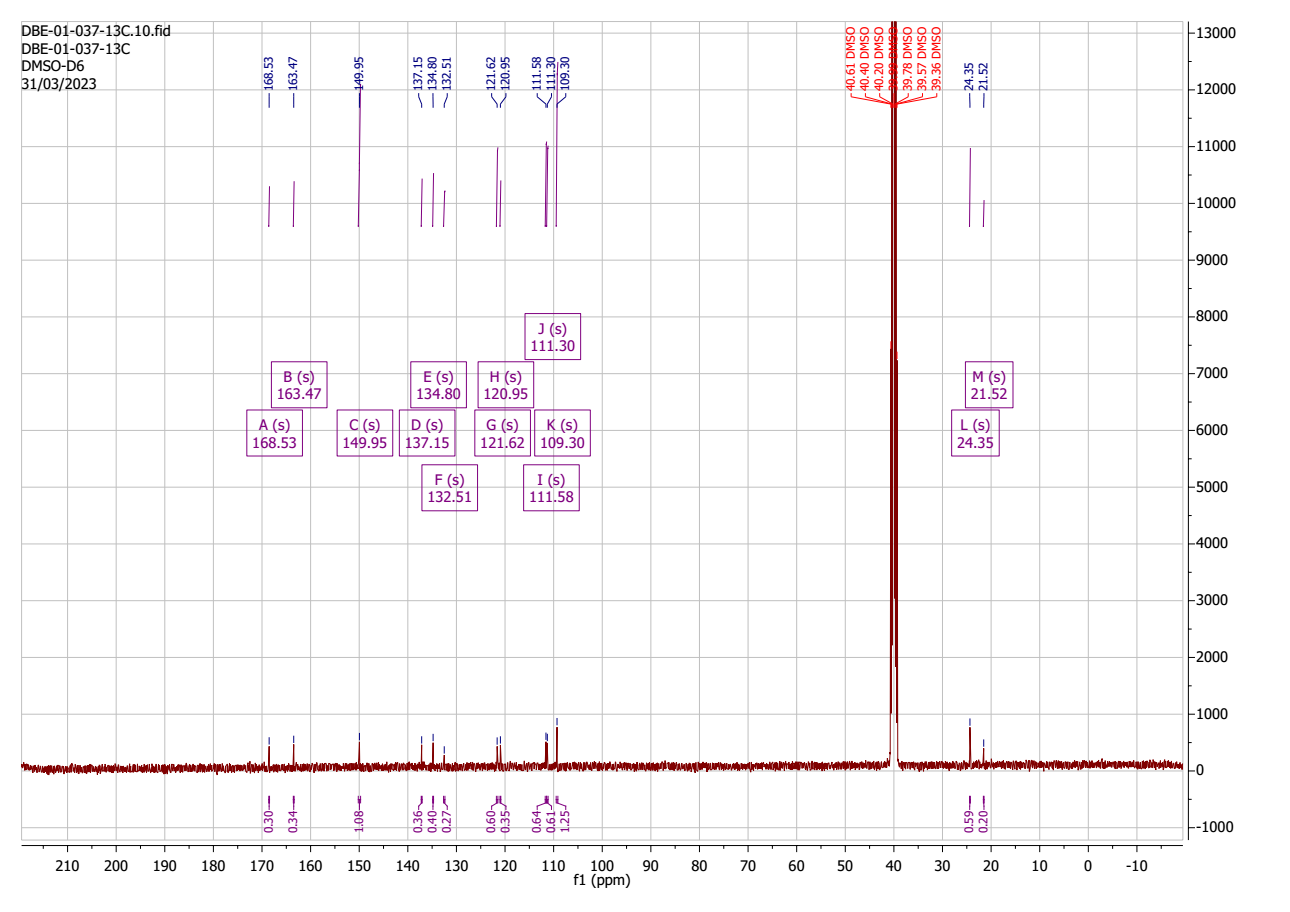


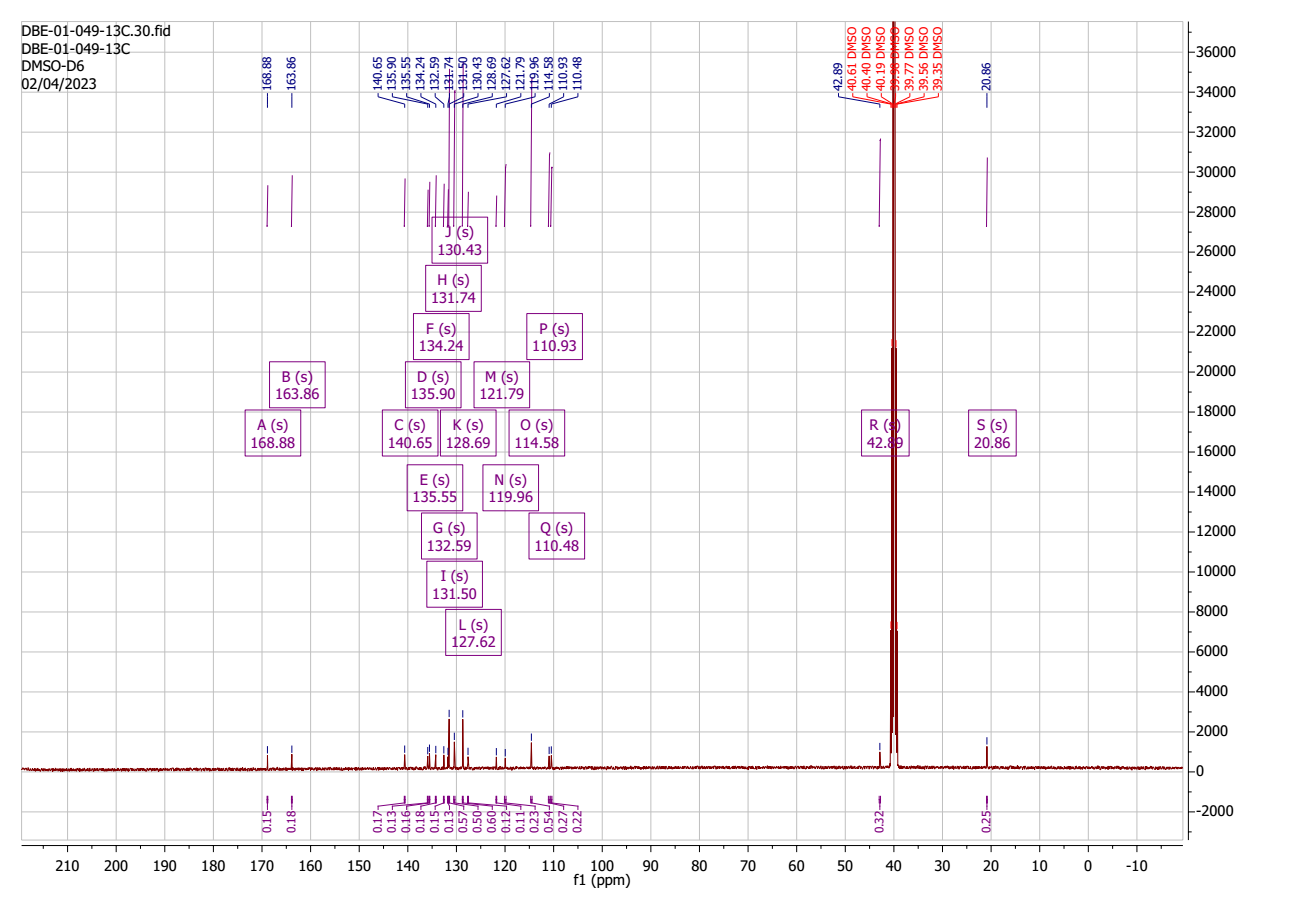


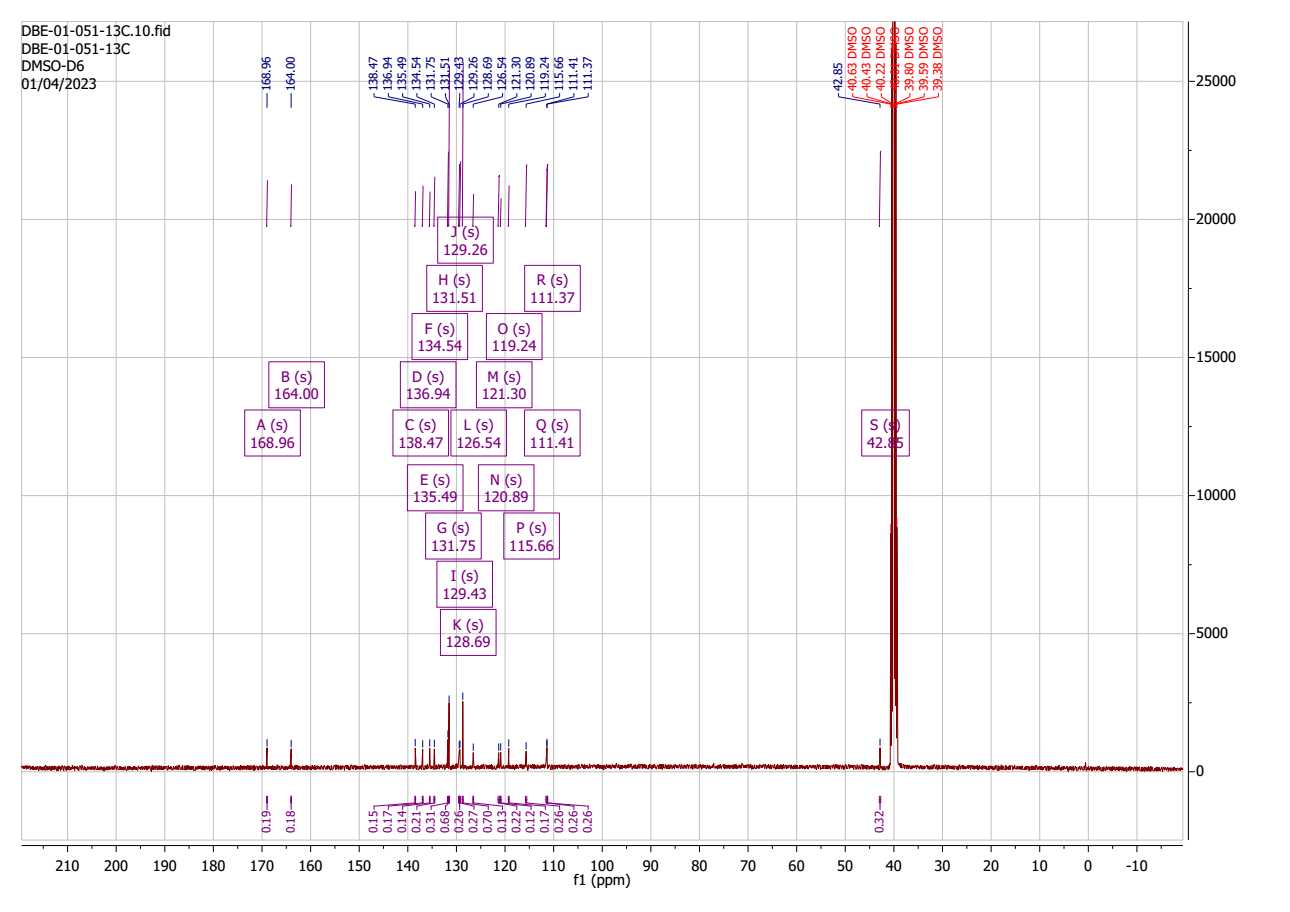


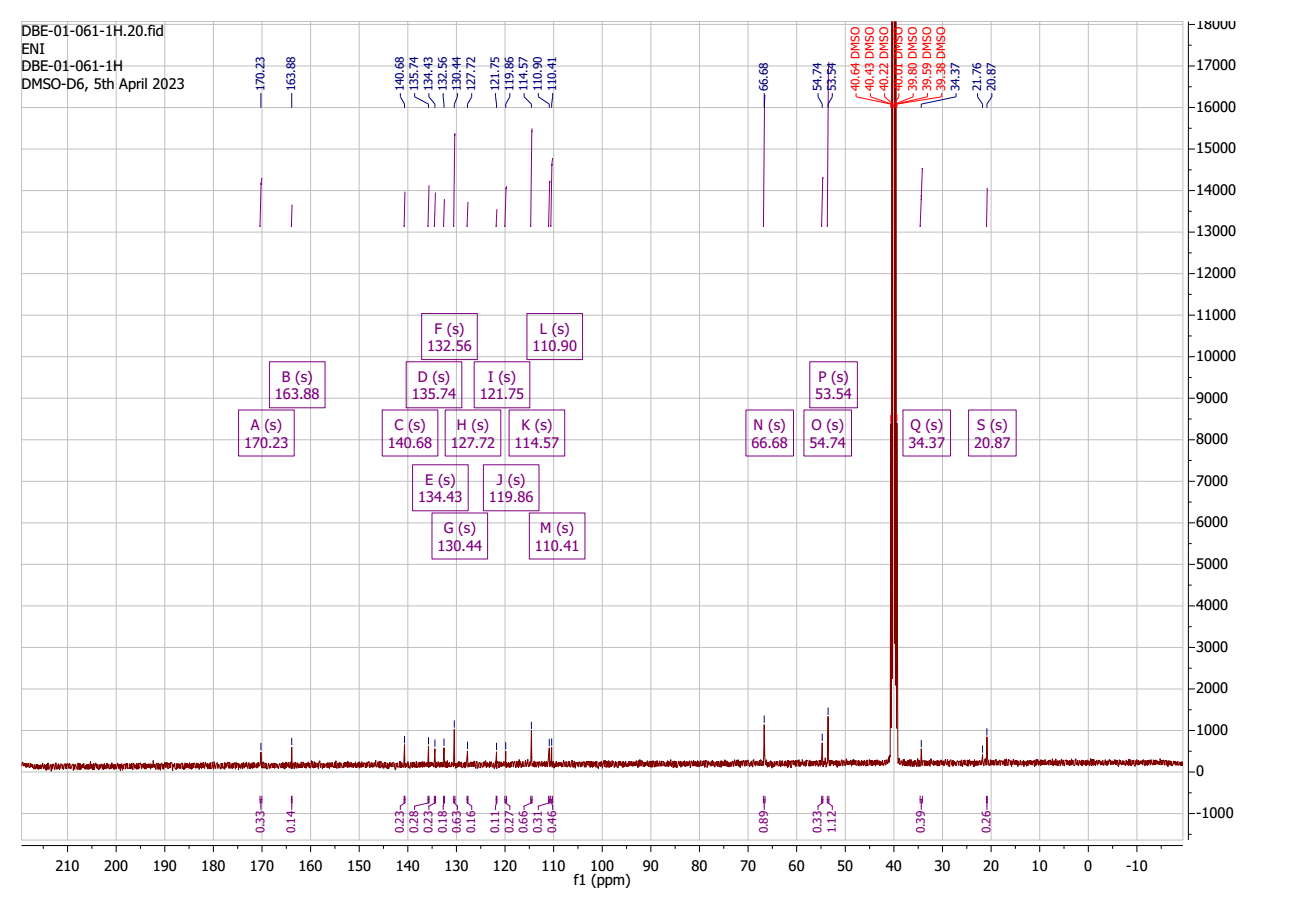


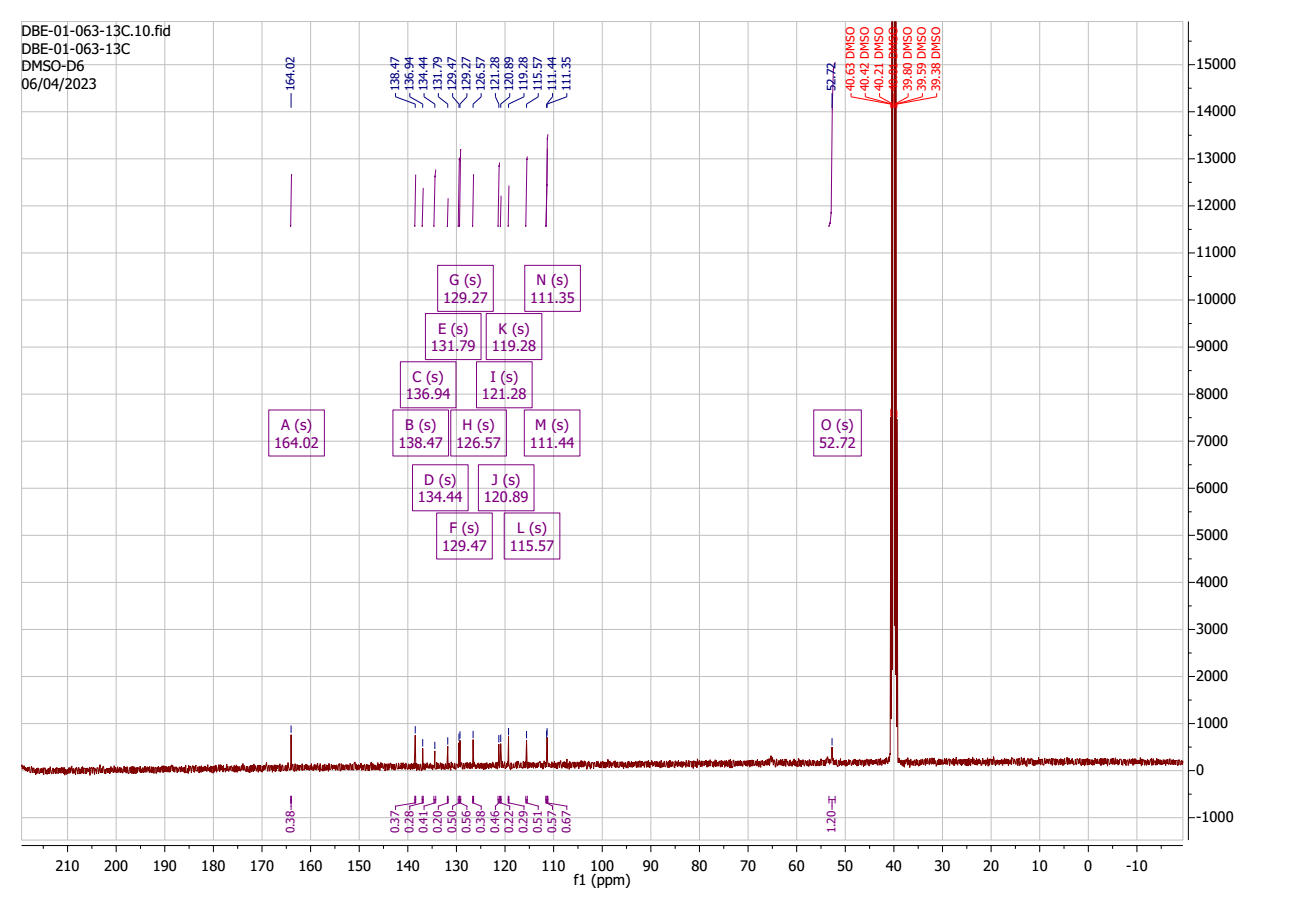


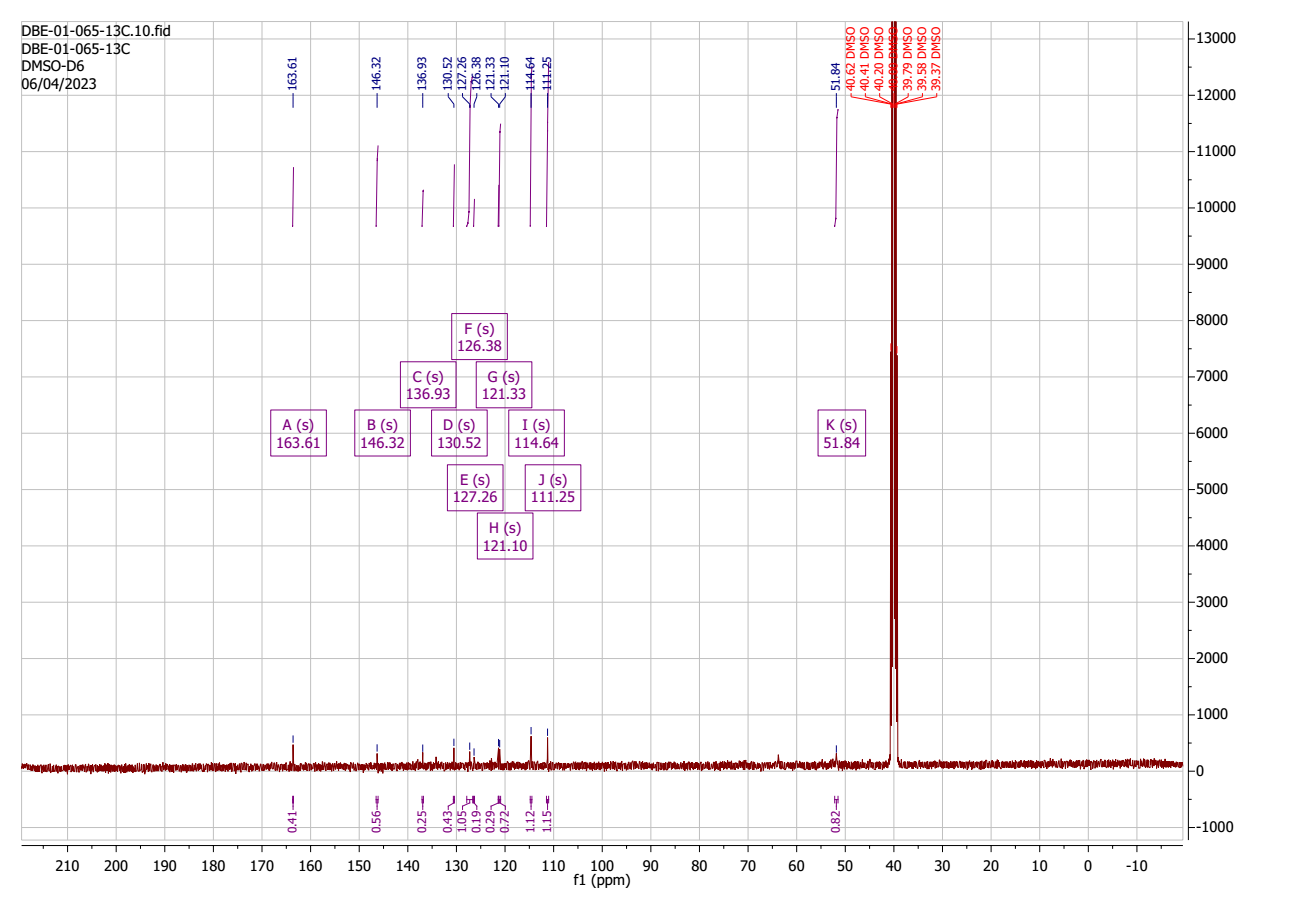


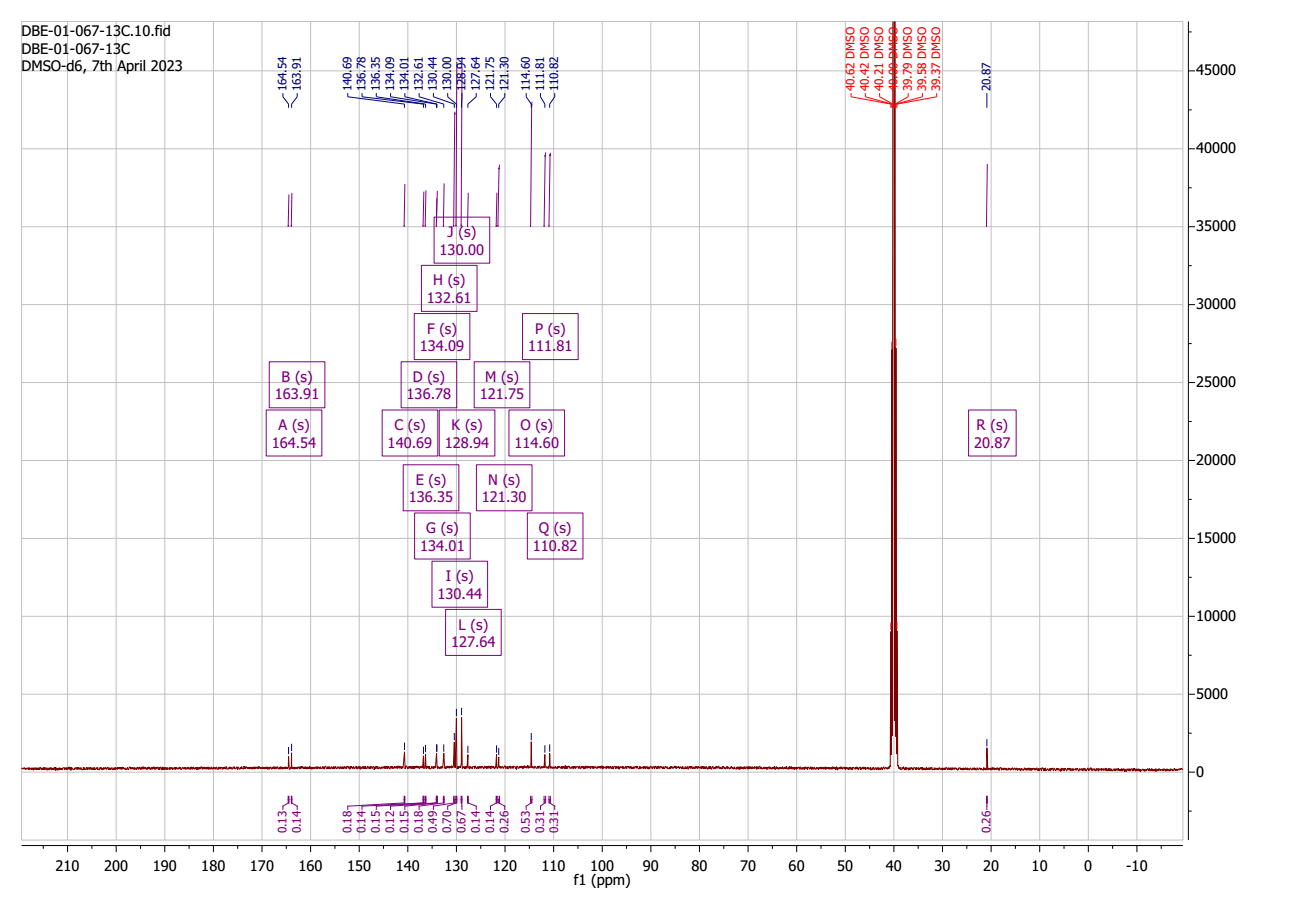


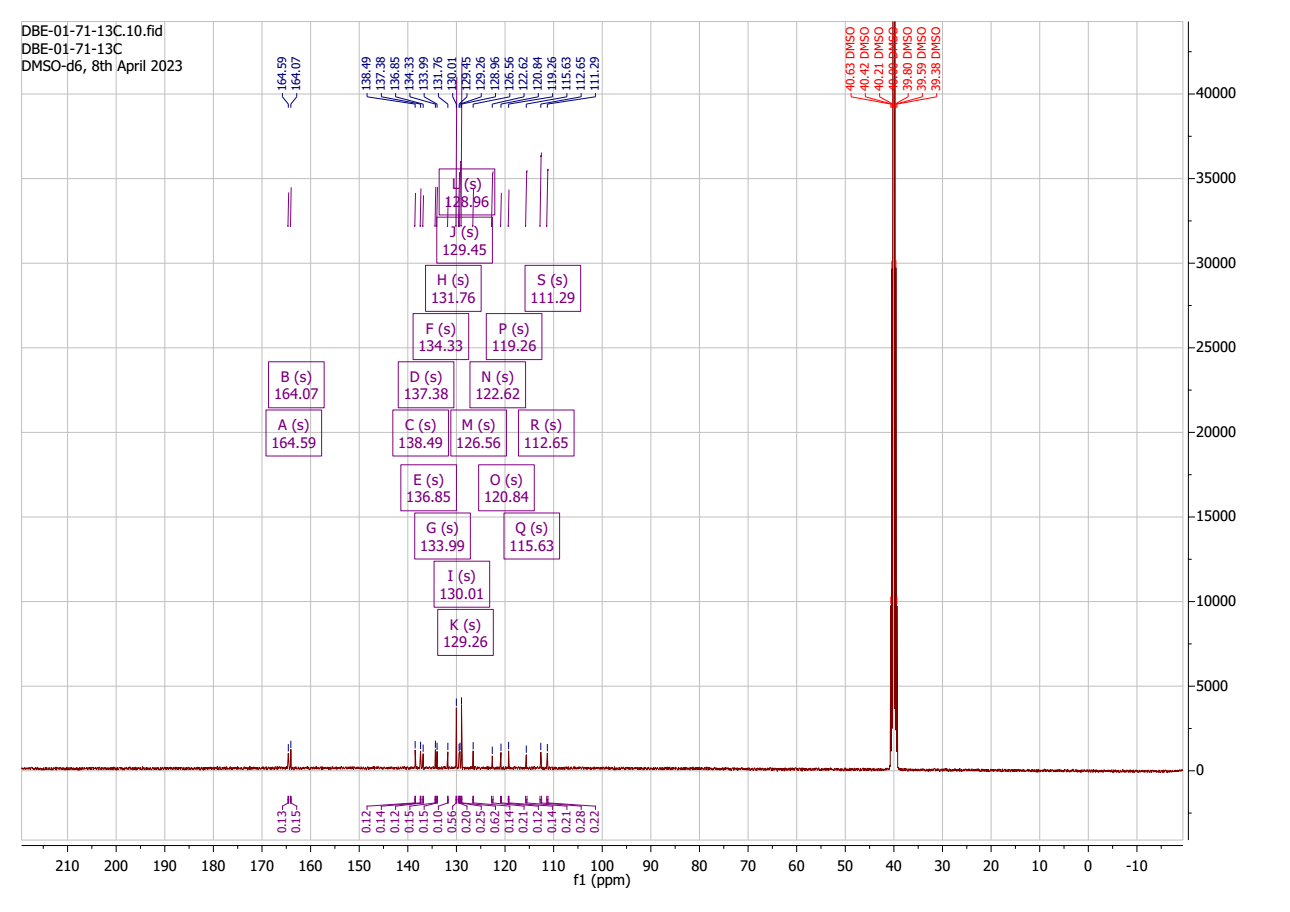


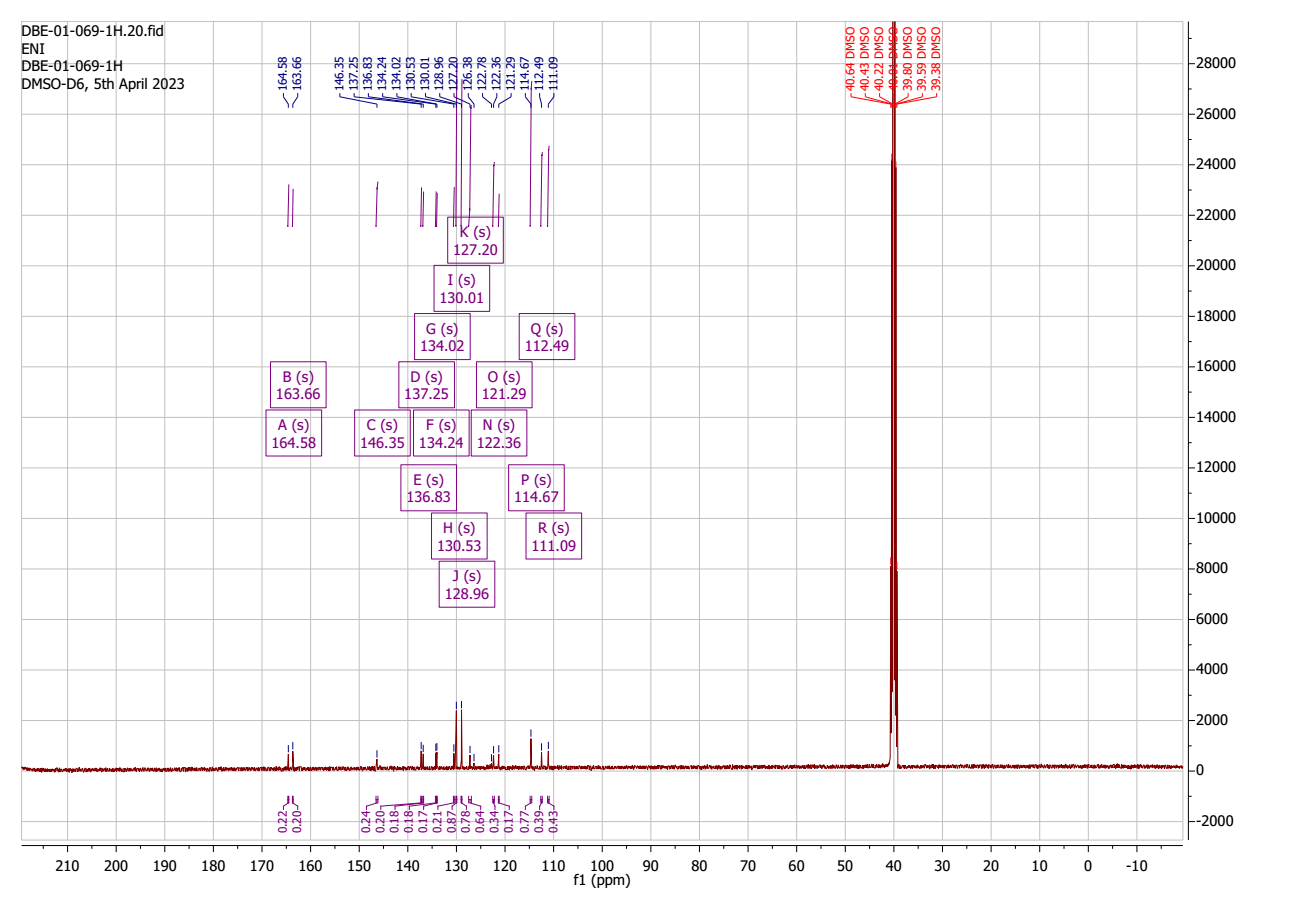


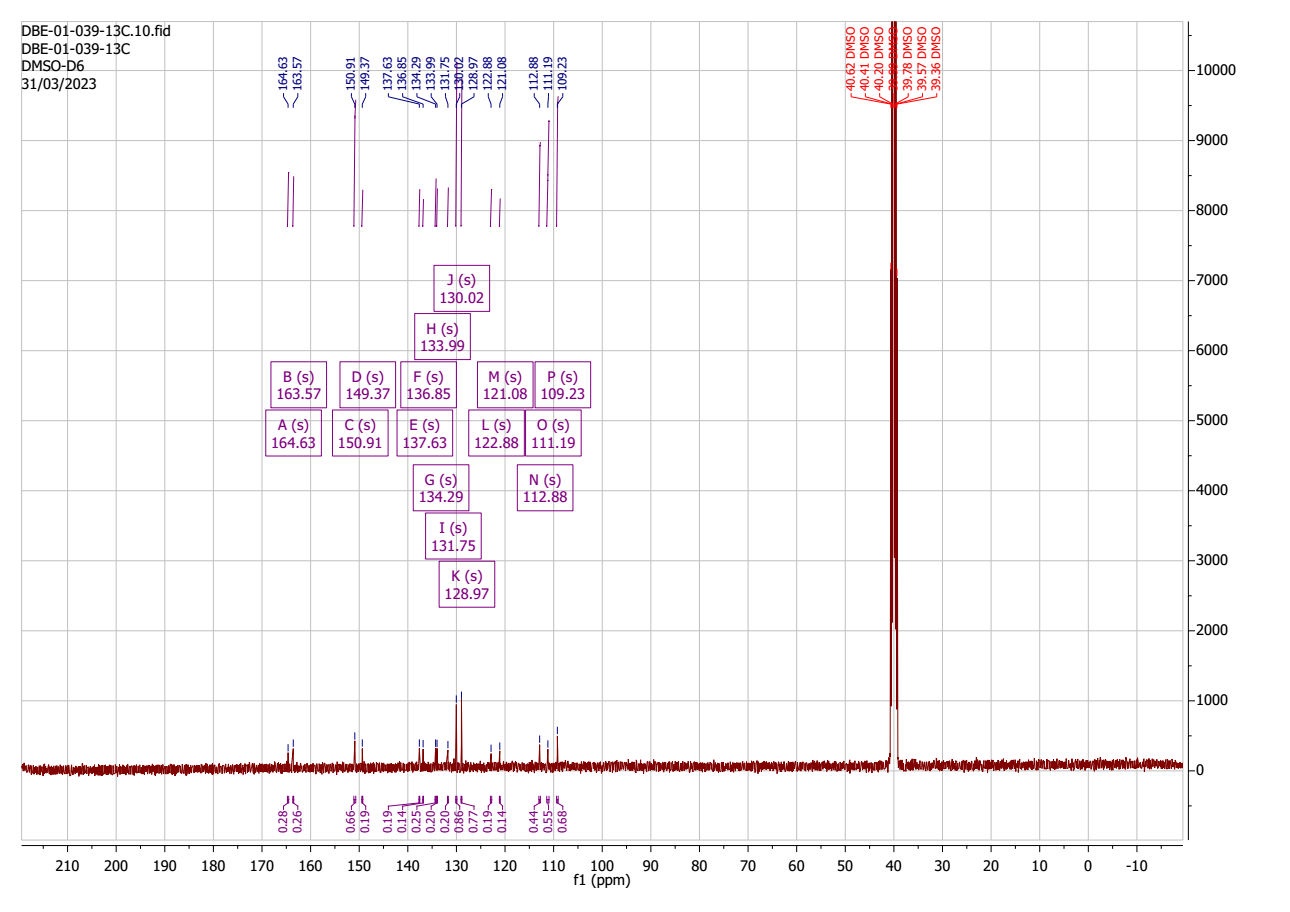


**LC-MS DATA**


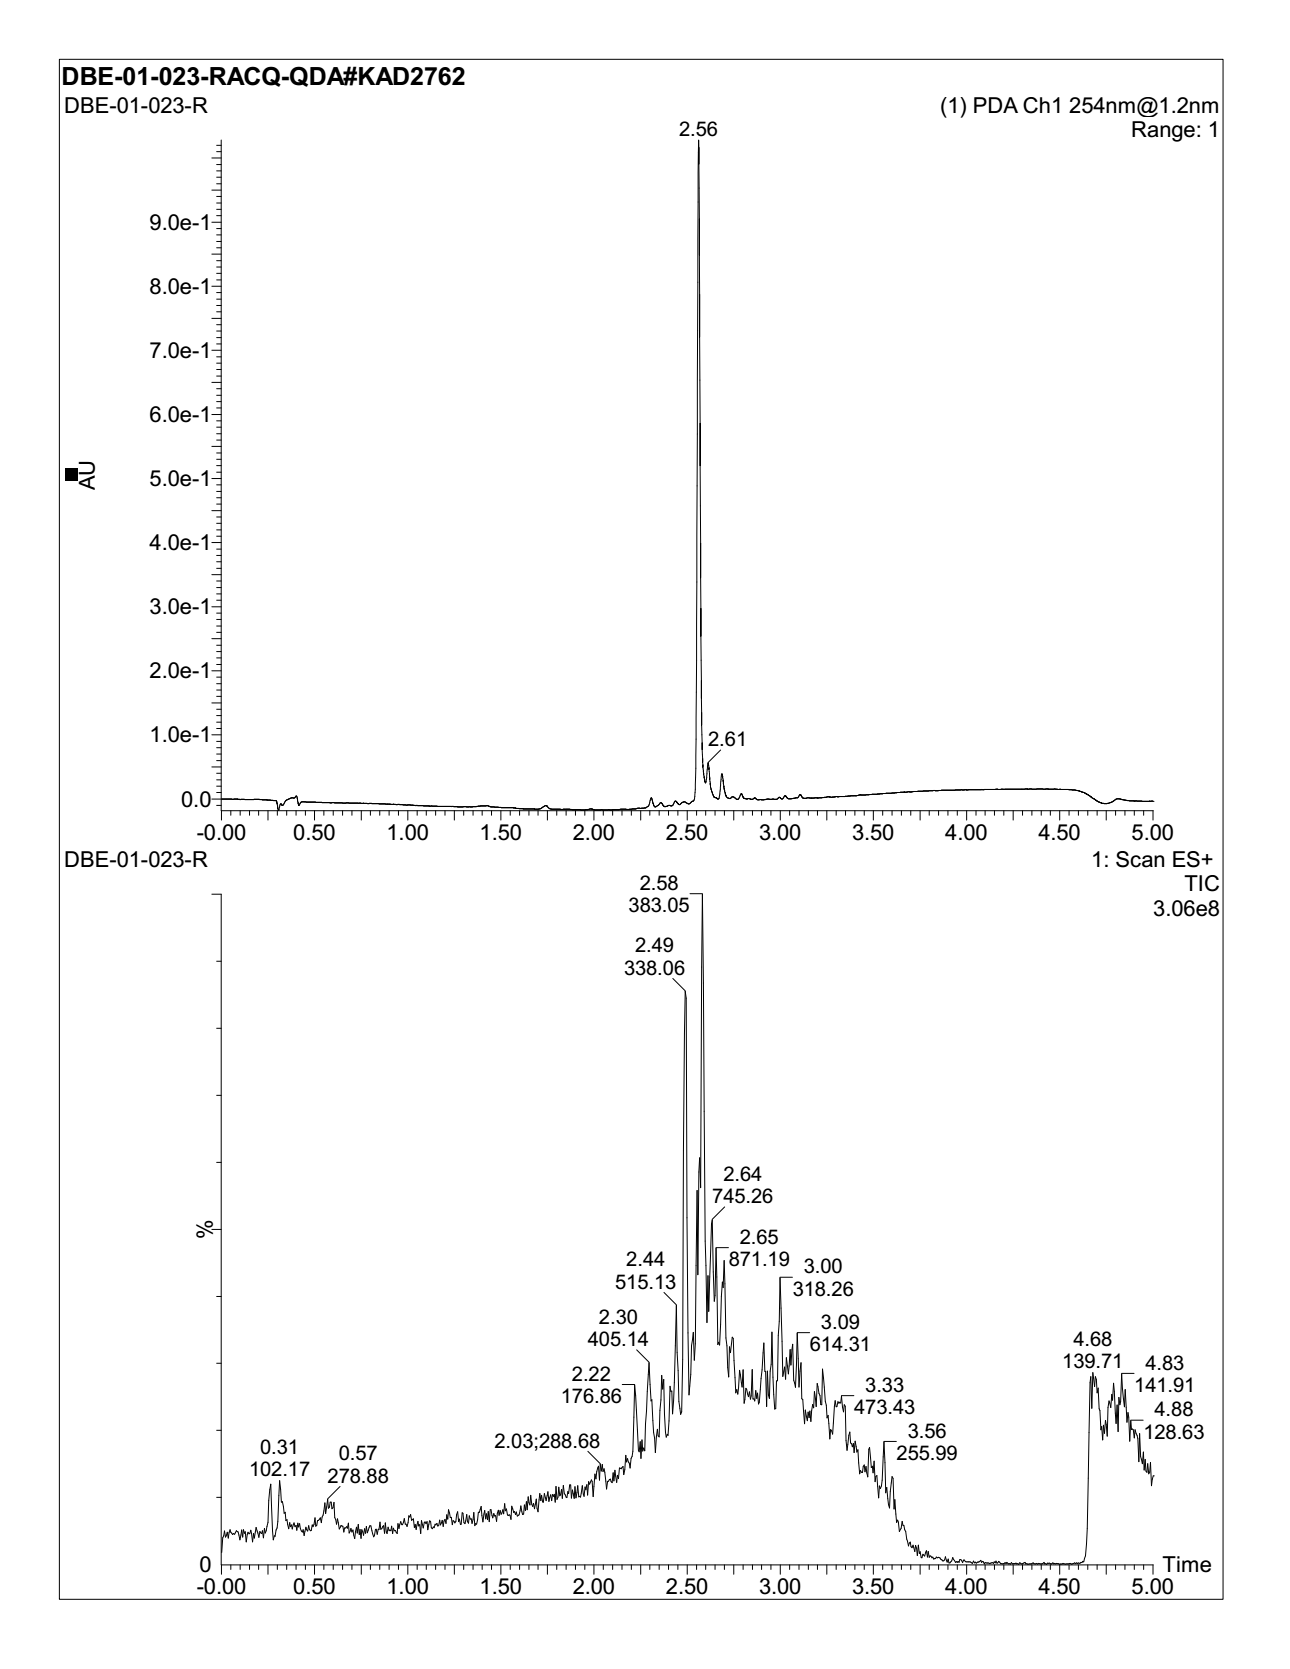


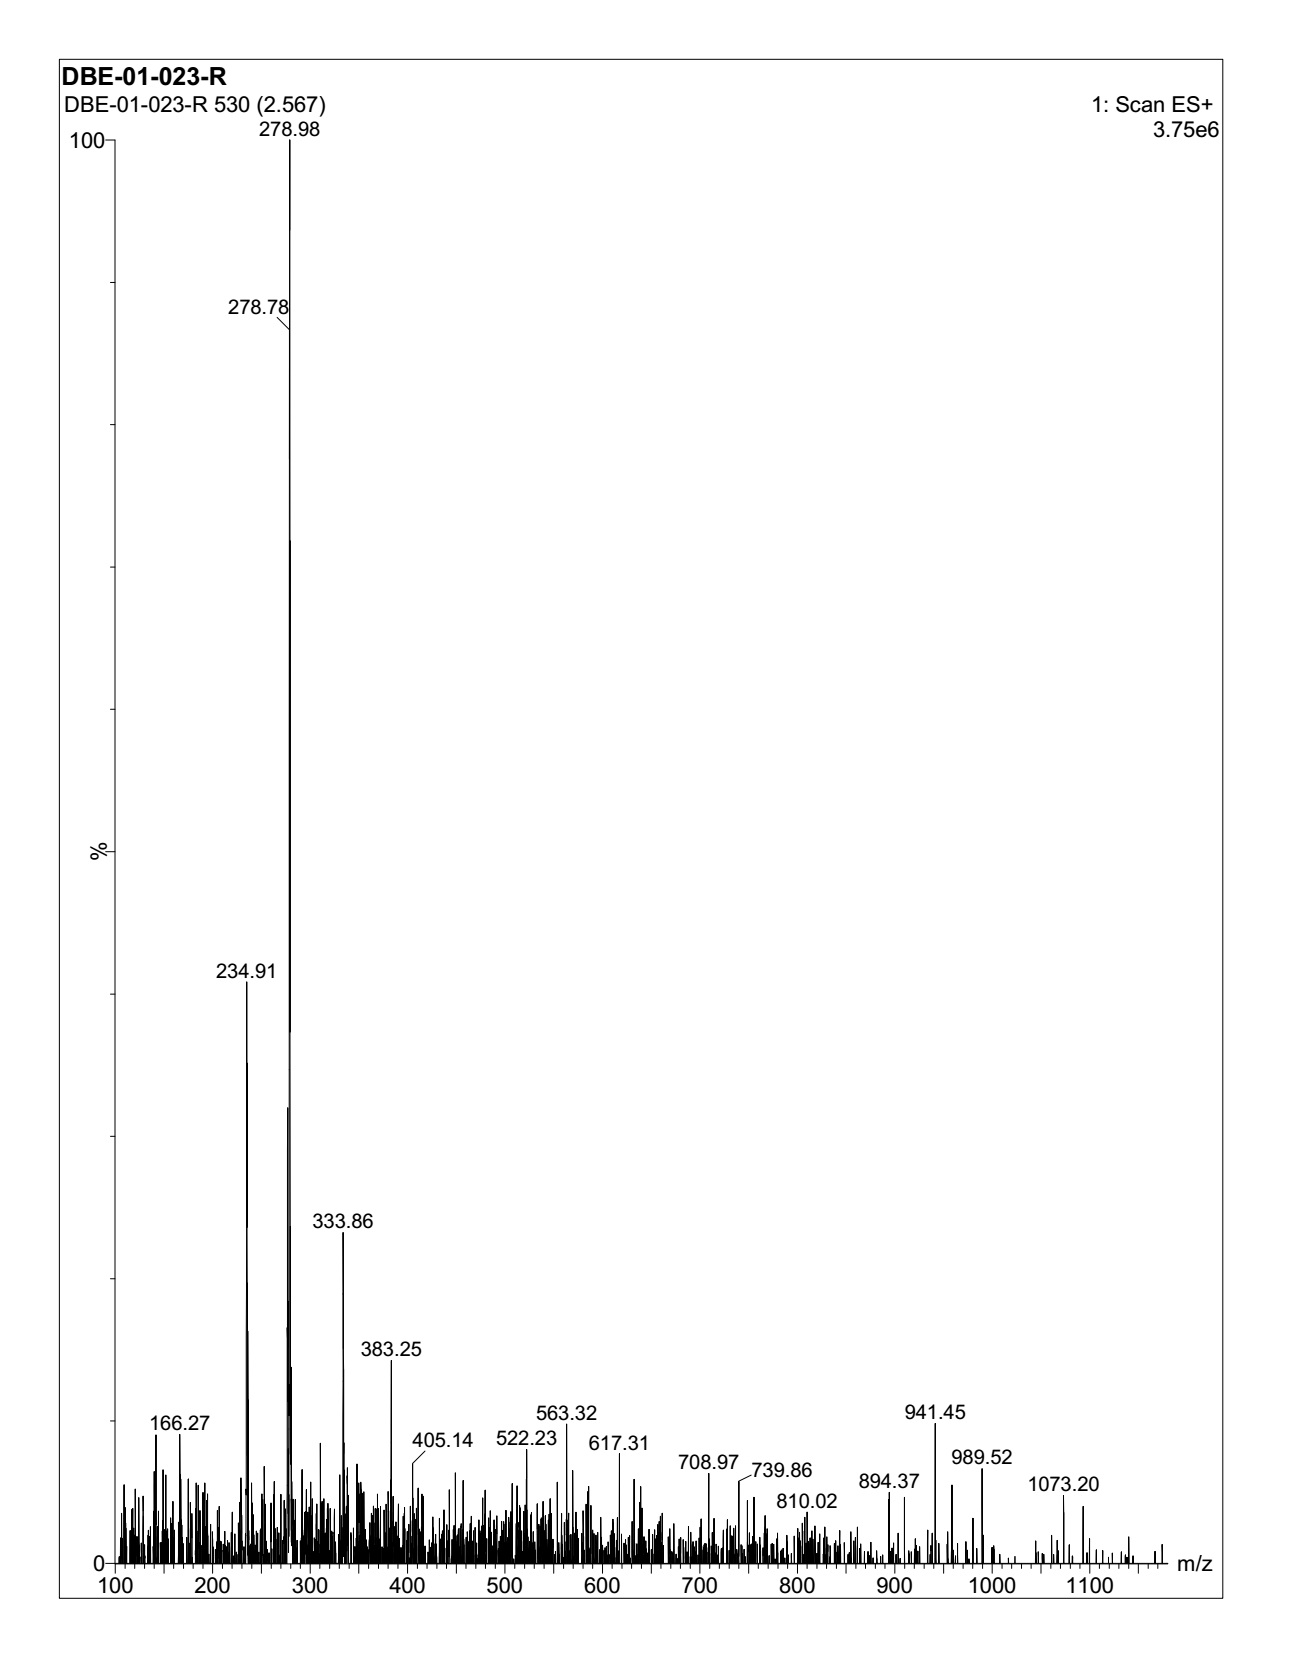


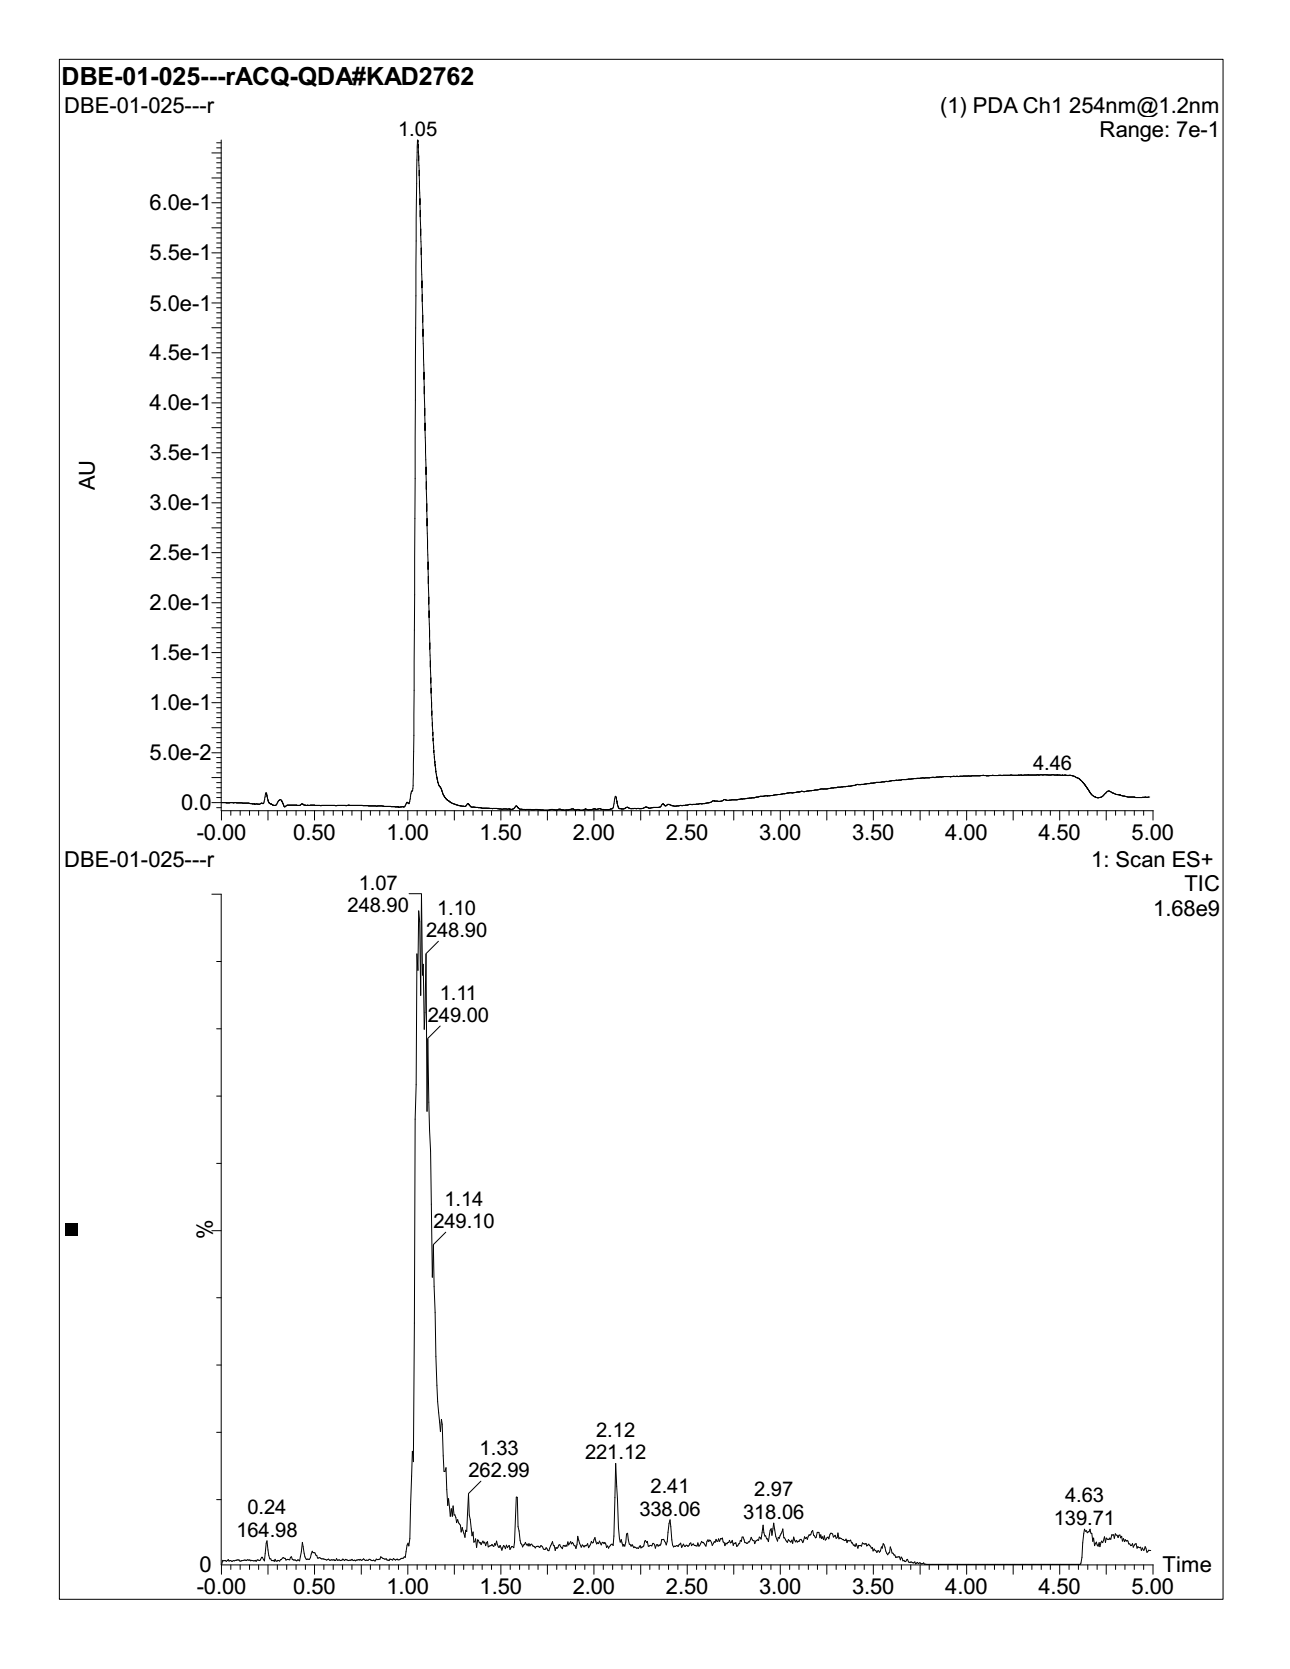


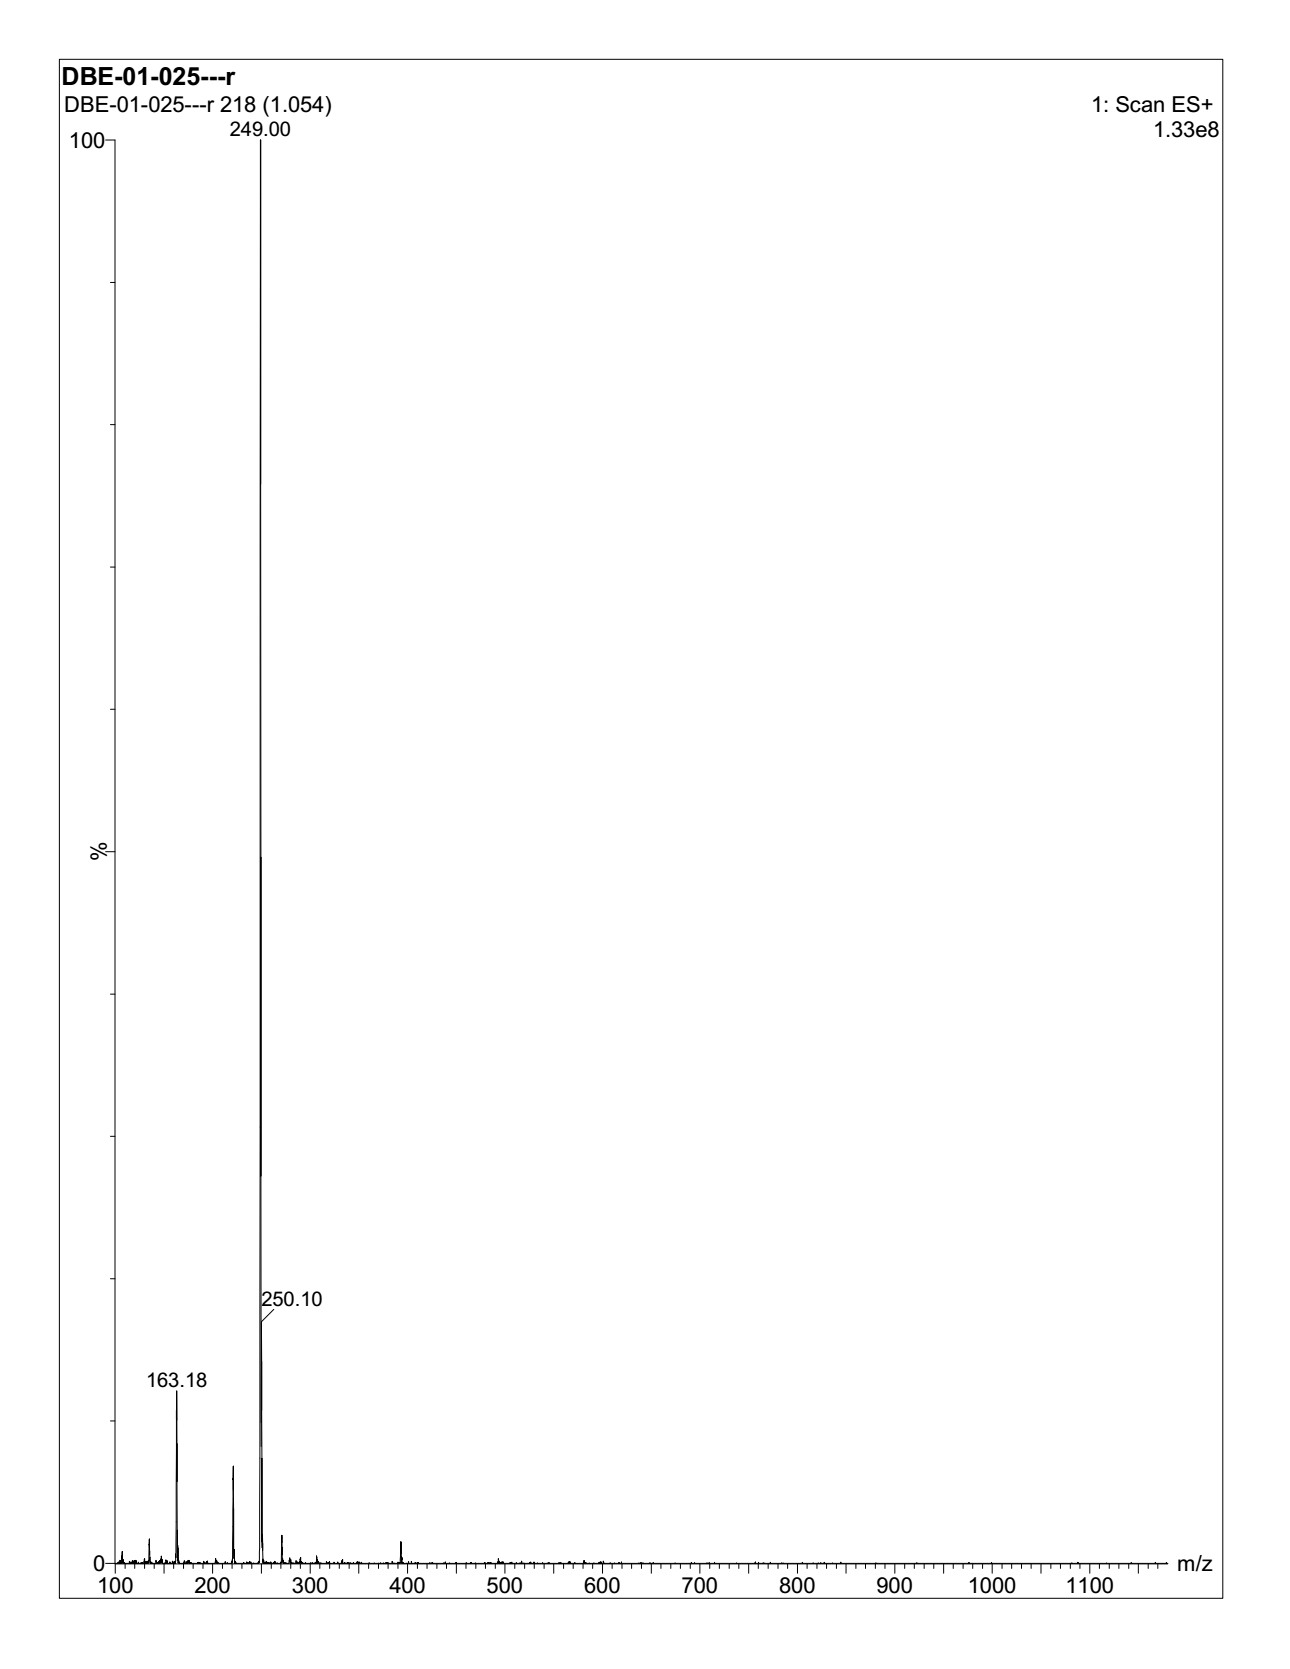


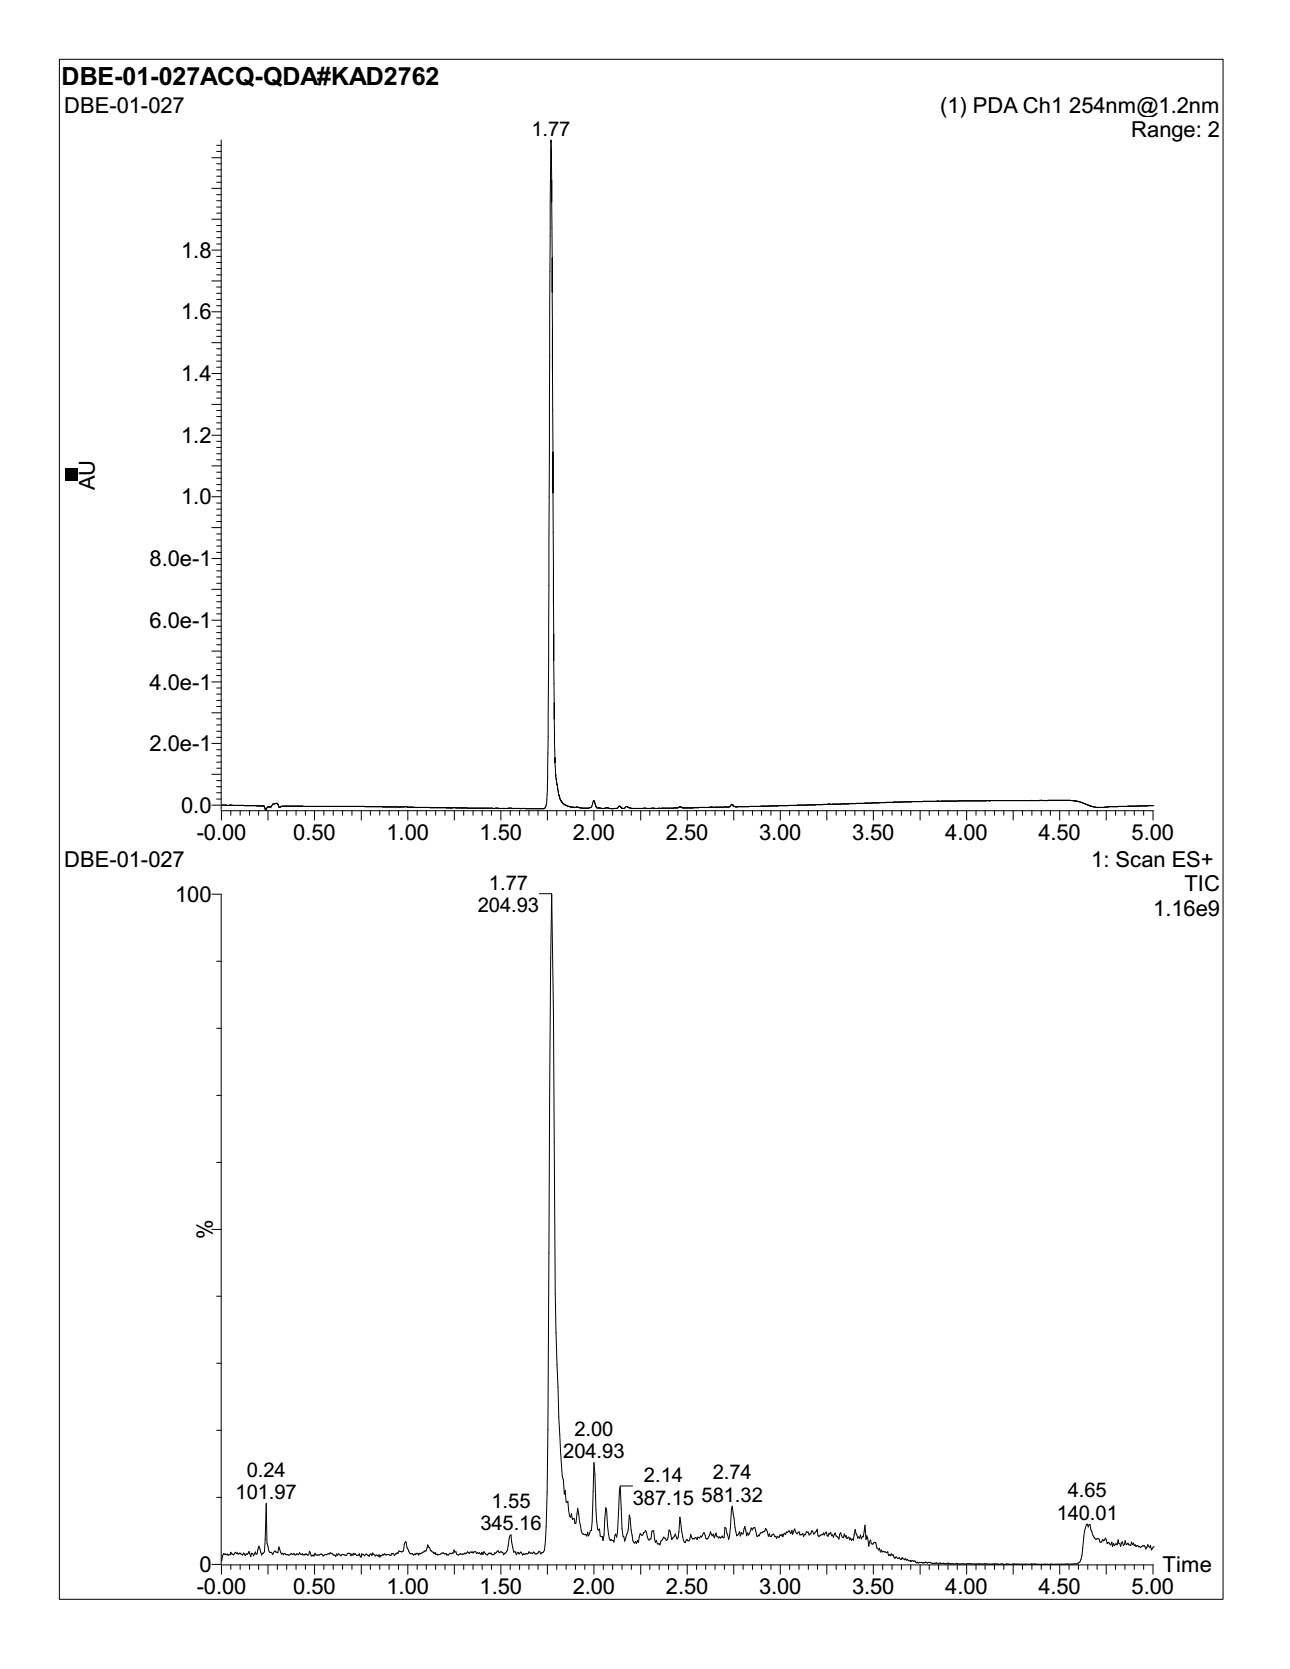


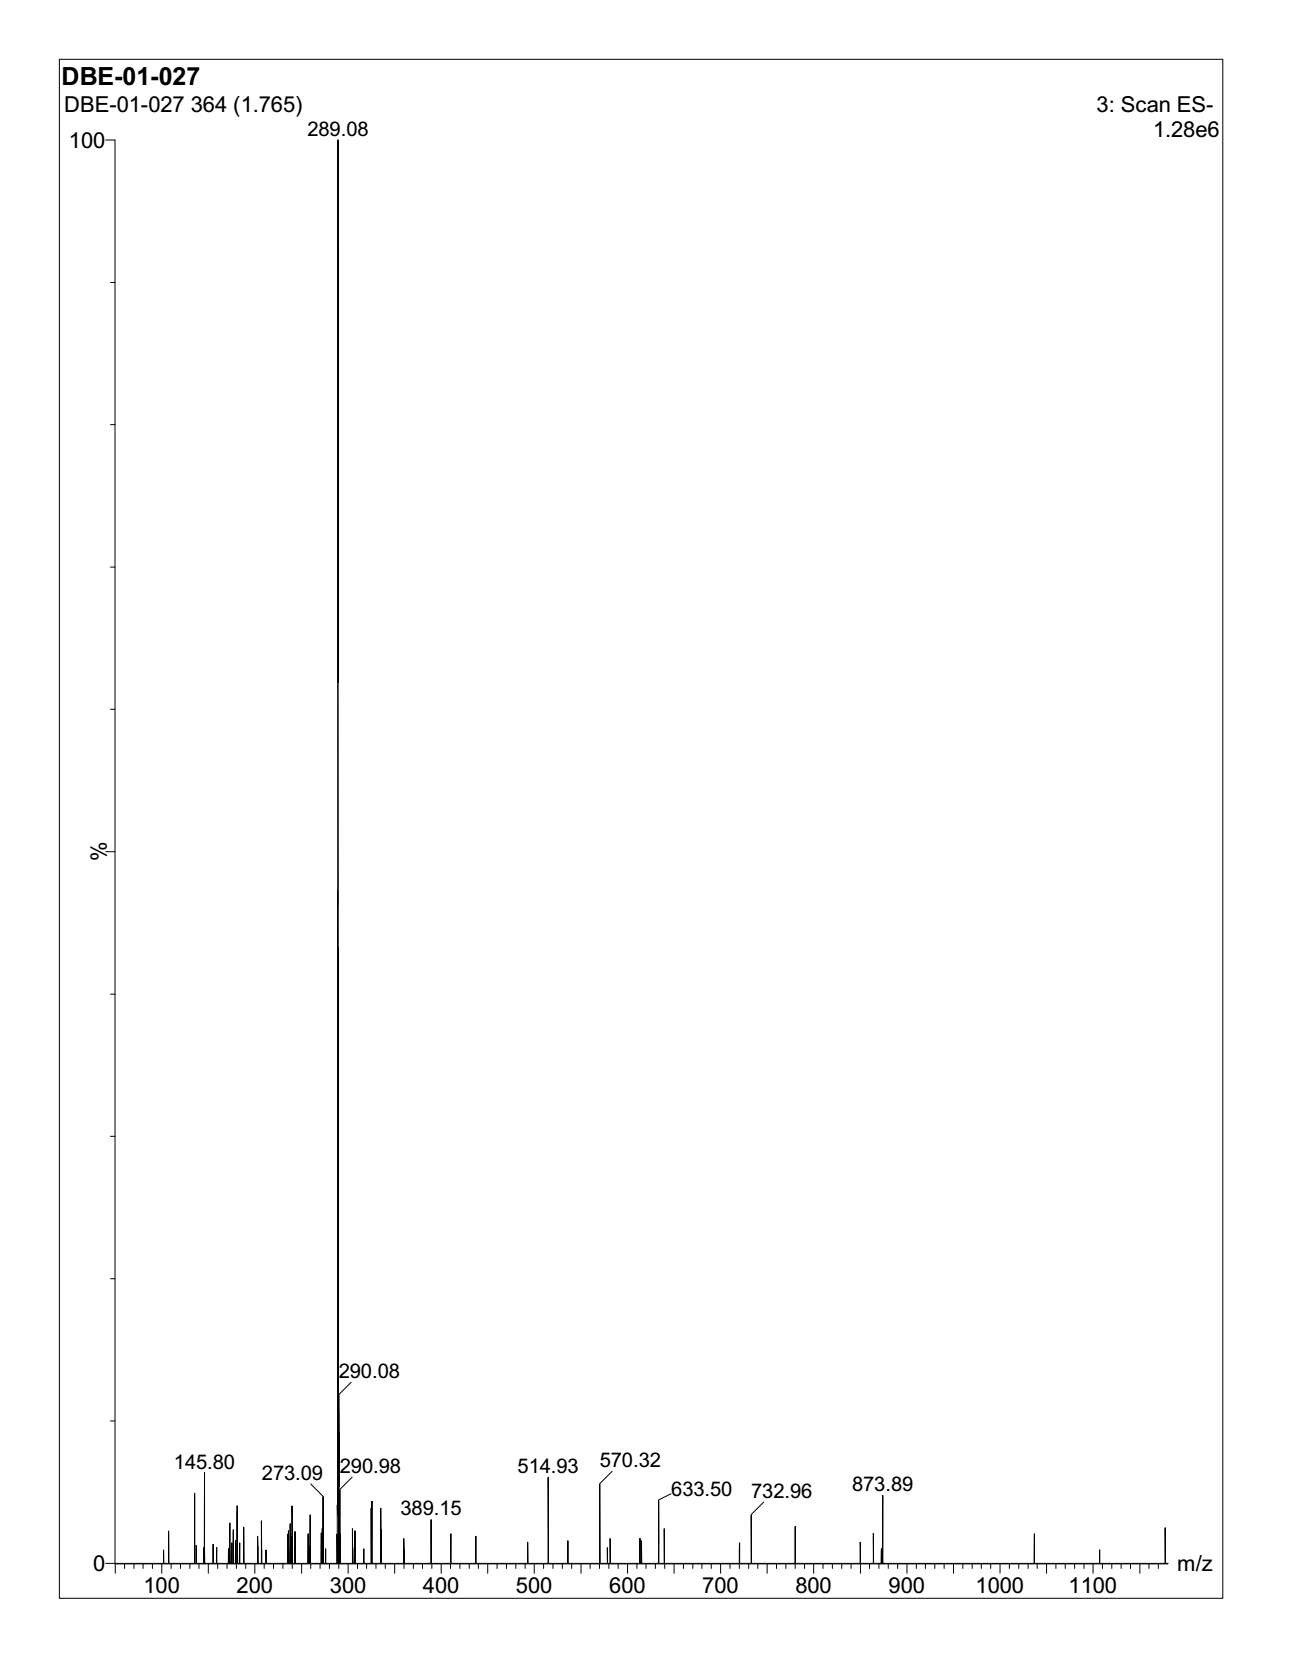


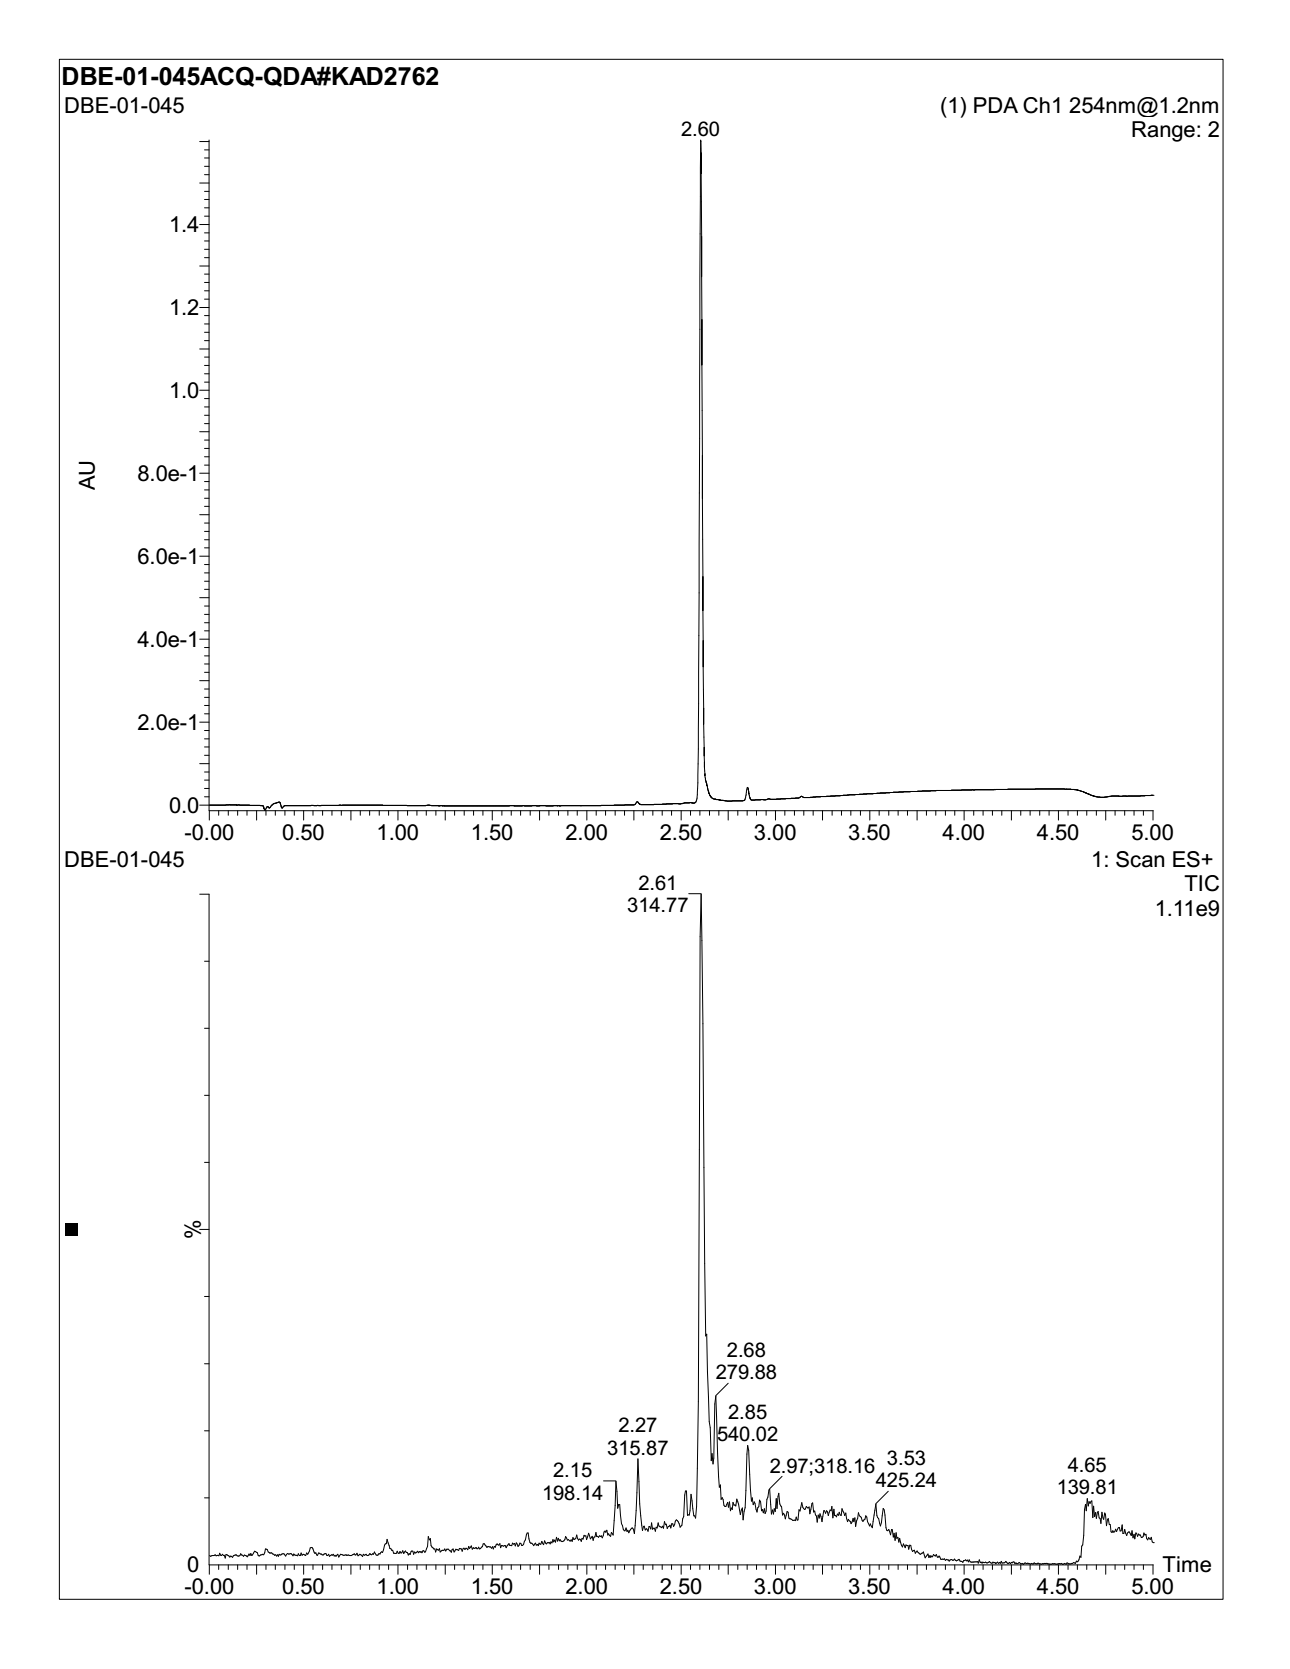


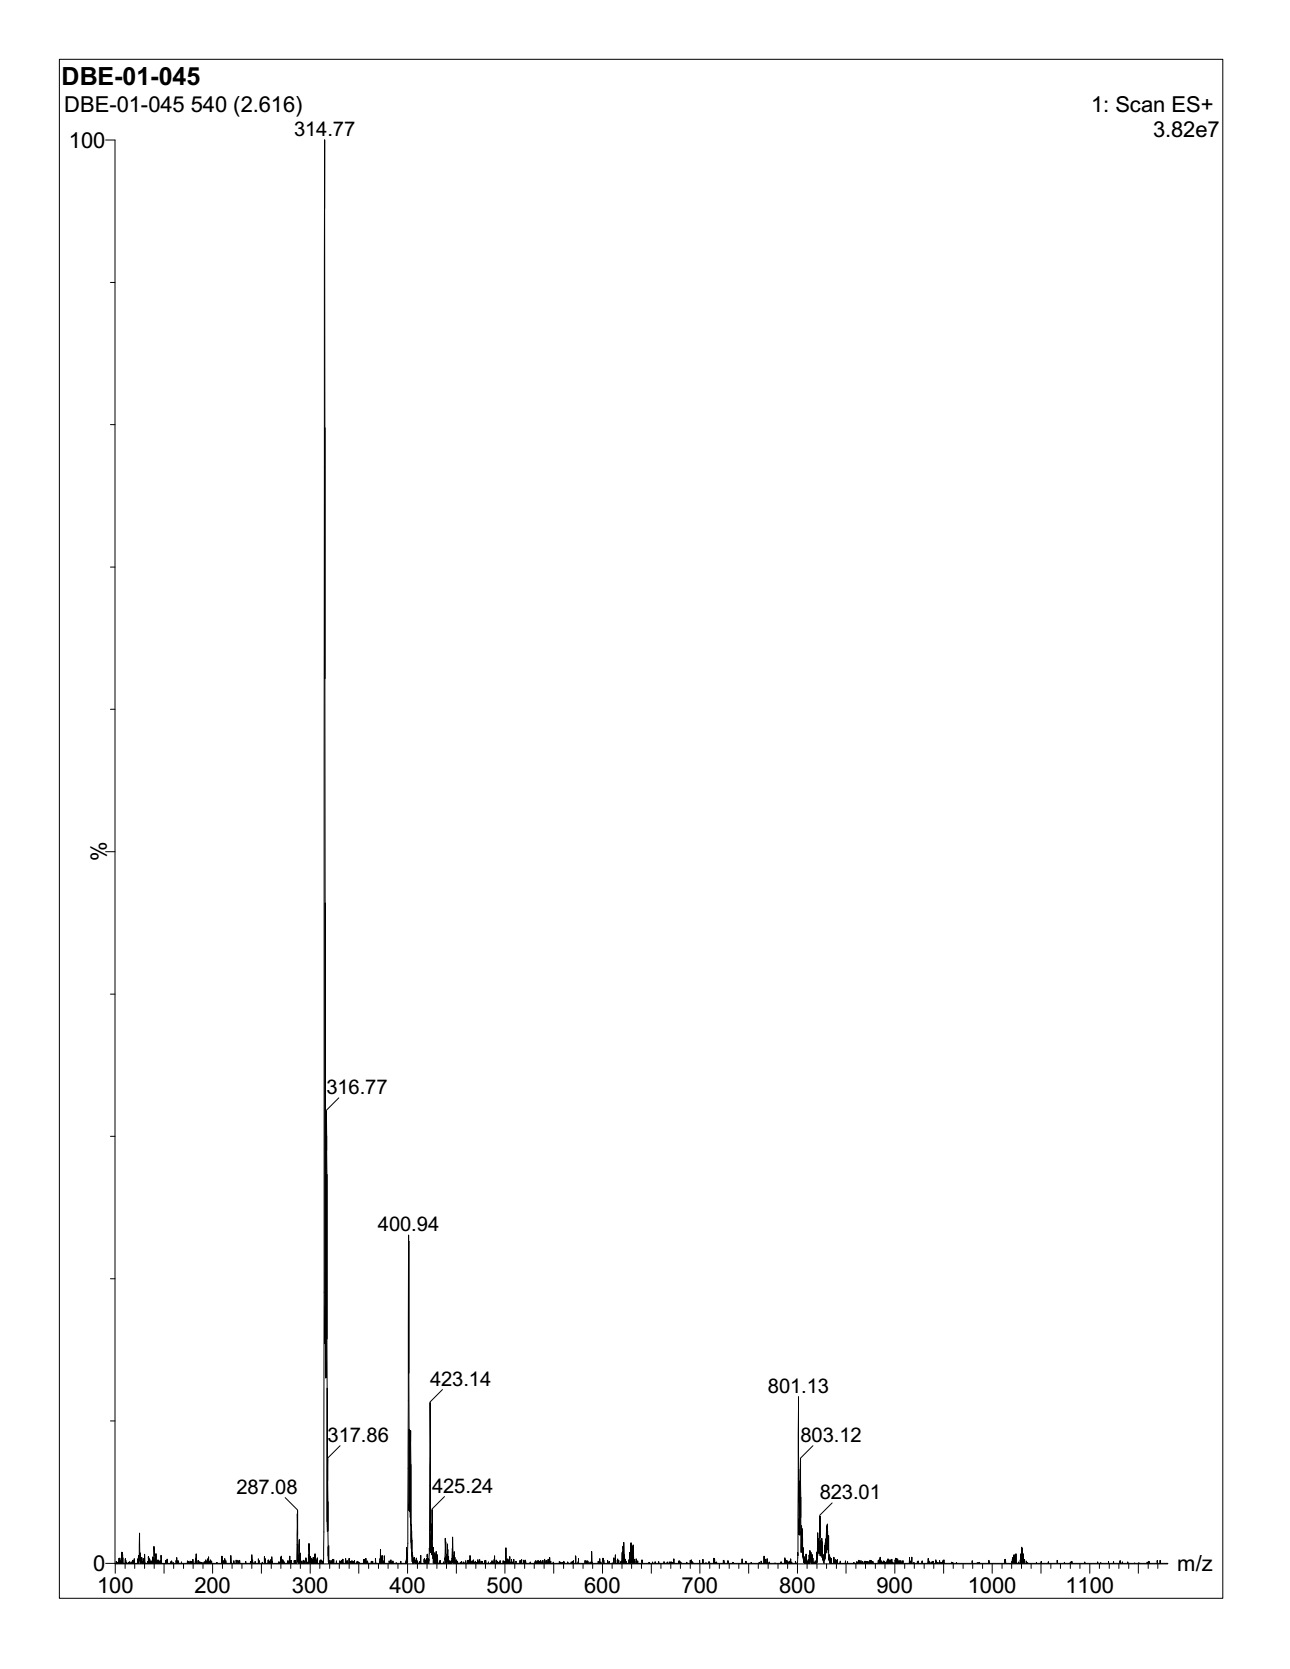


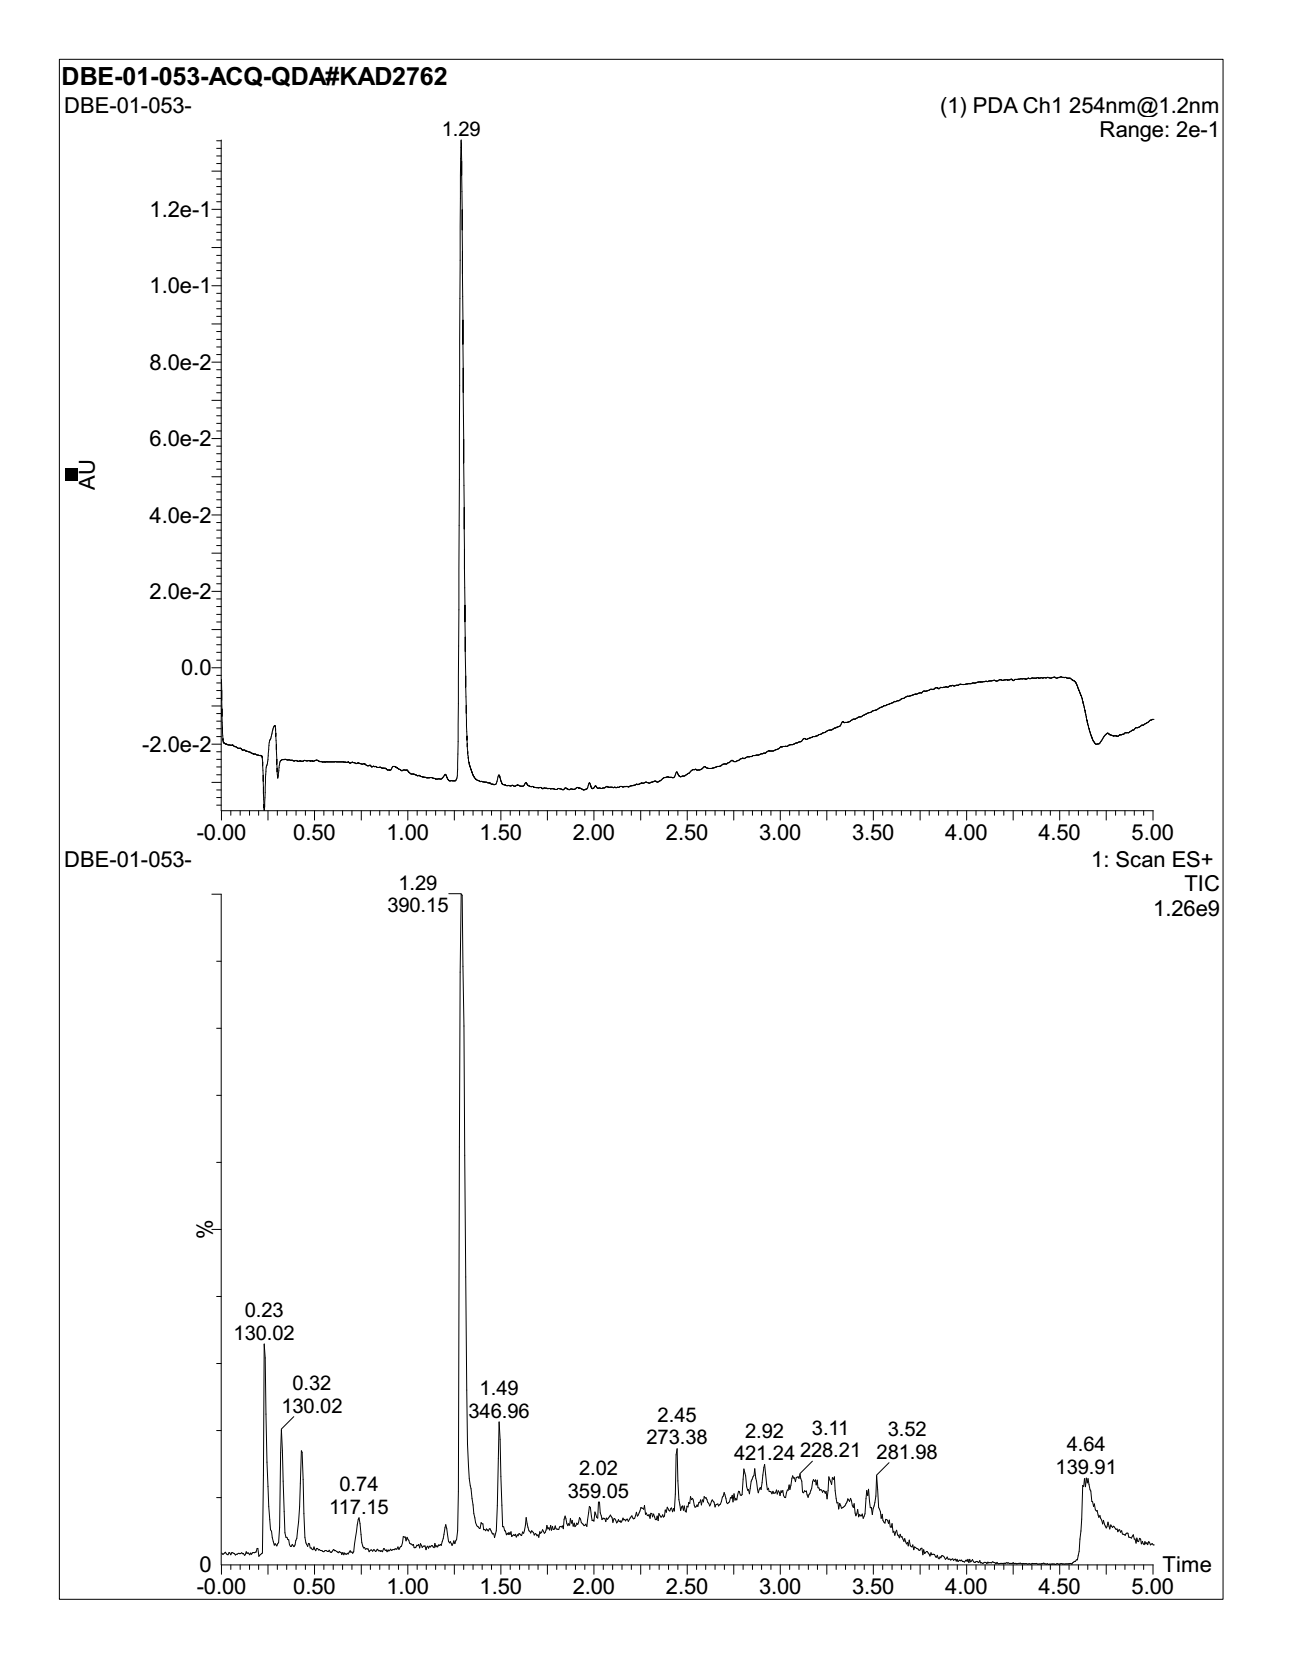


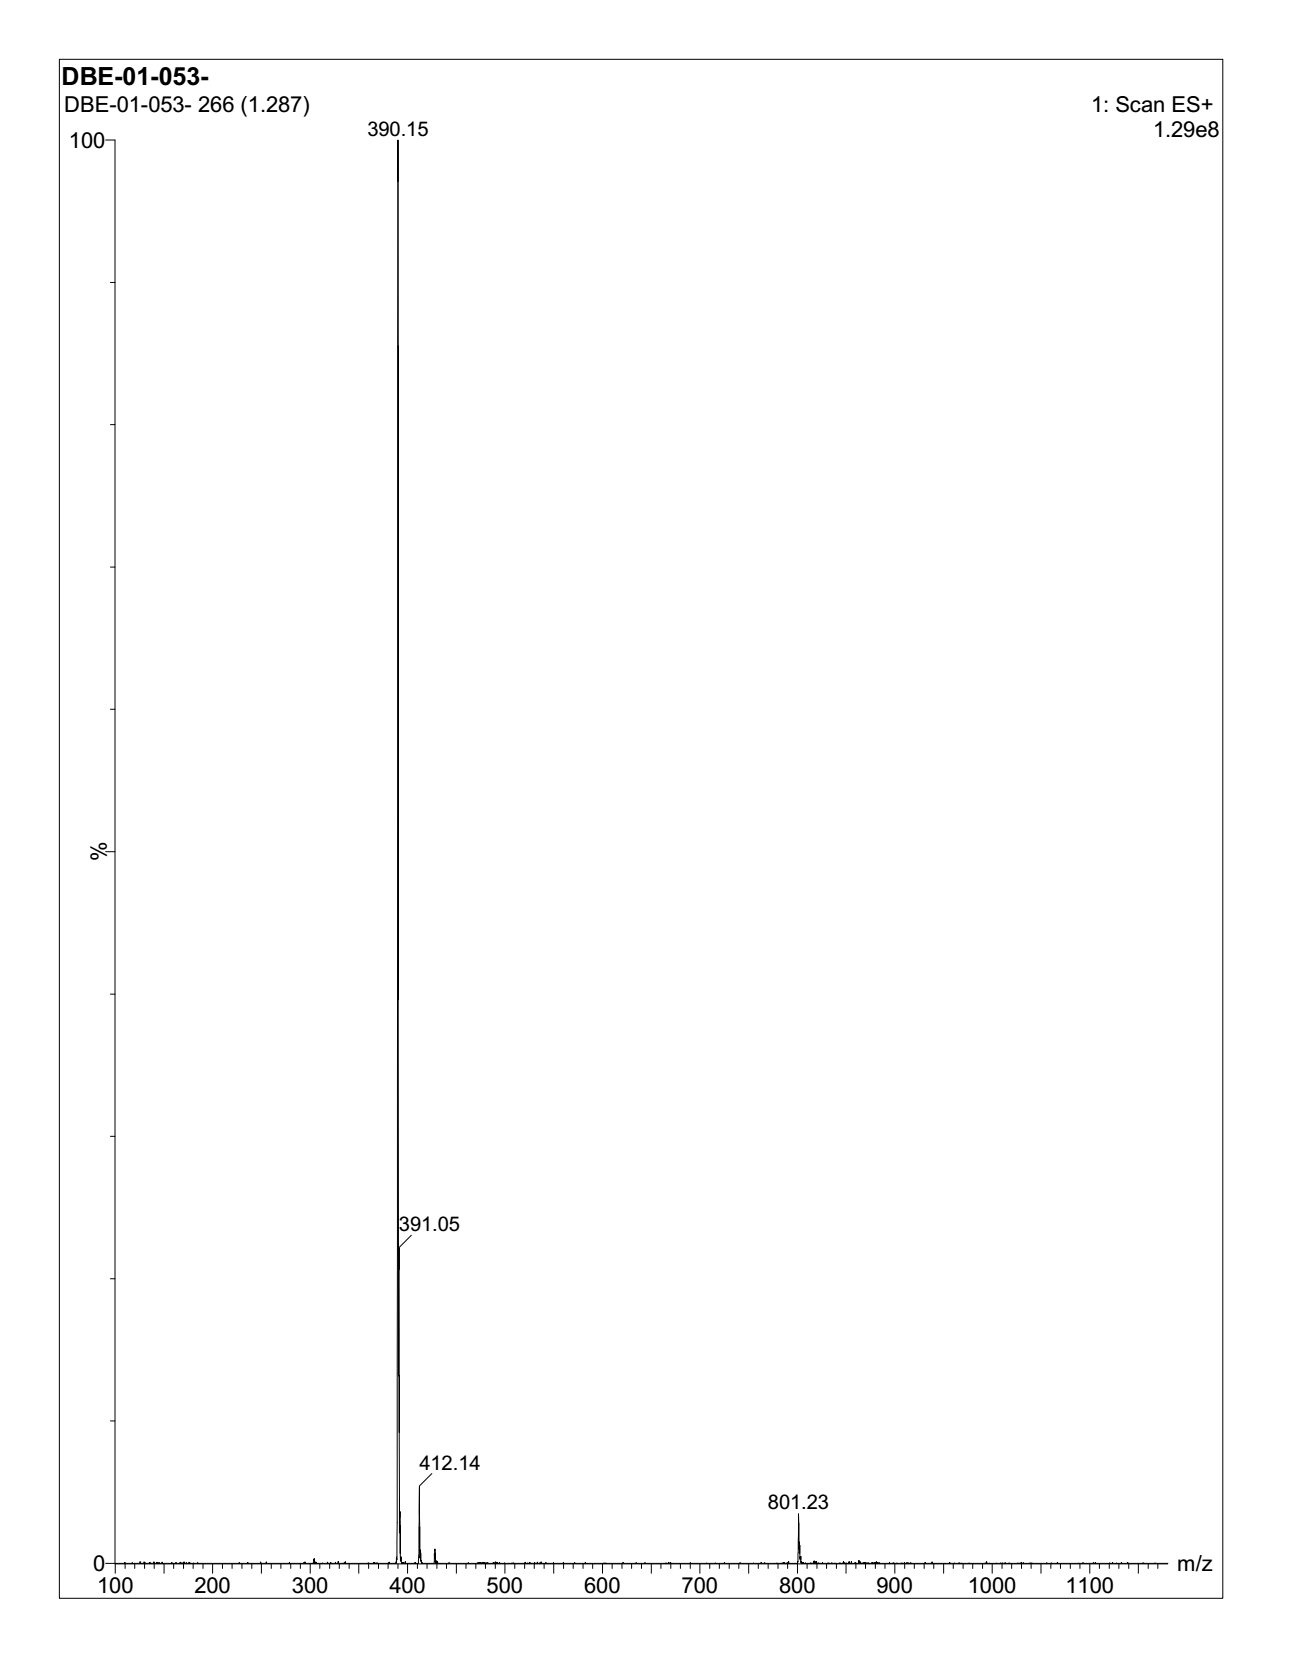


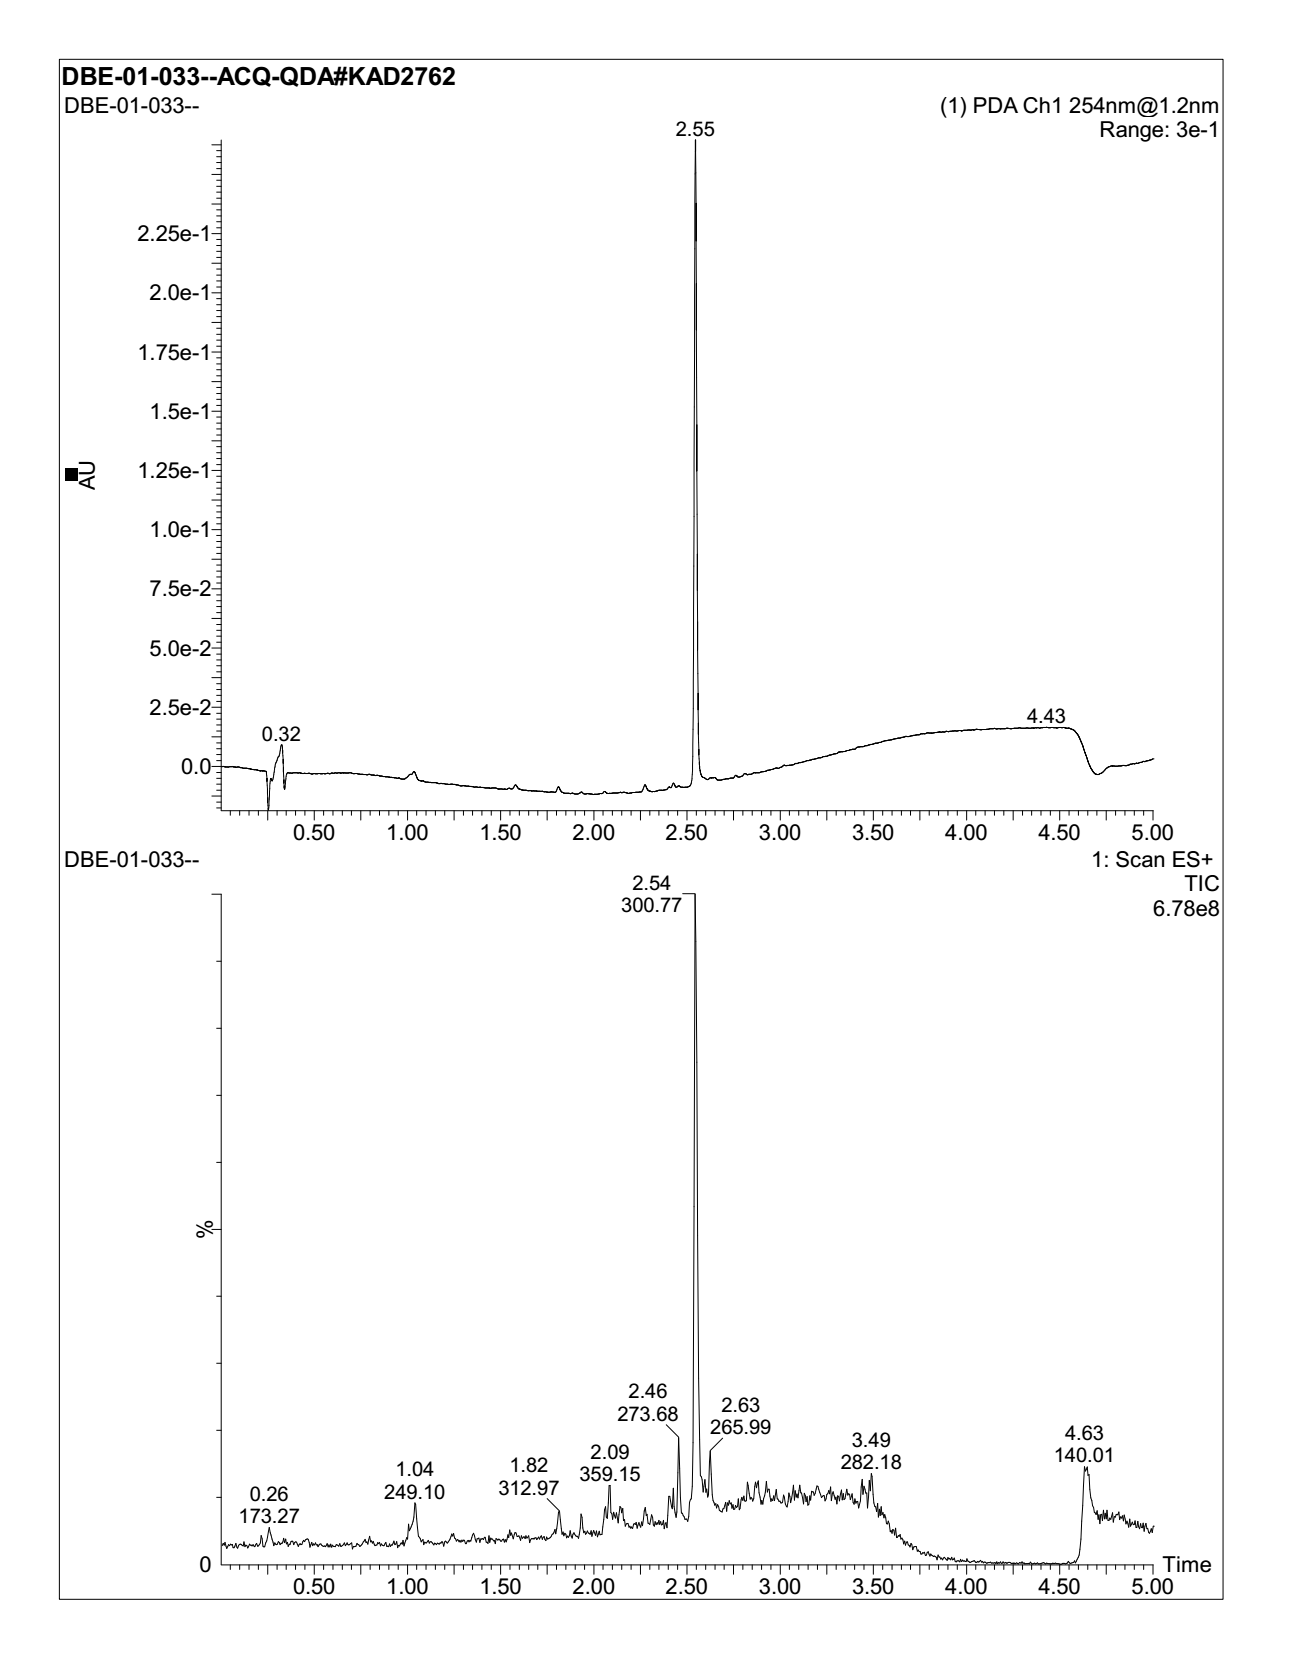


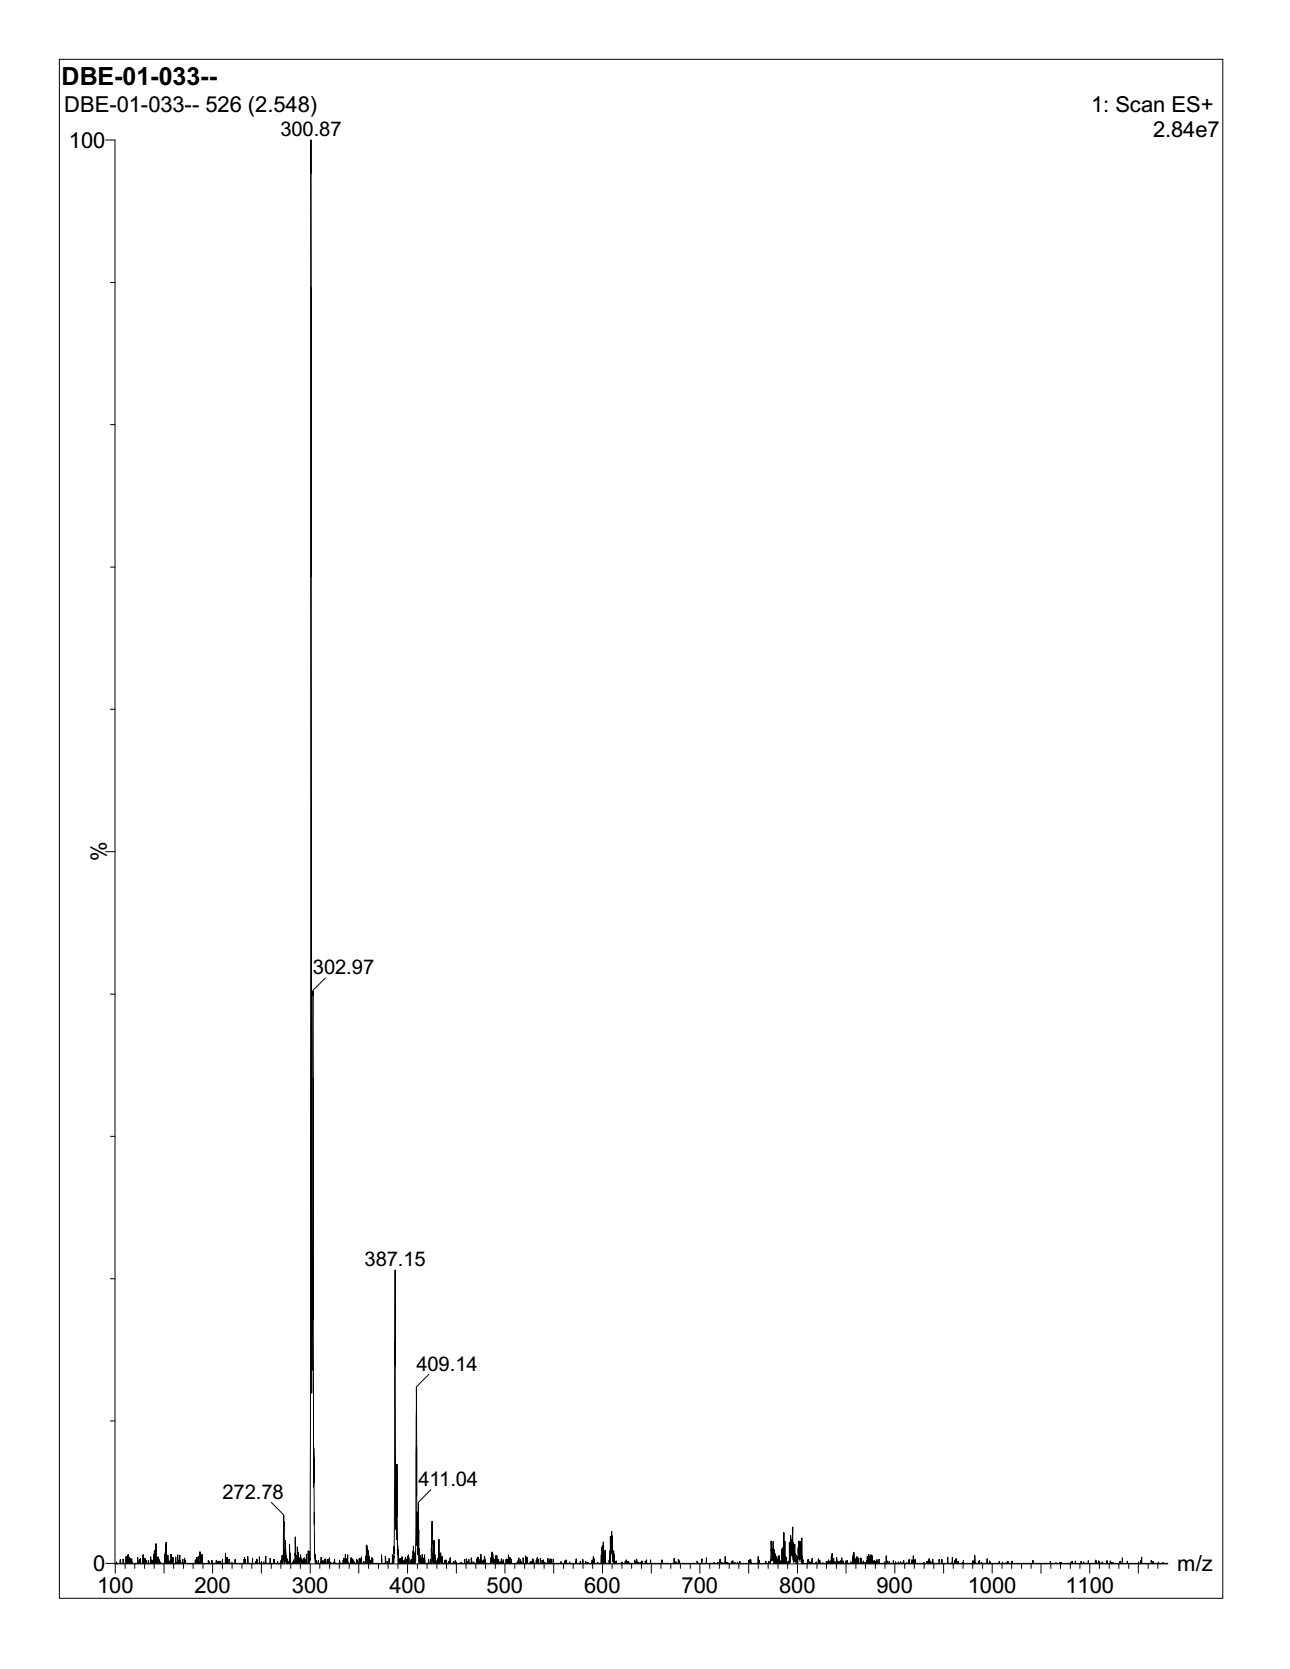


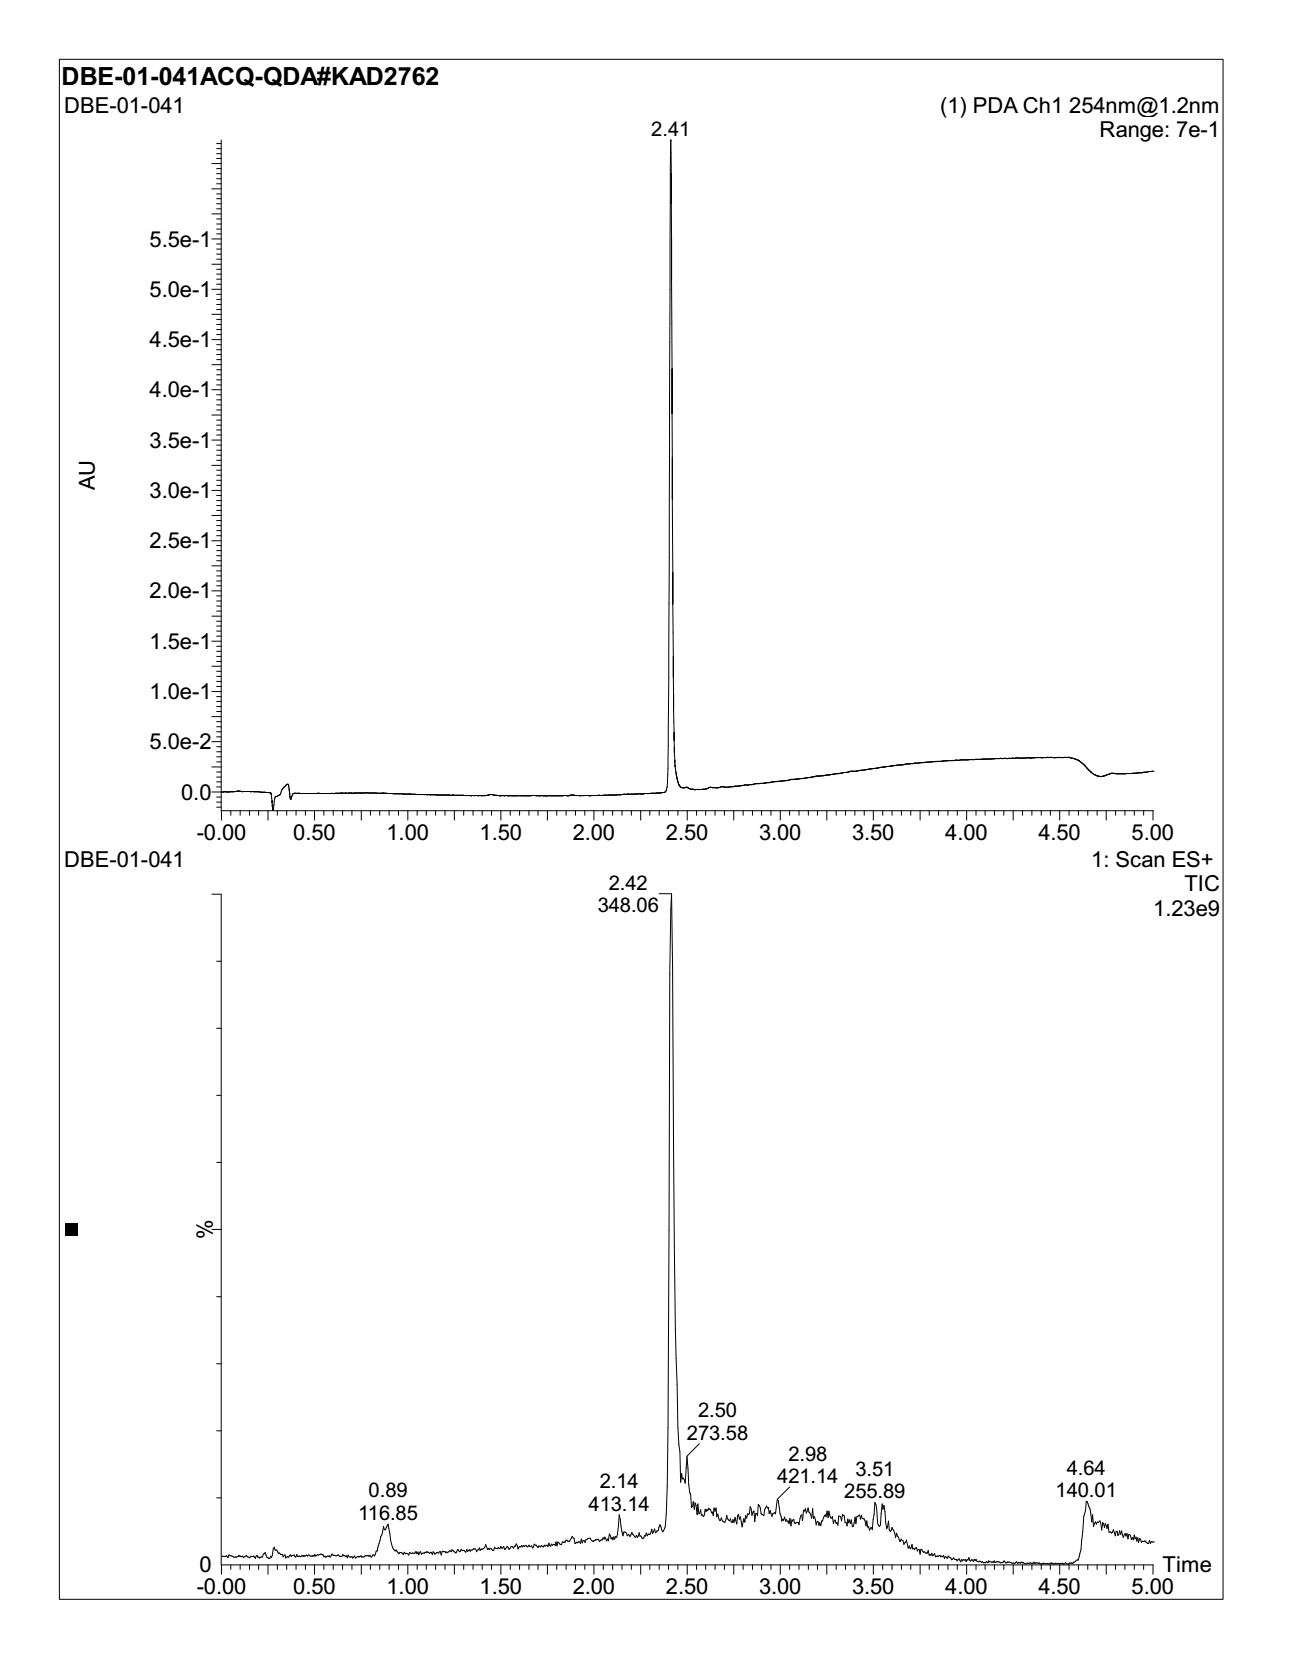


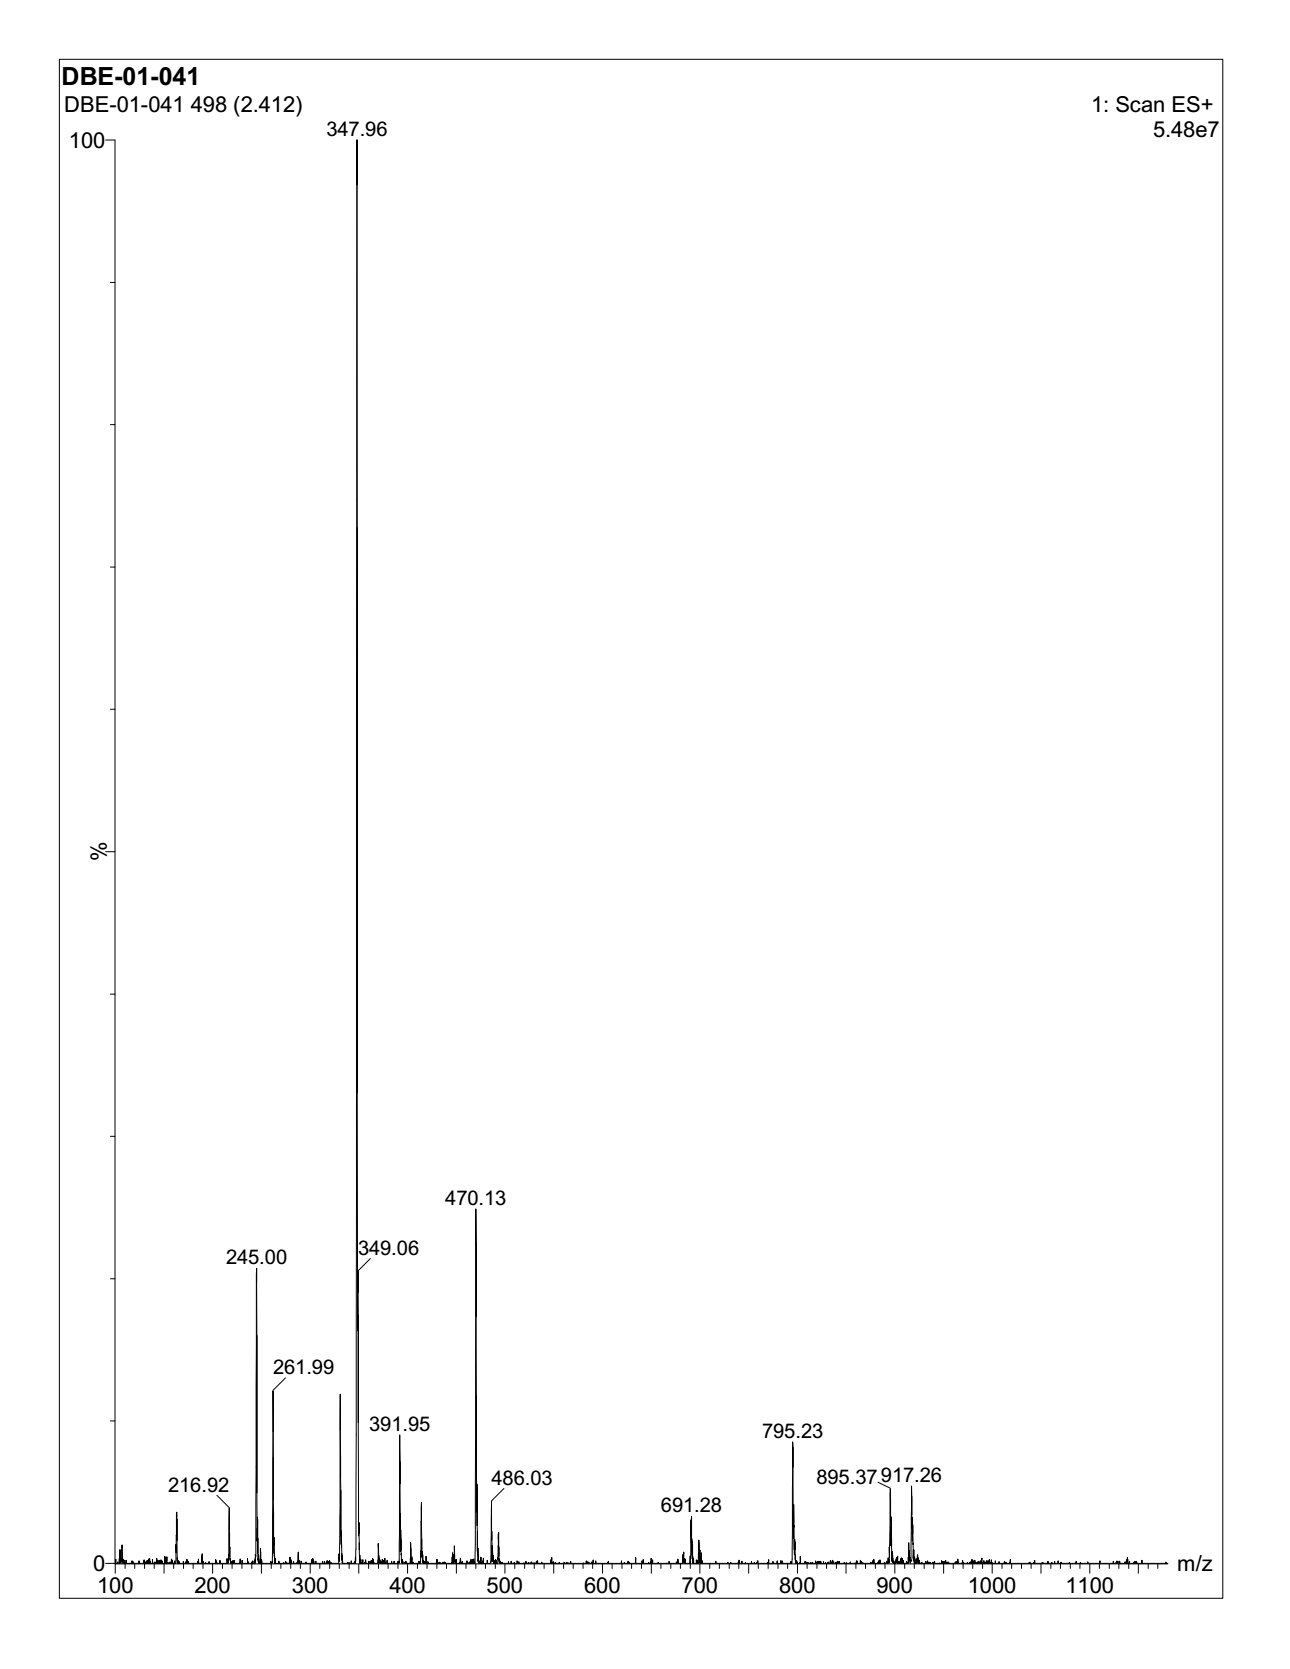


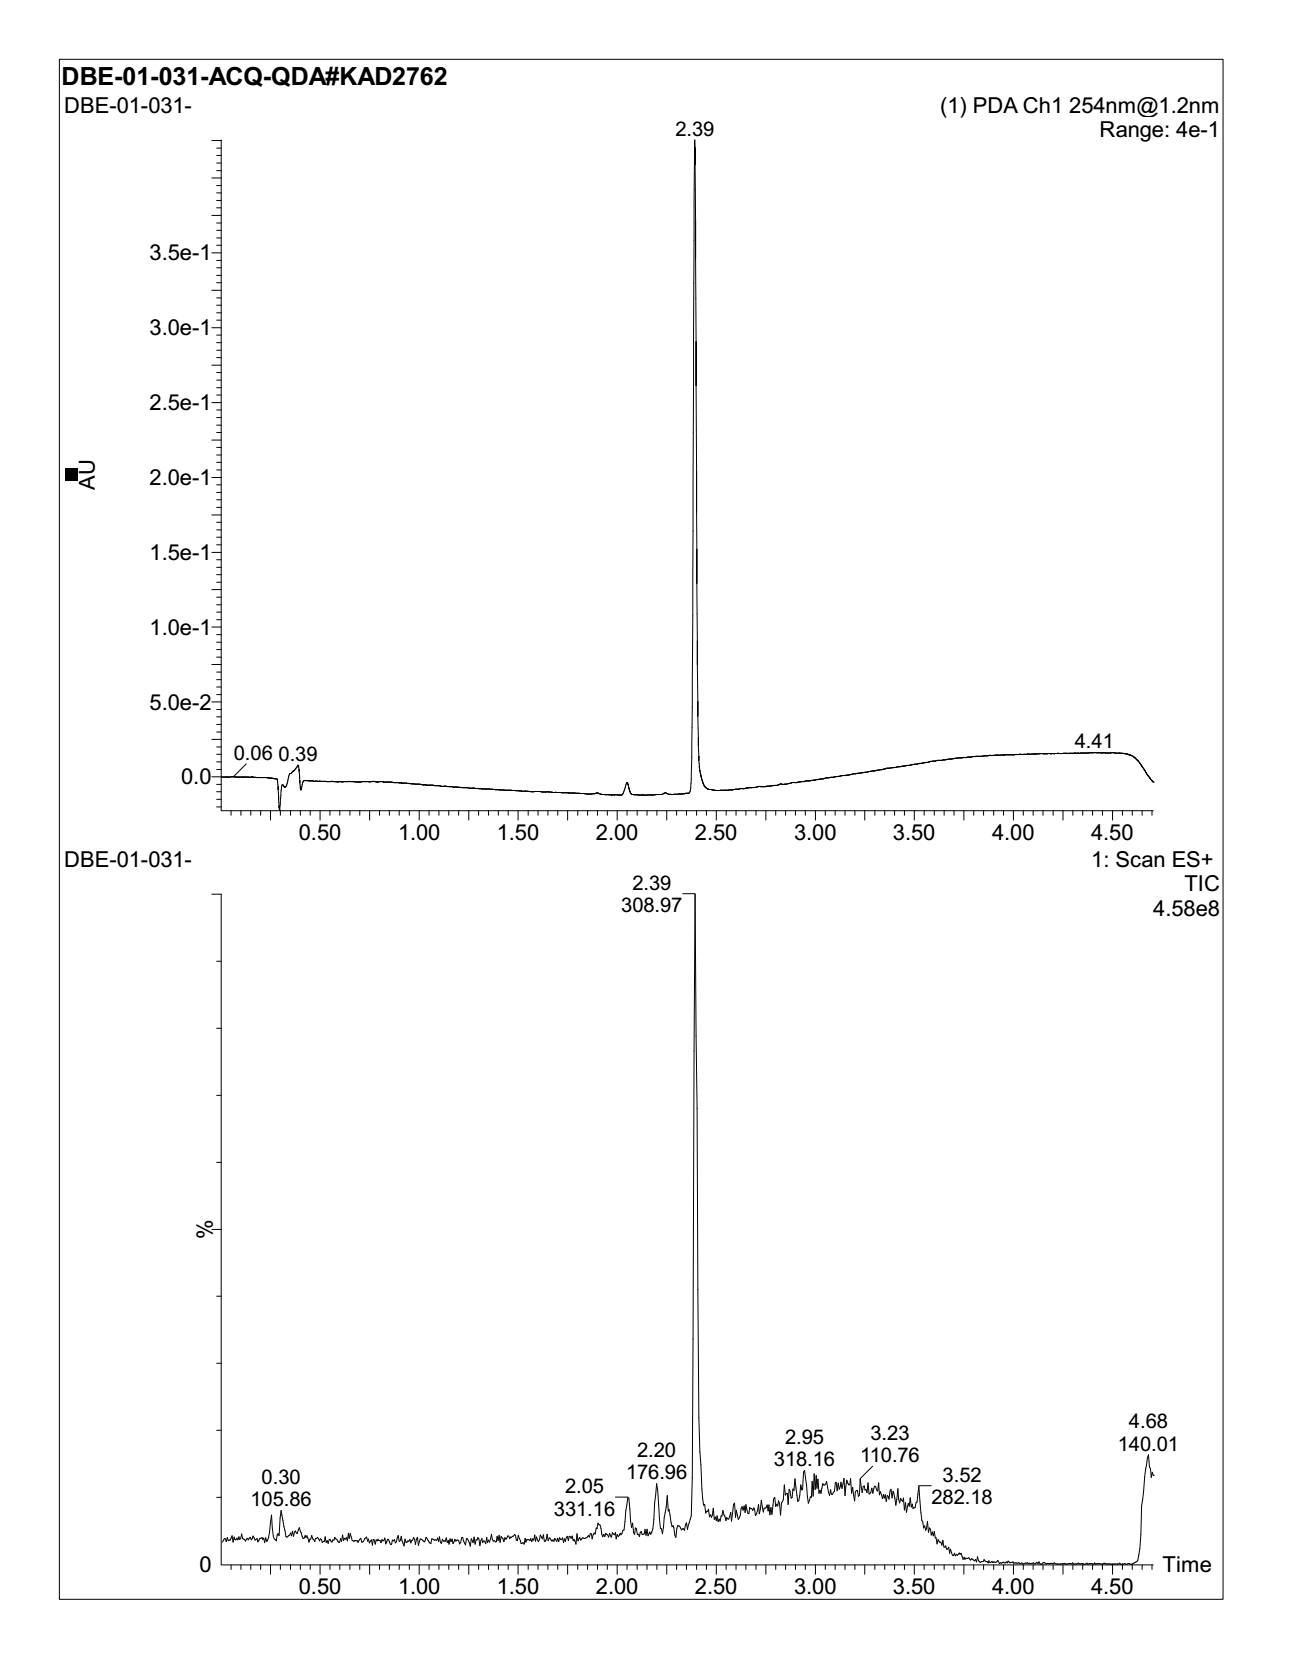


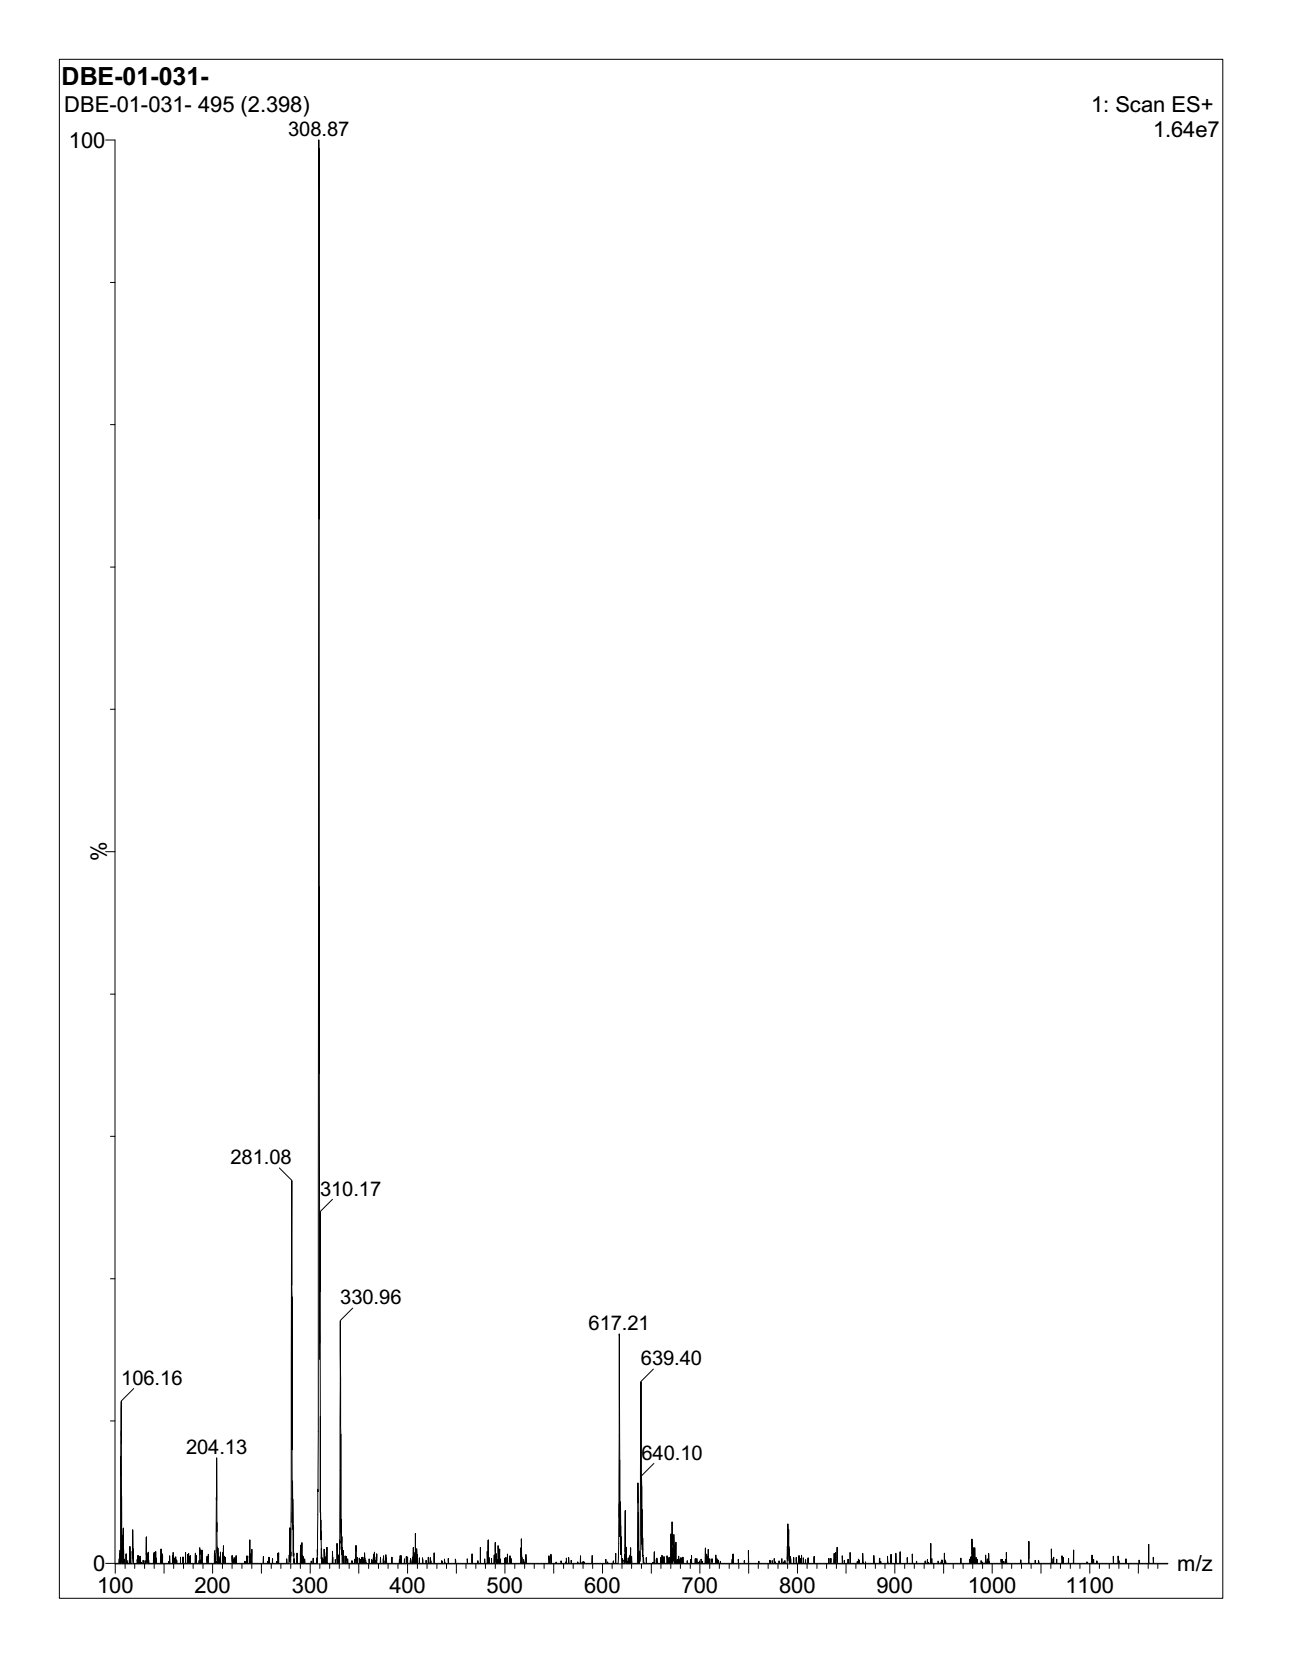


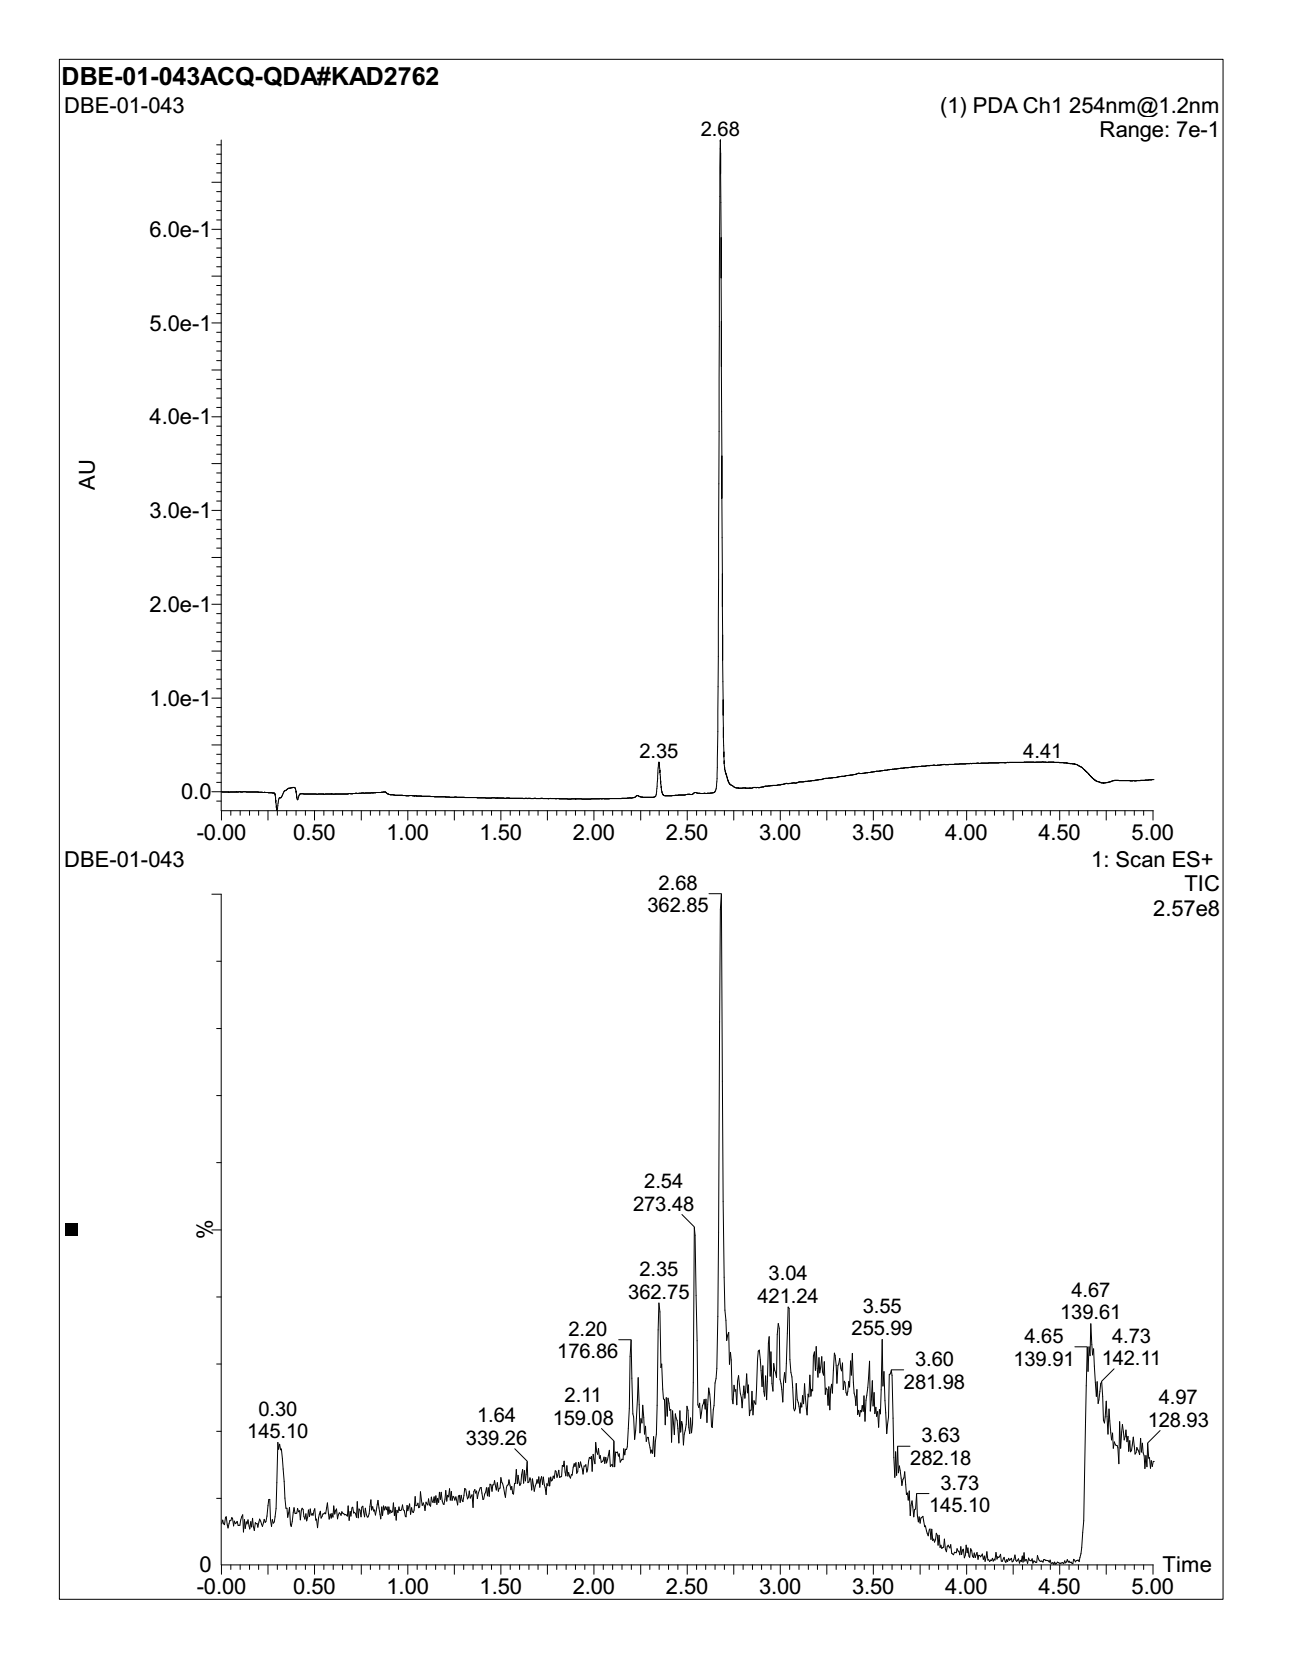


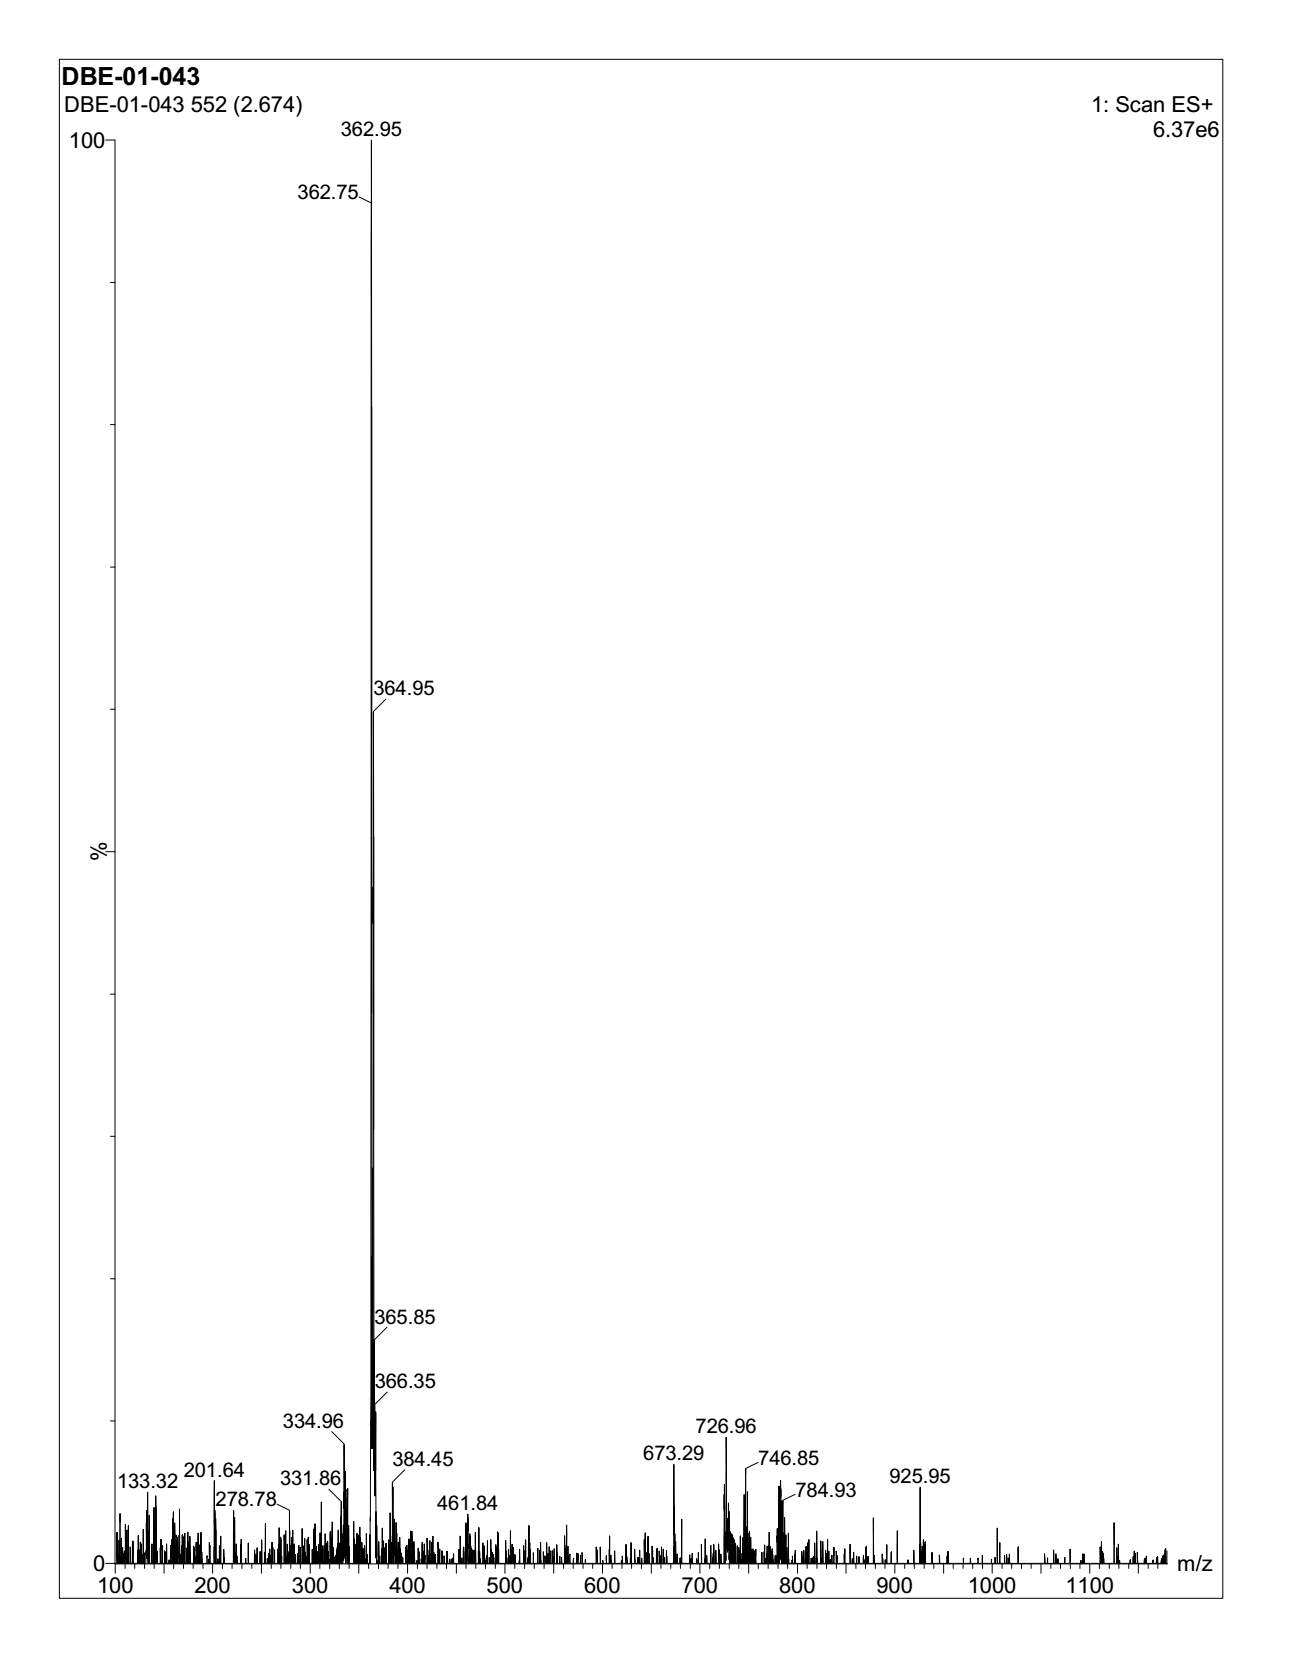


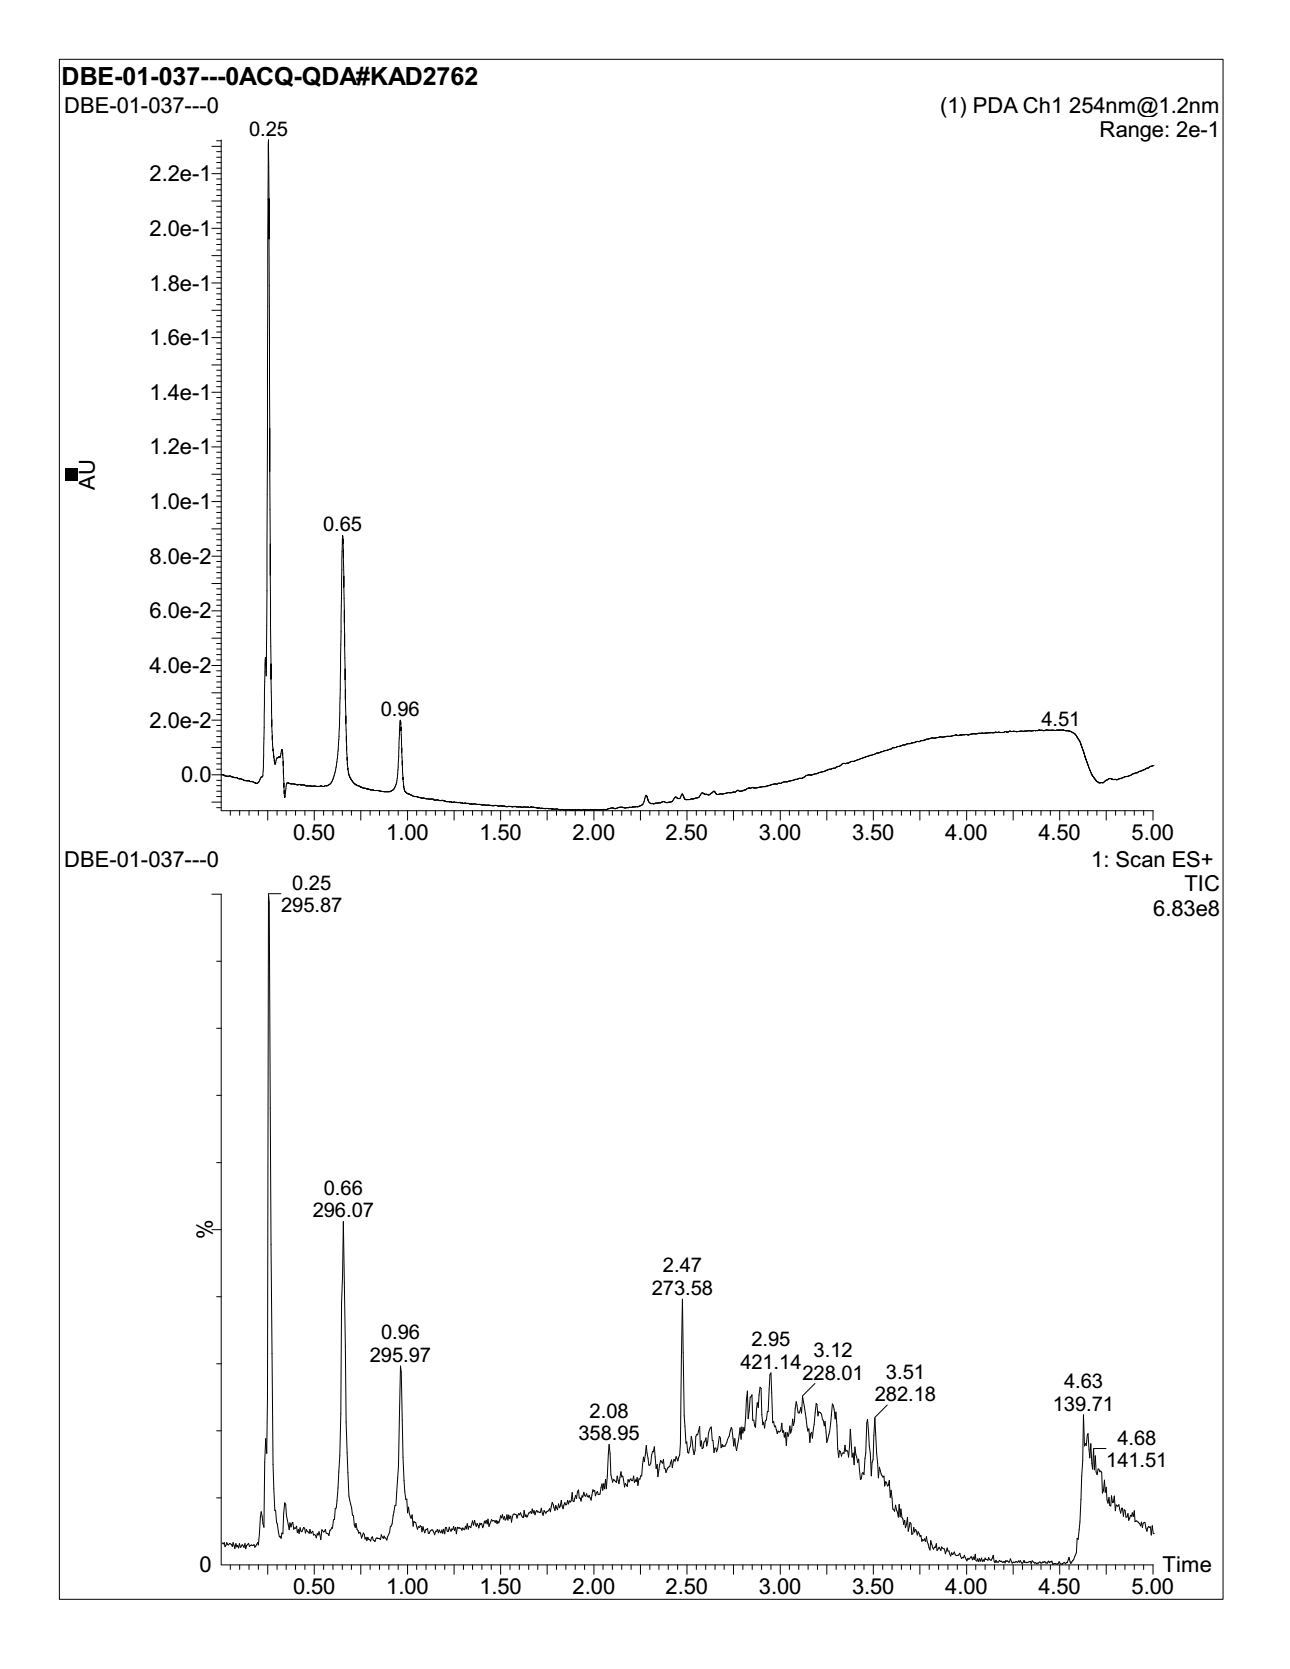


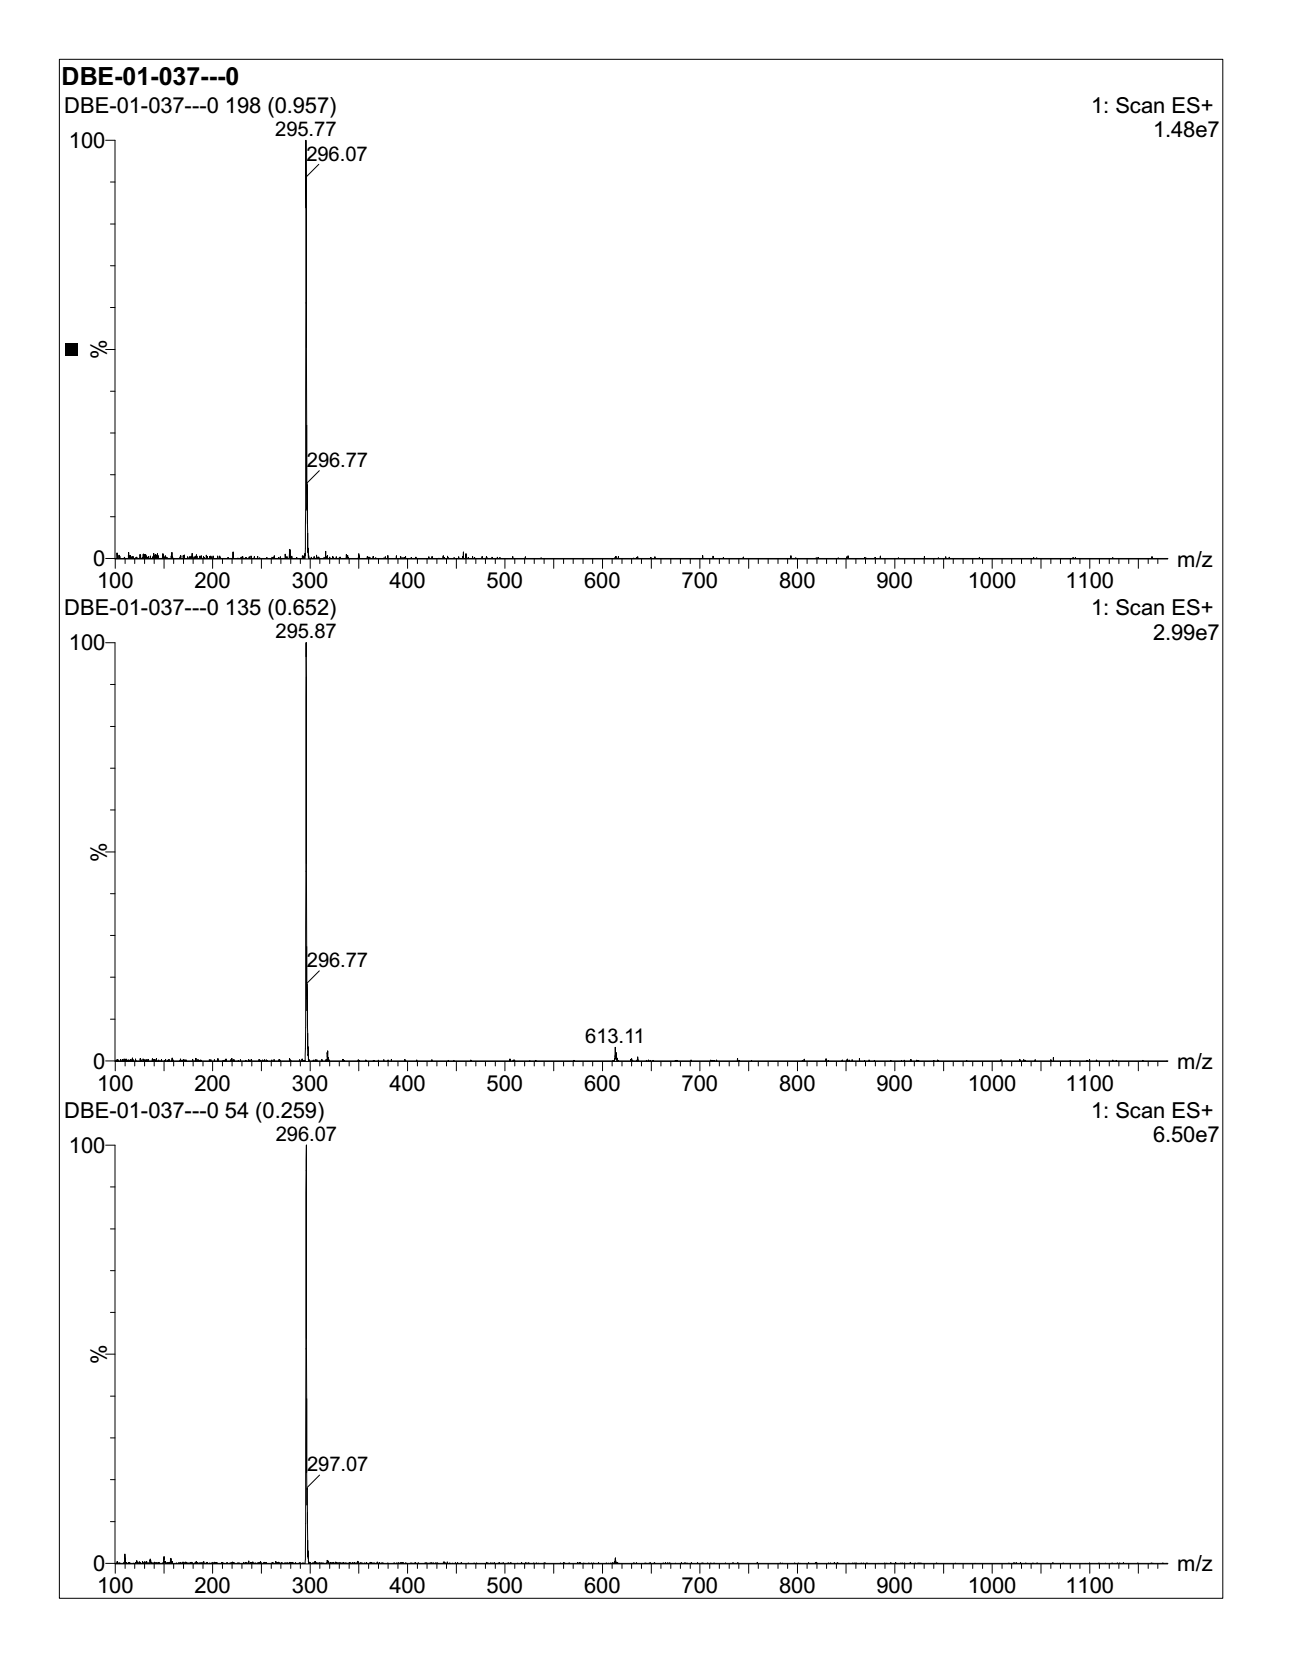


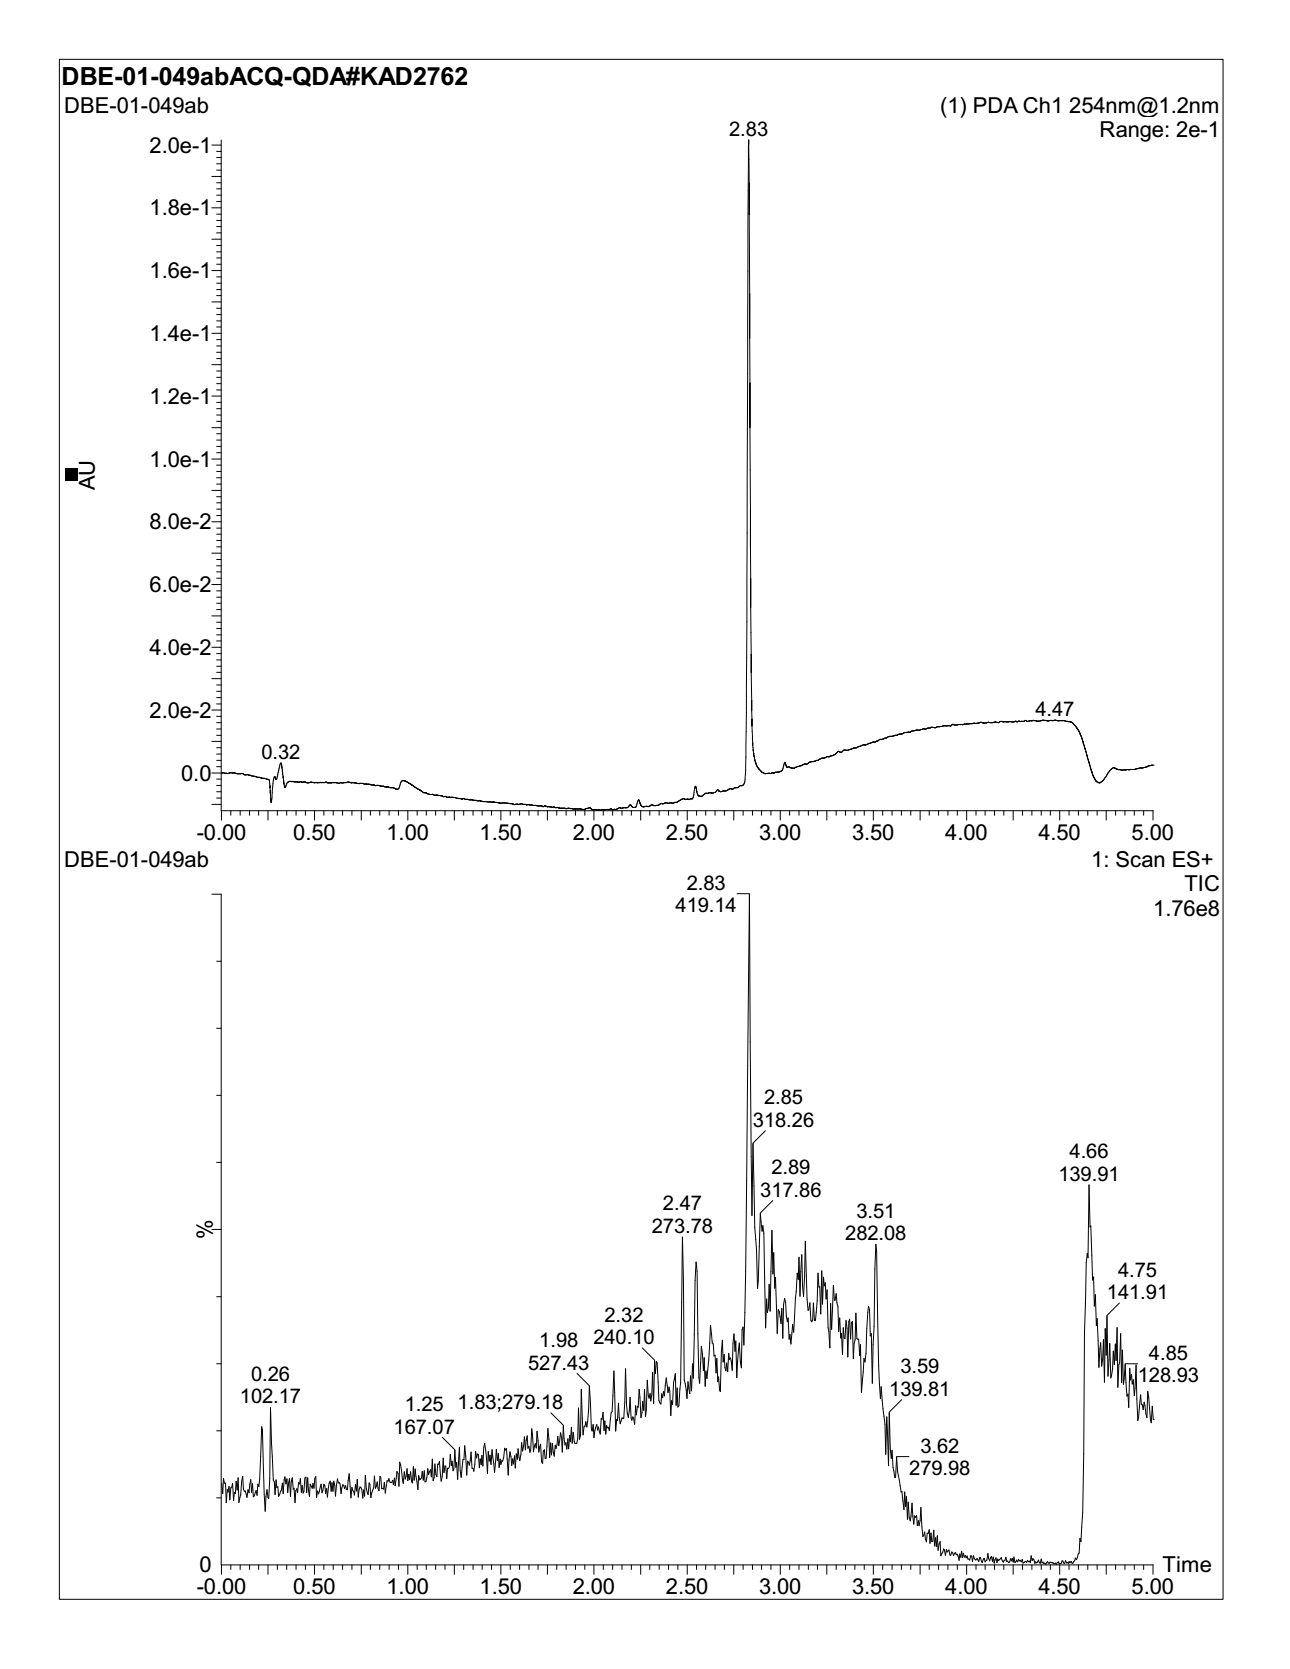


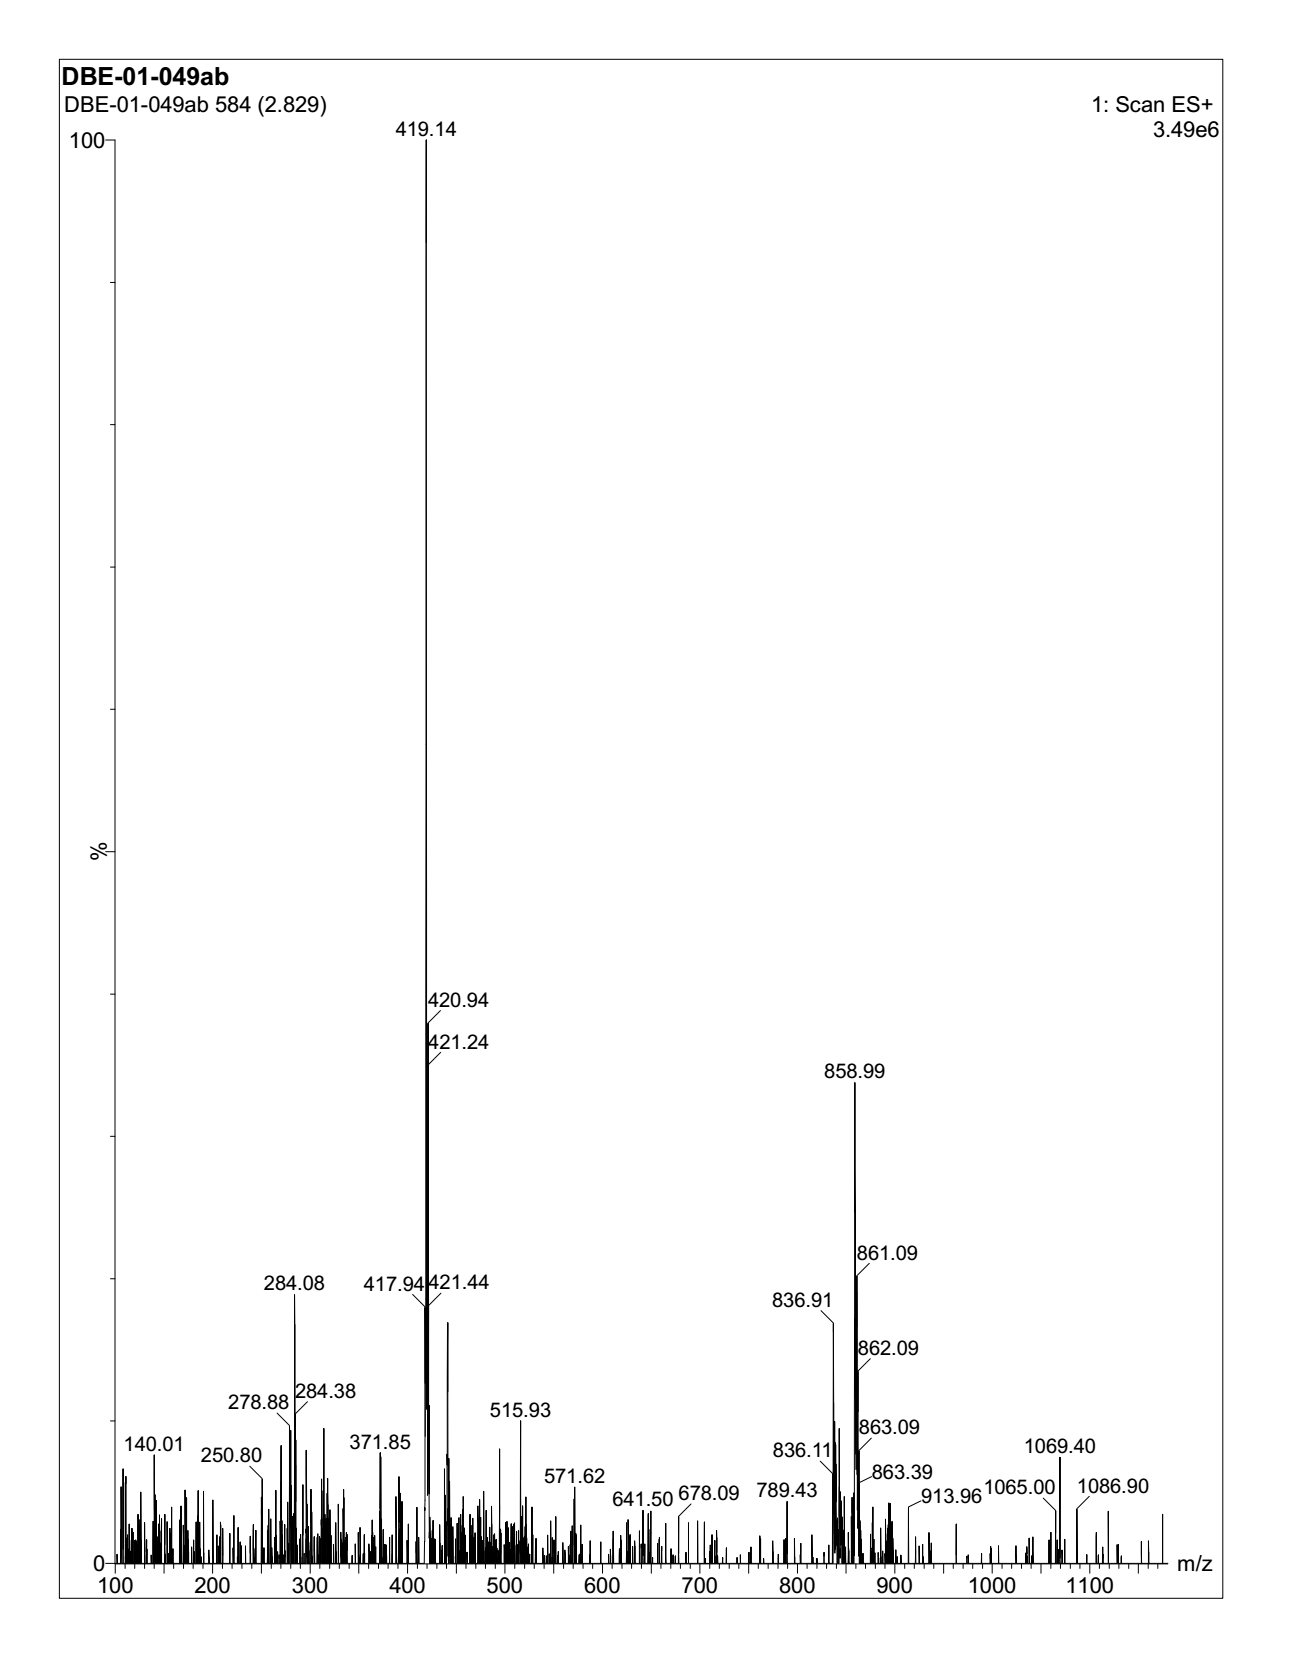


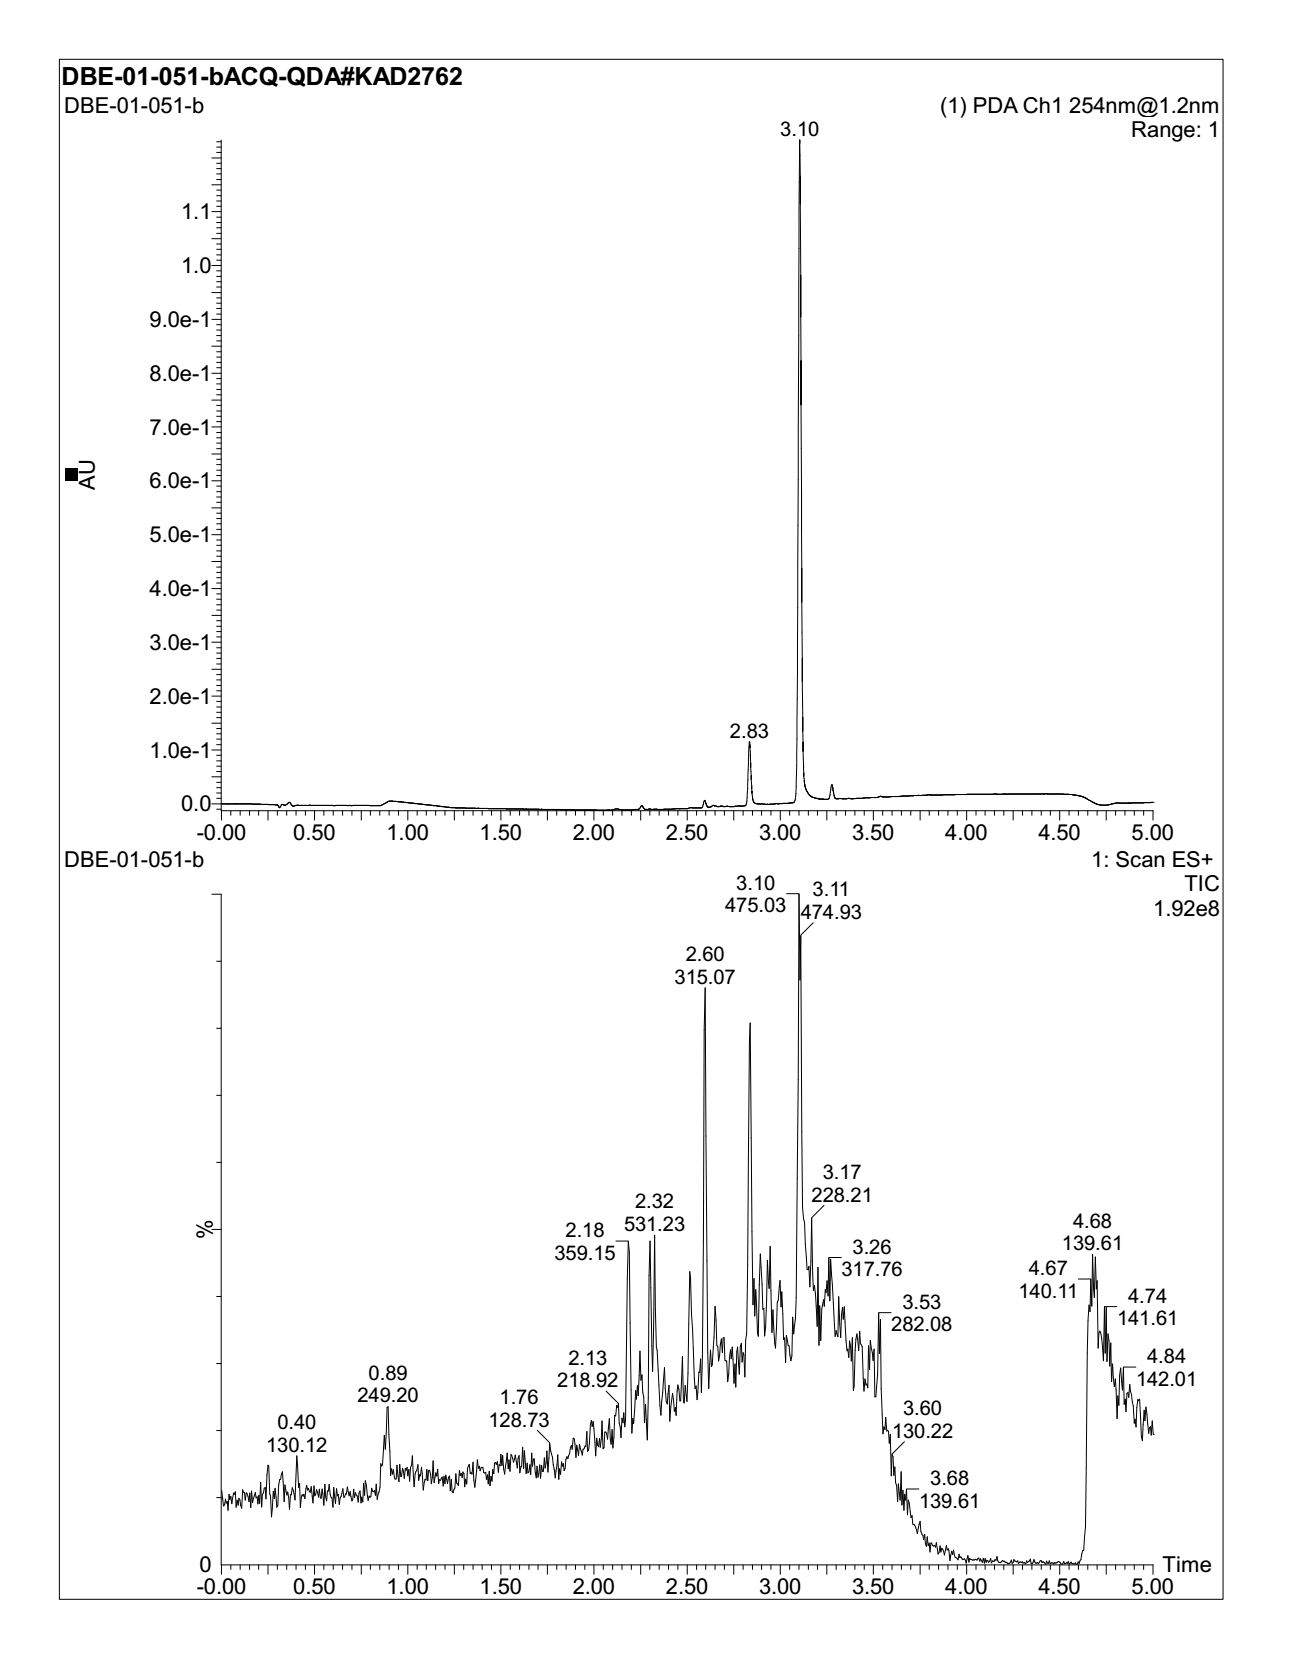


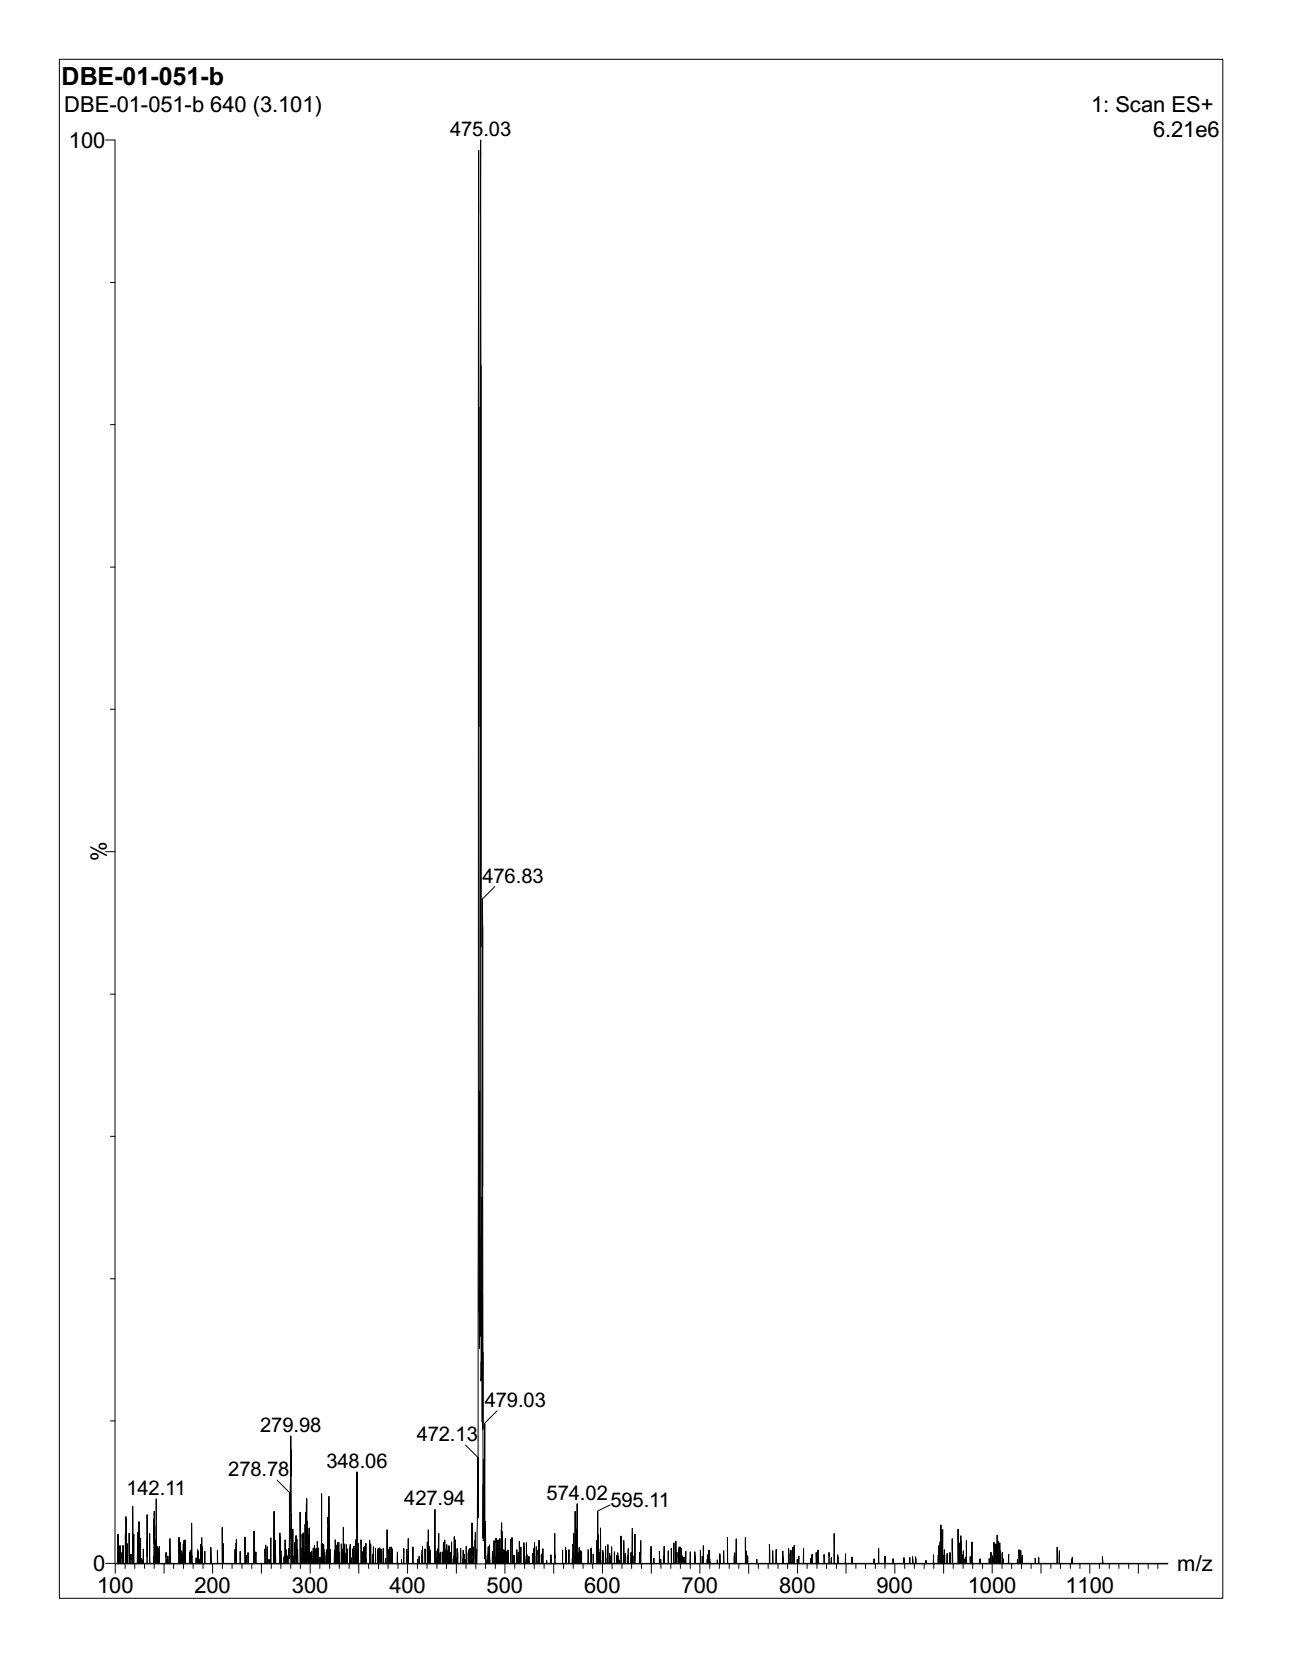


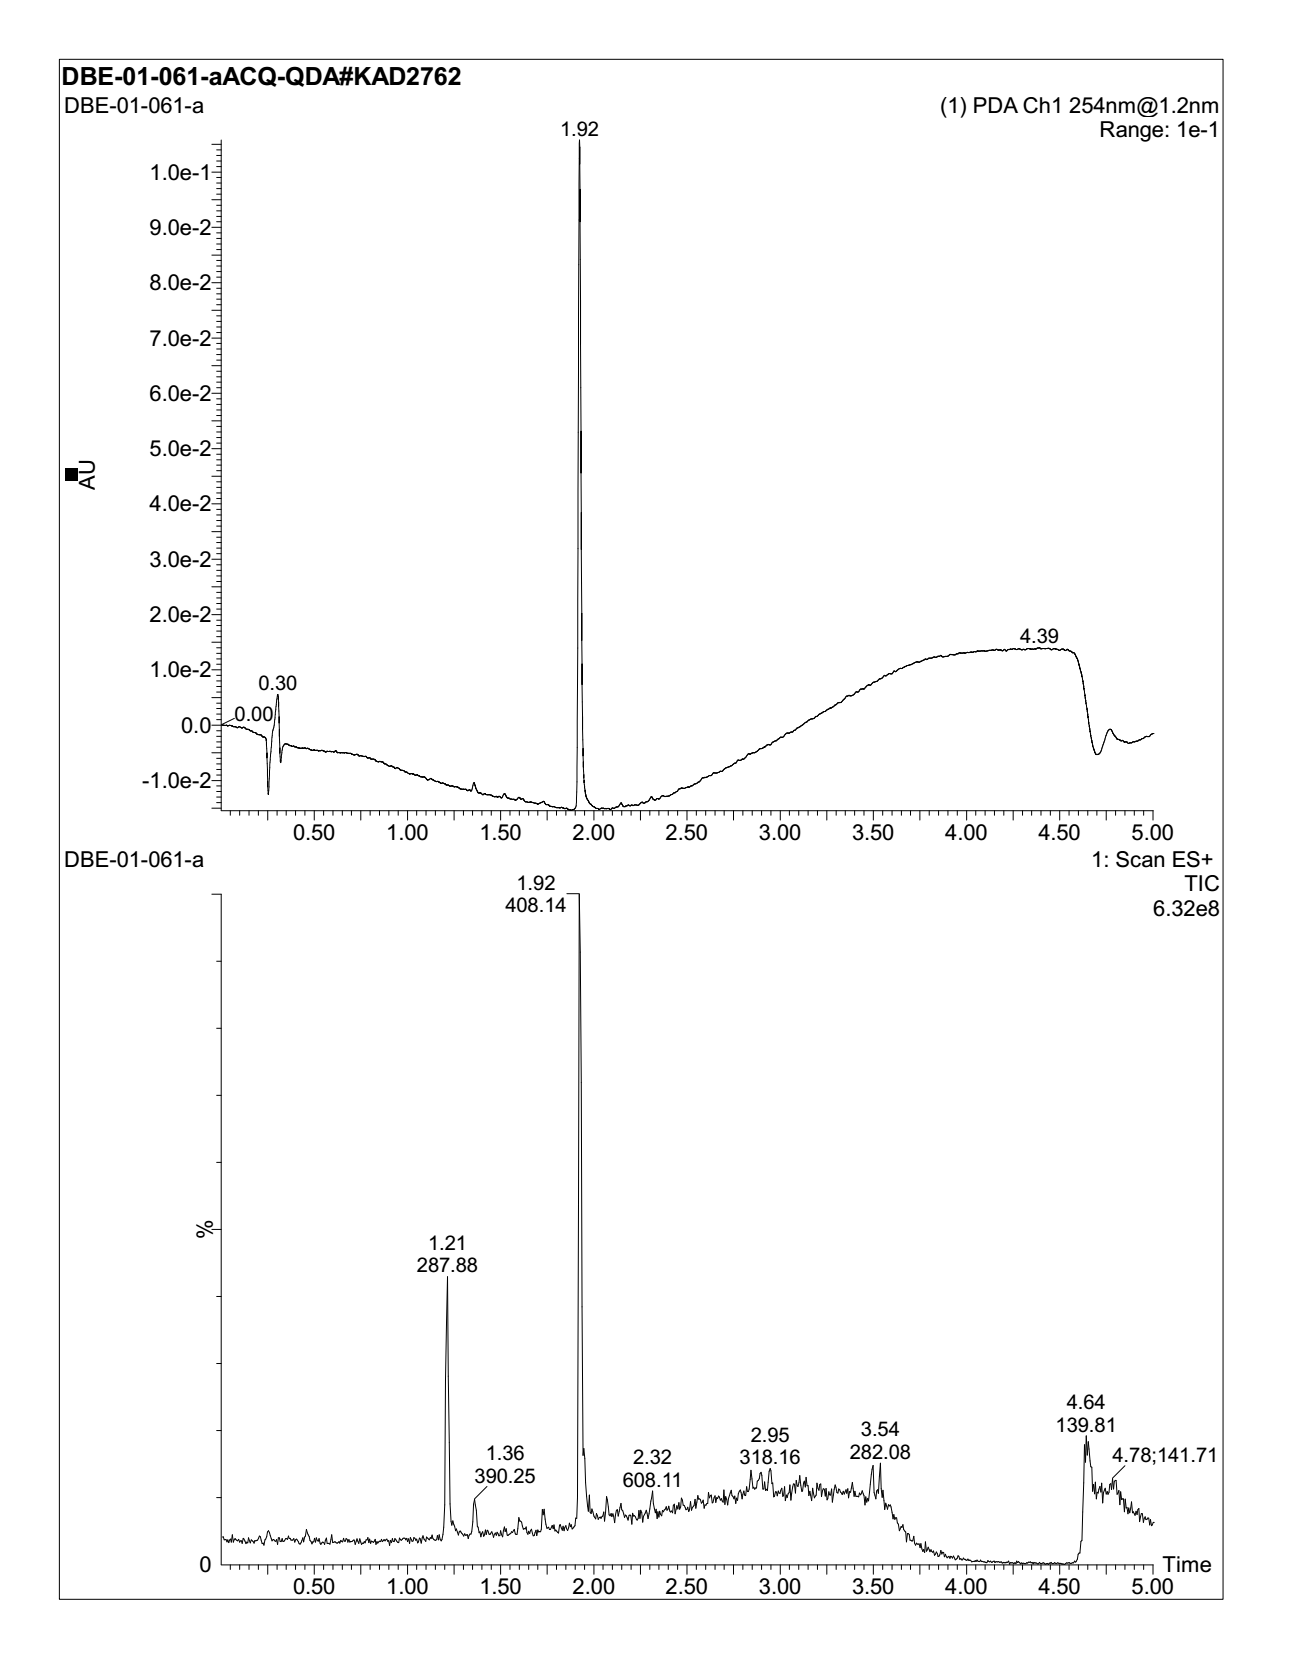


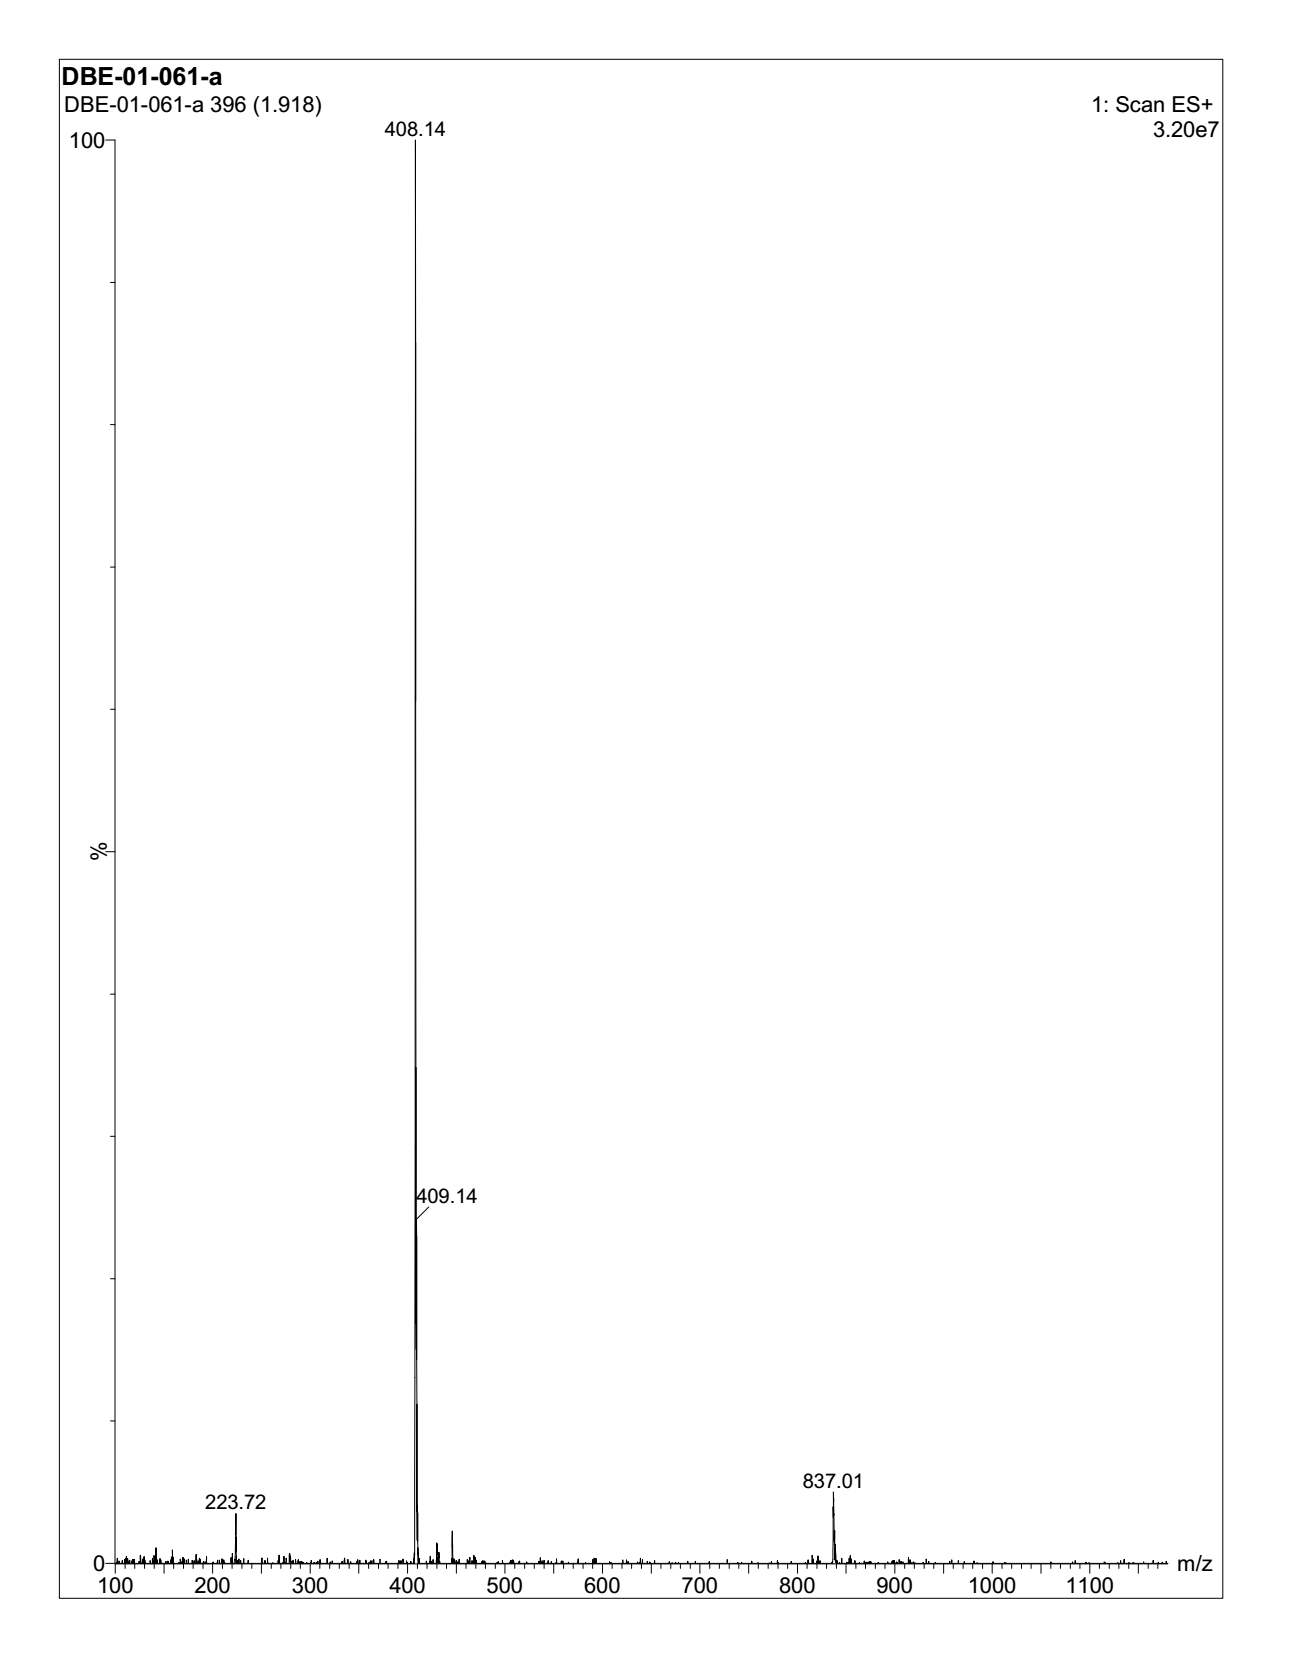


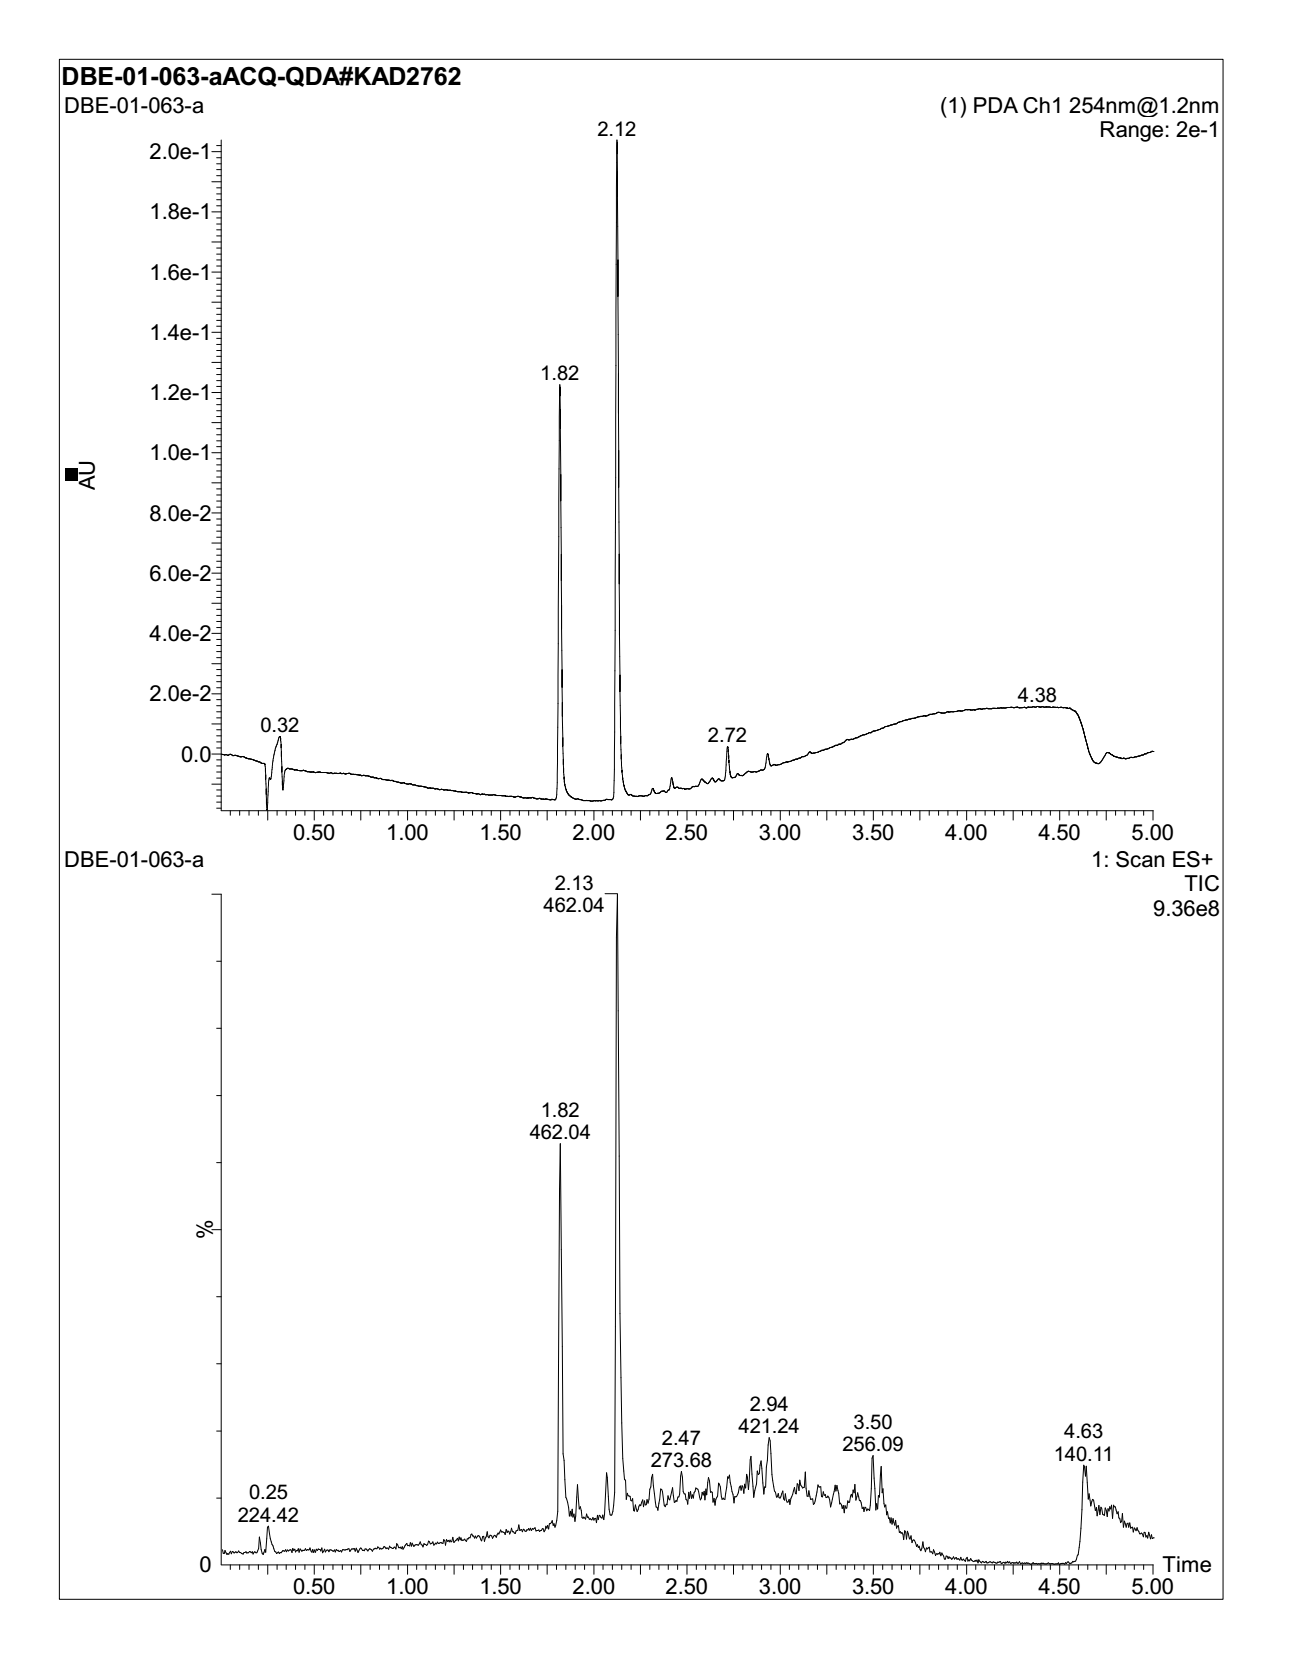


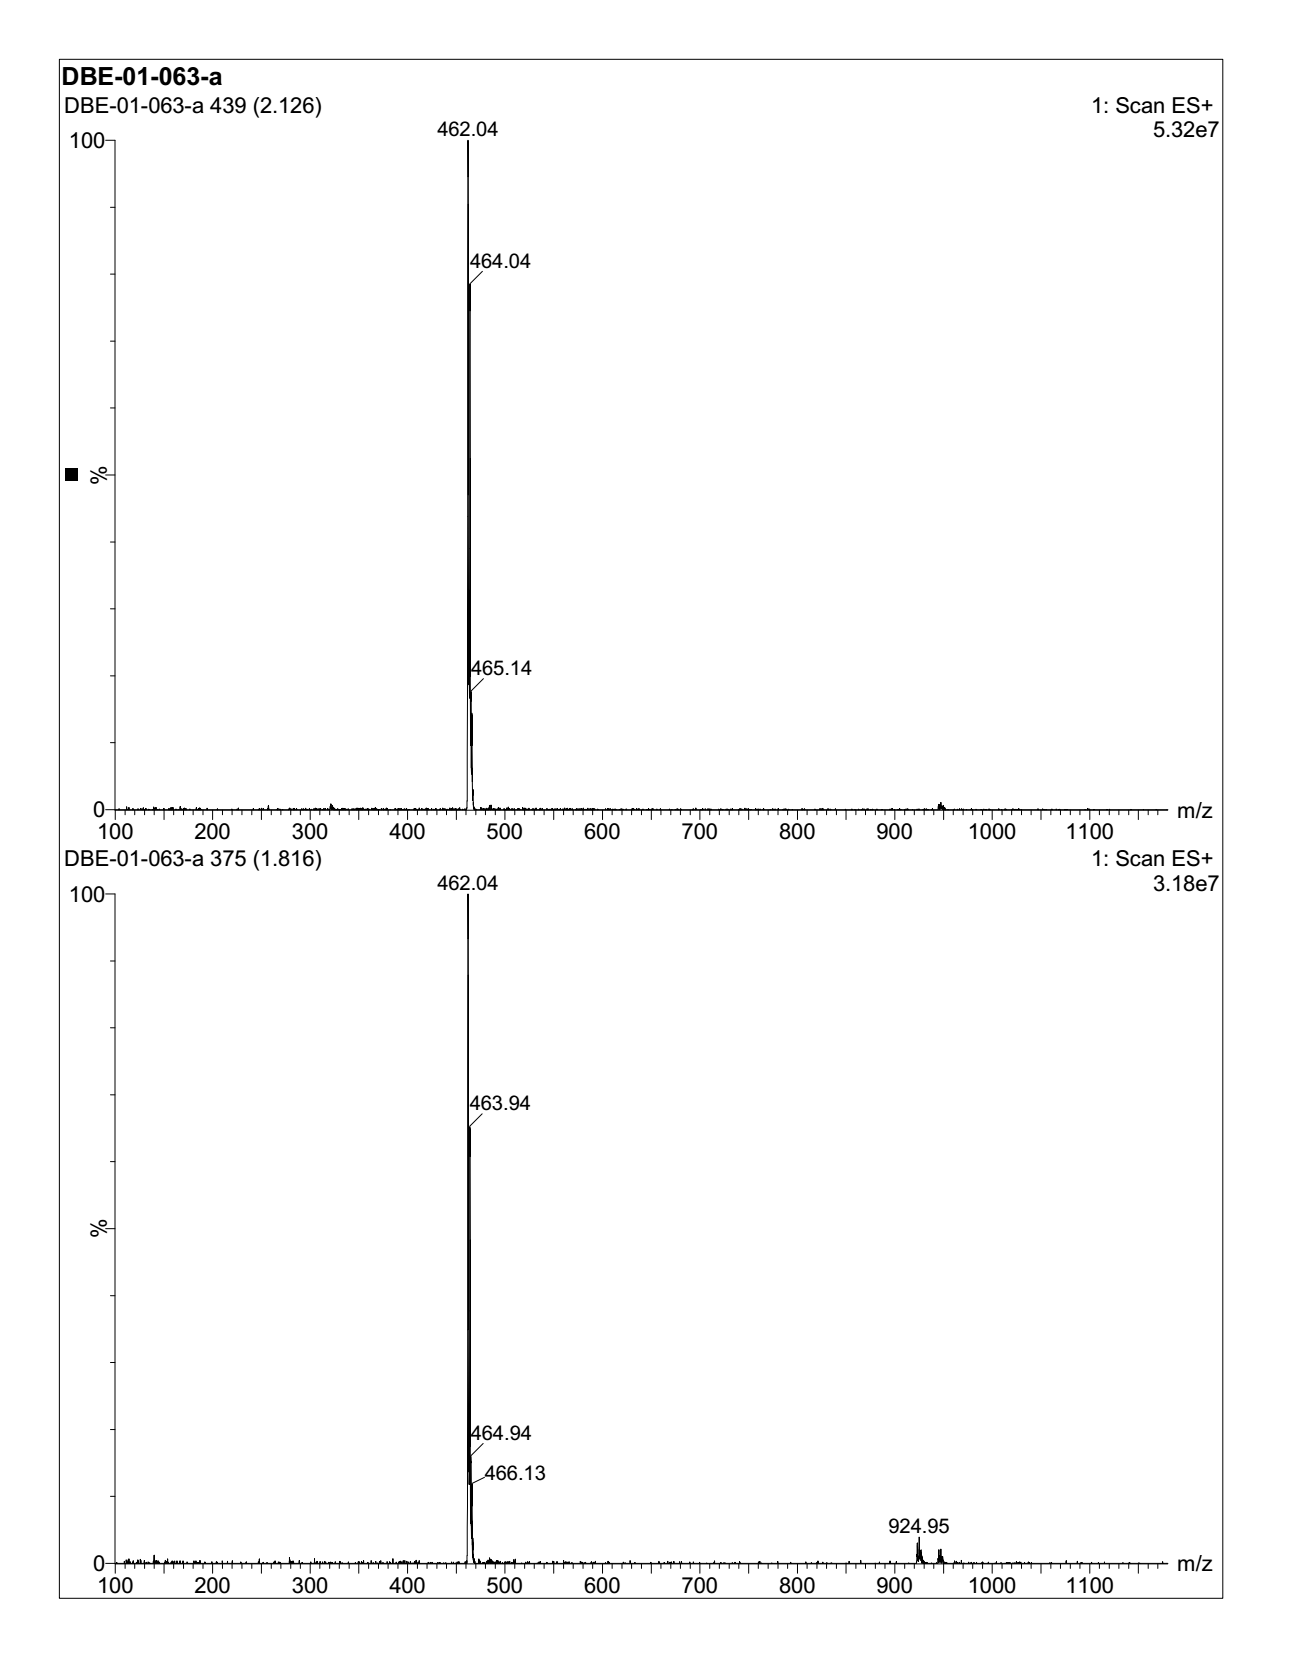


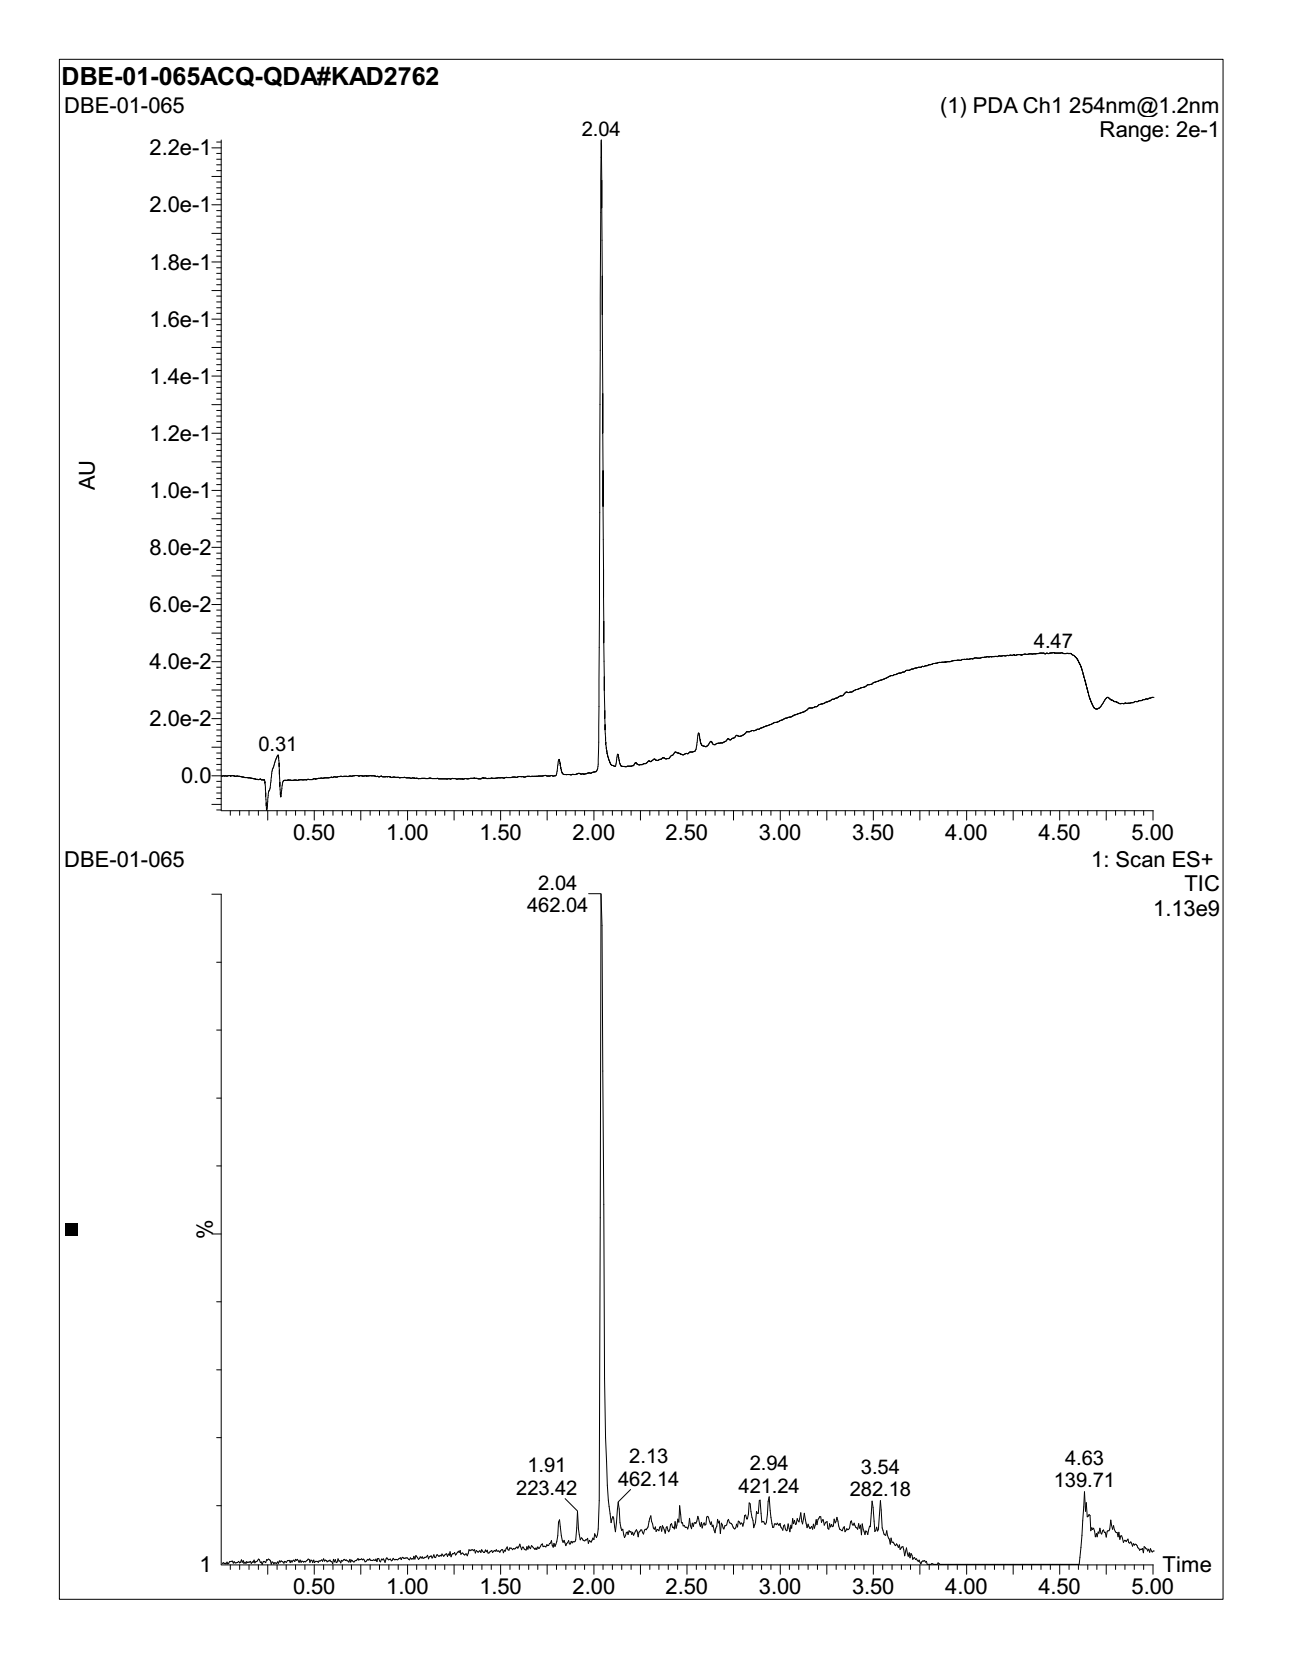


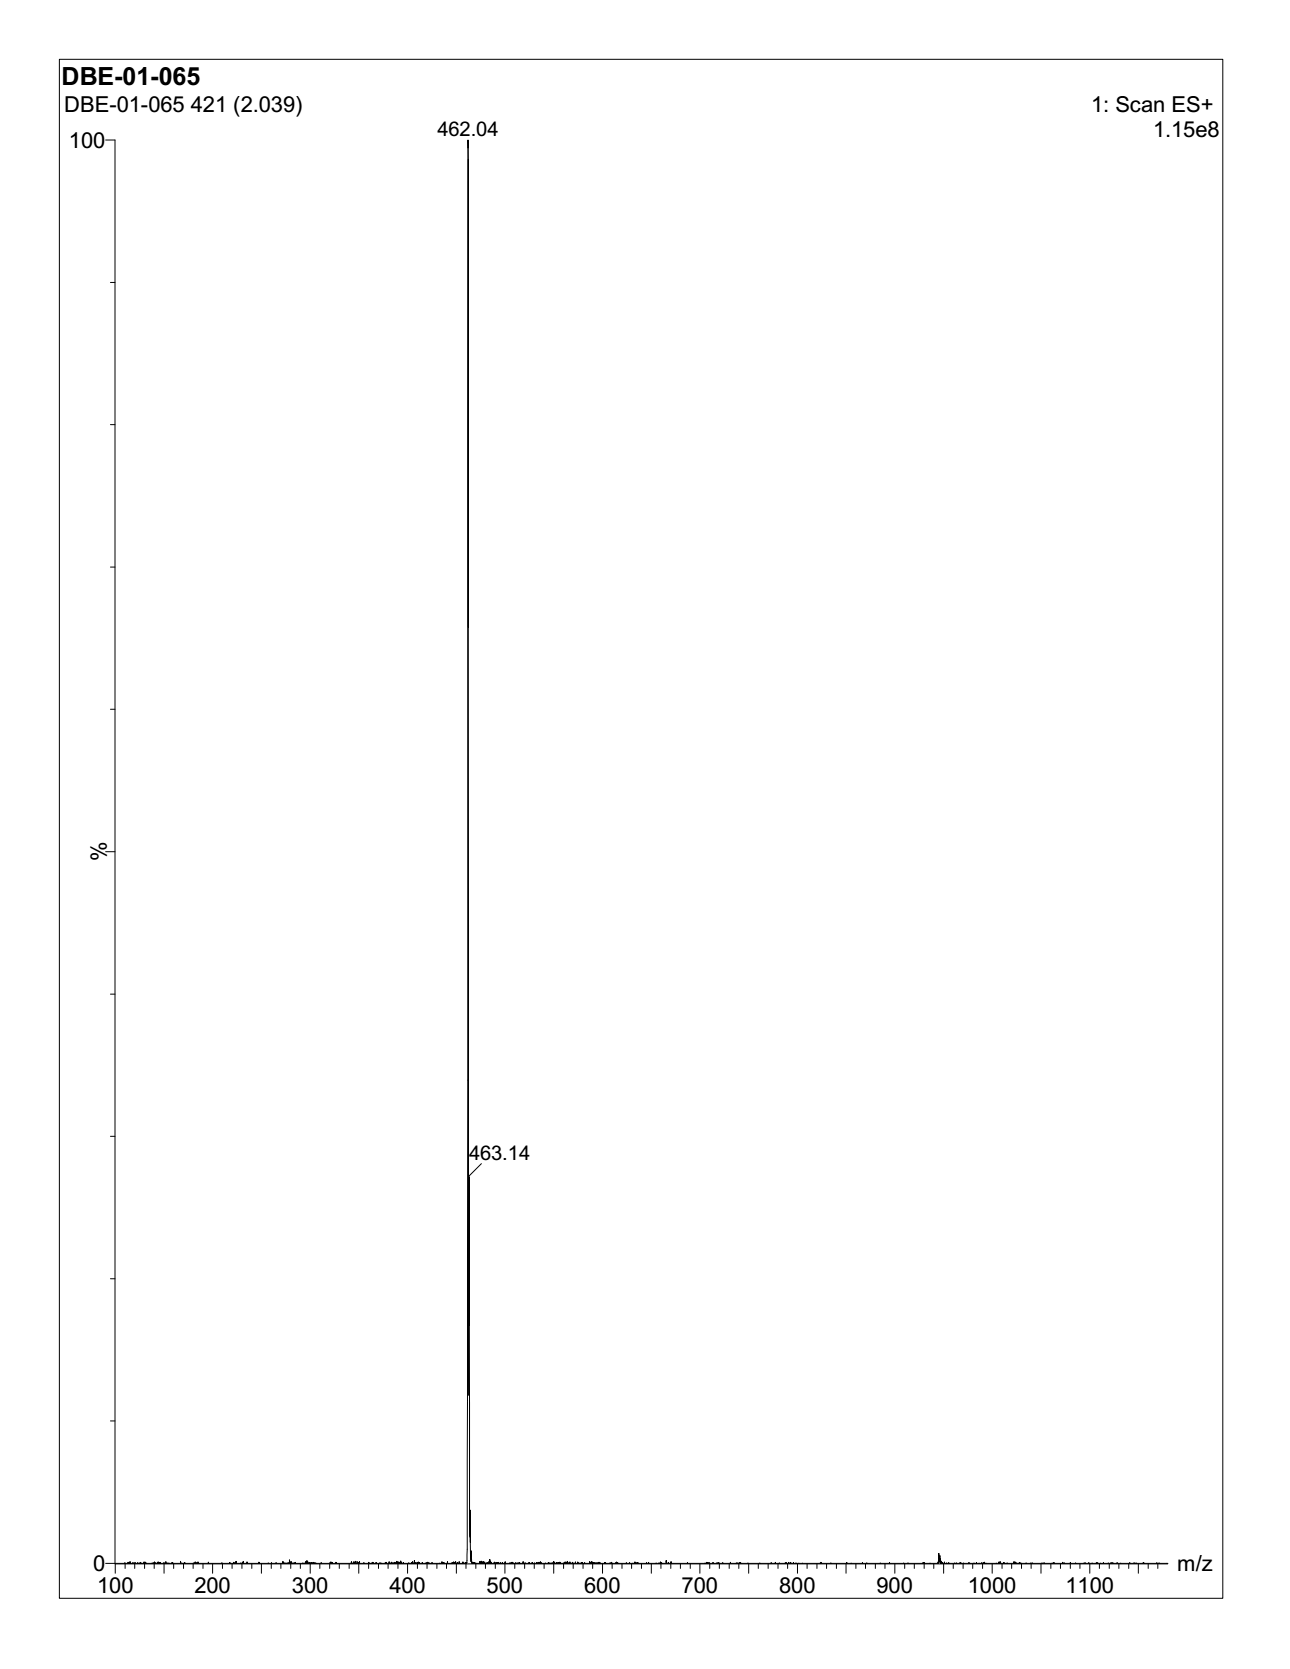


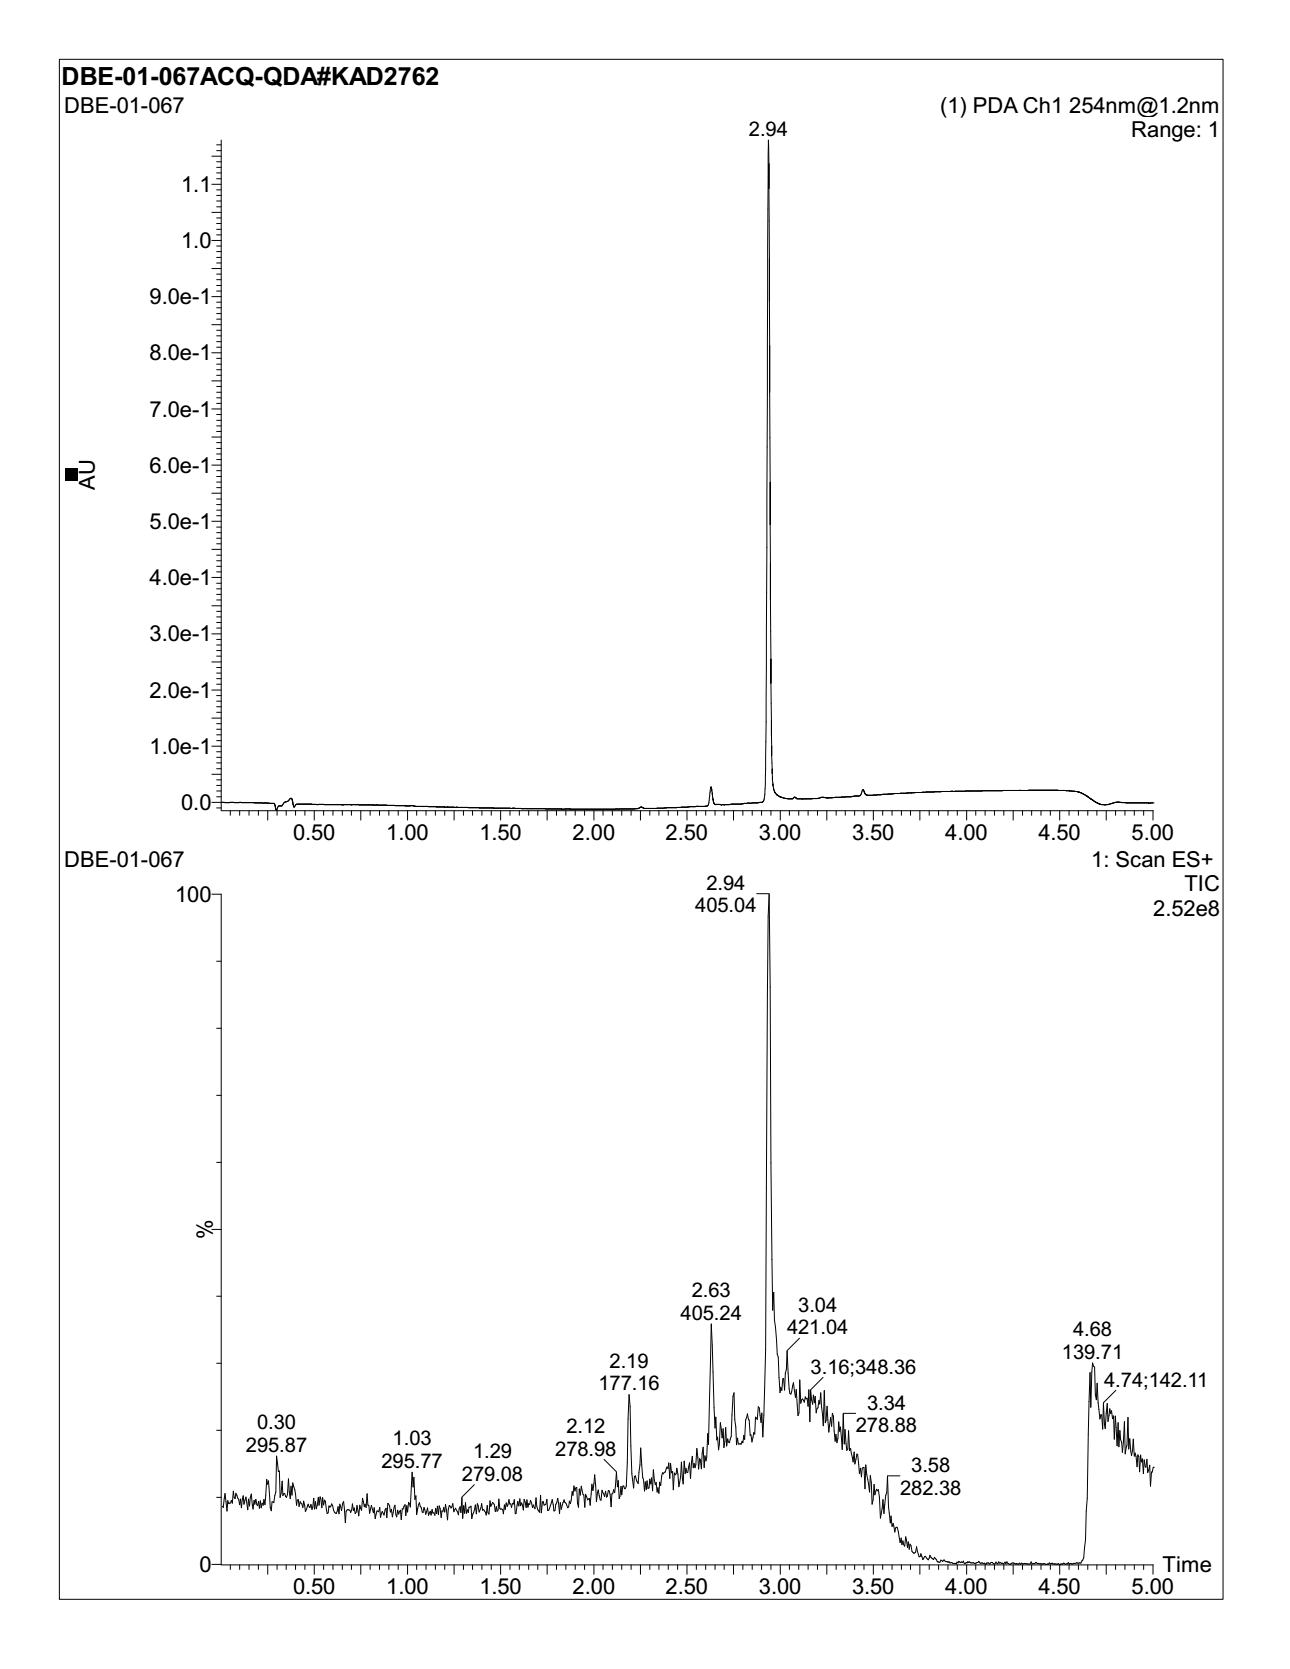


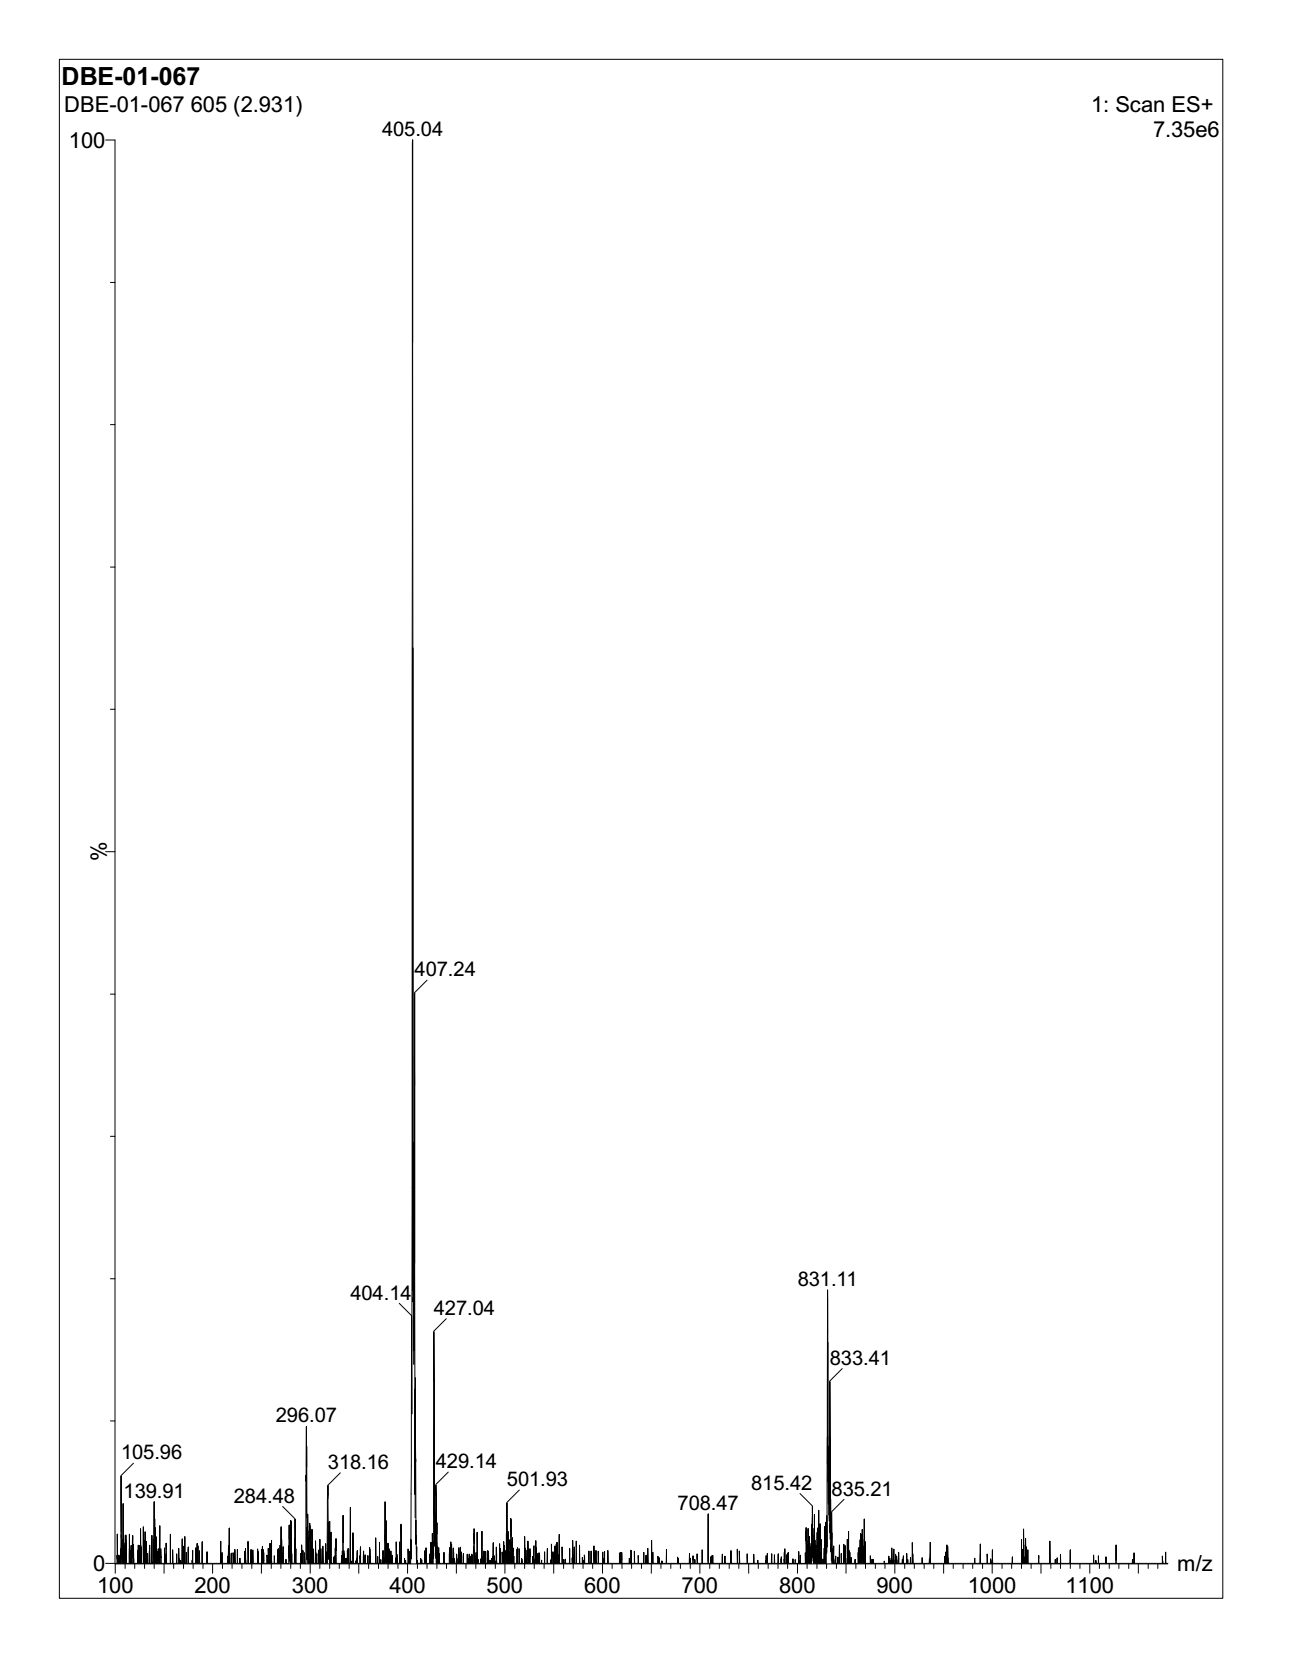


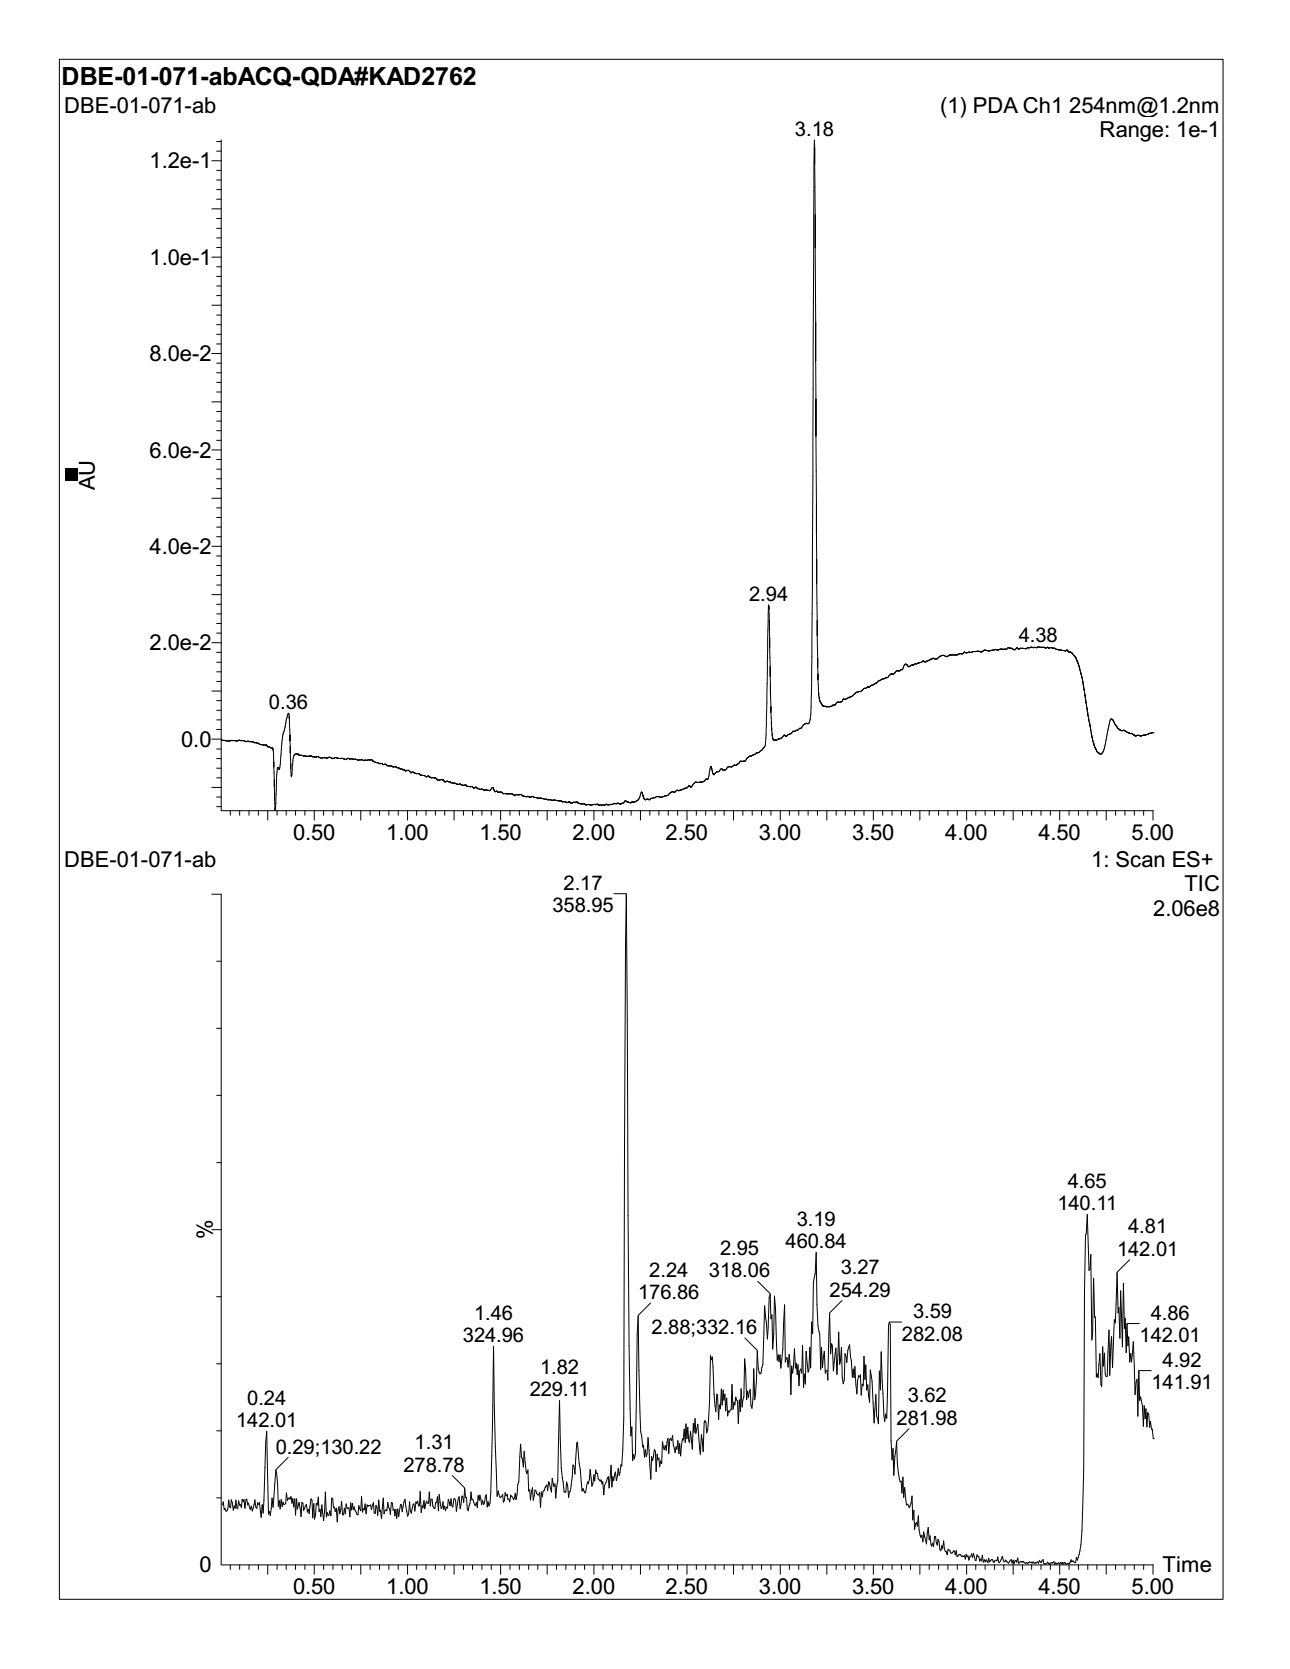


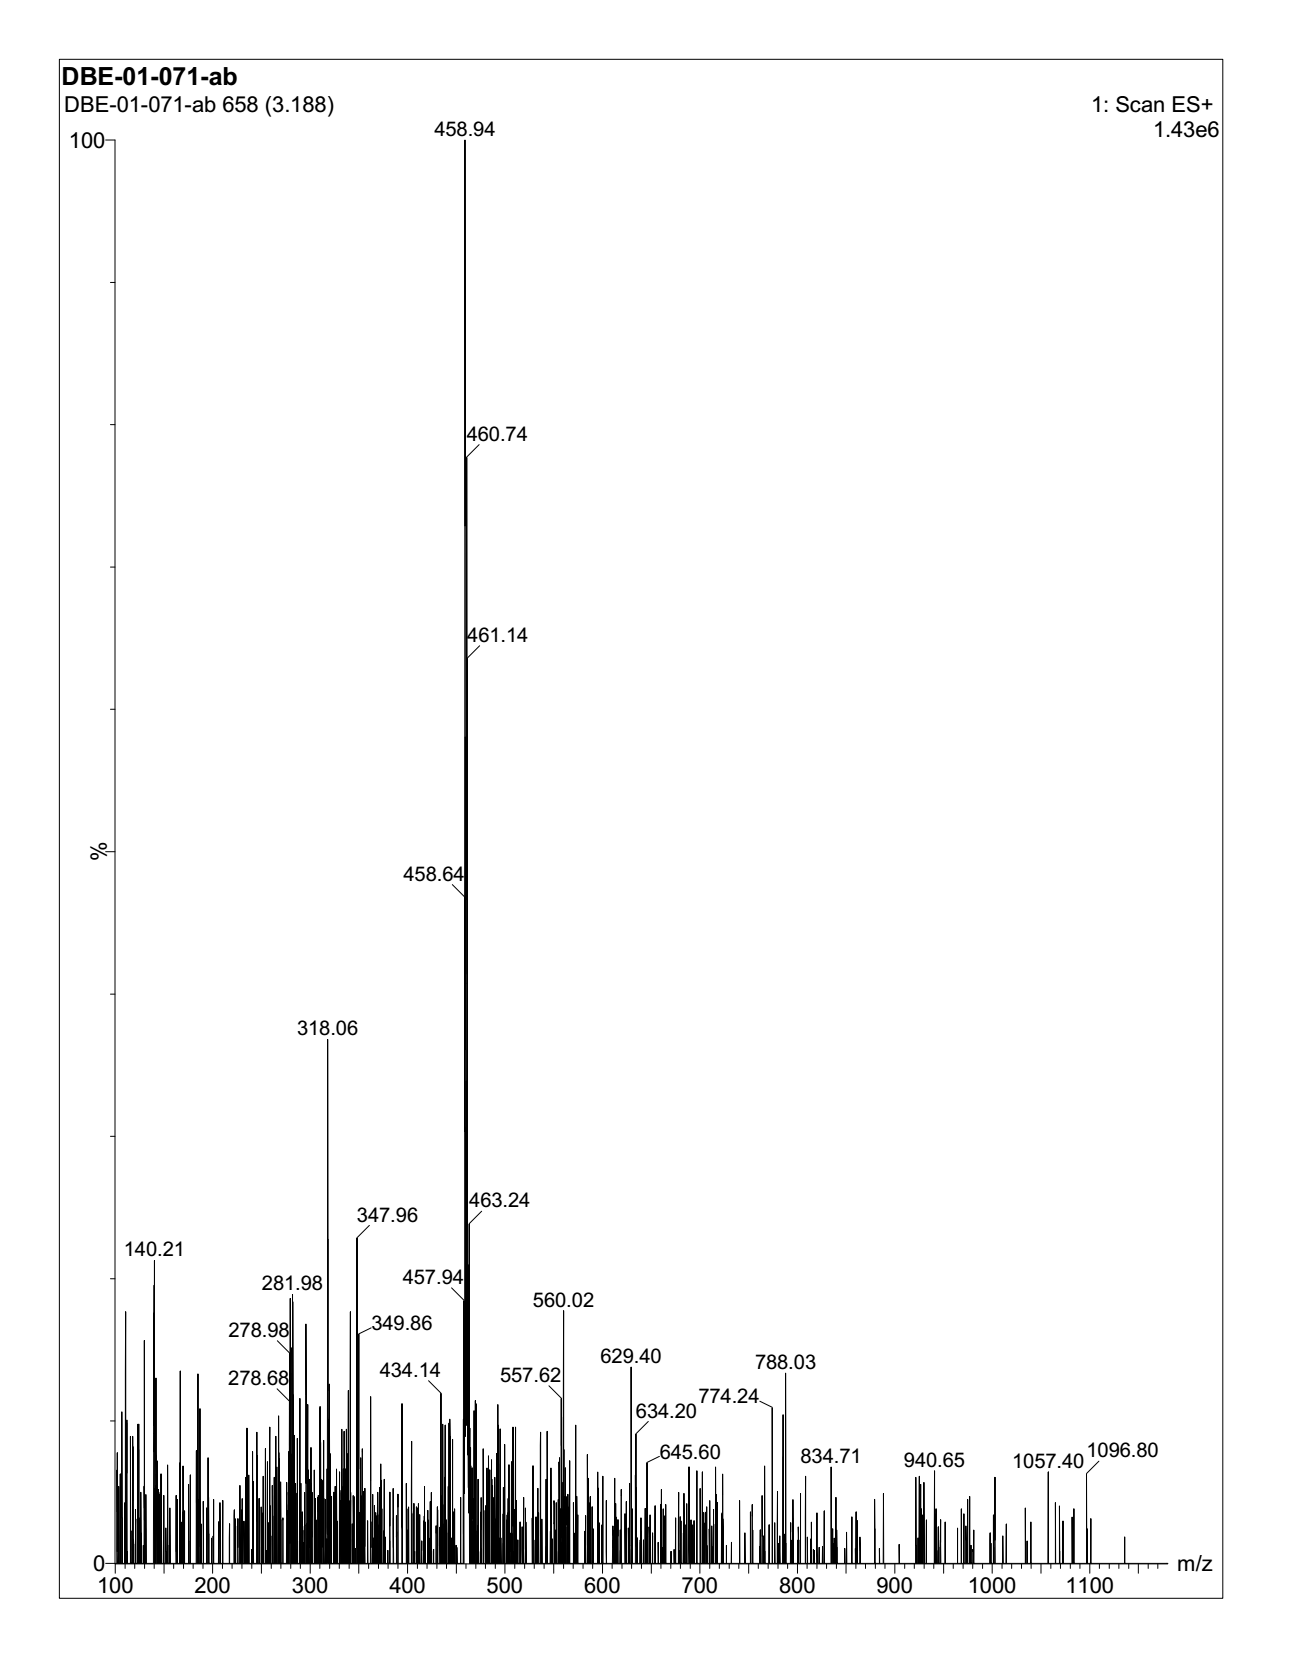


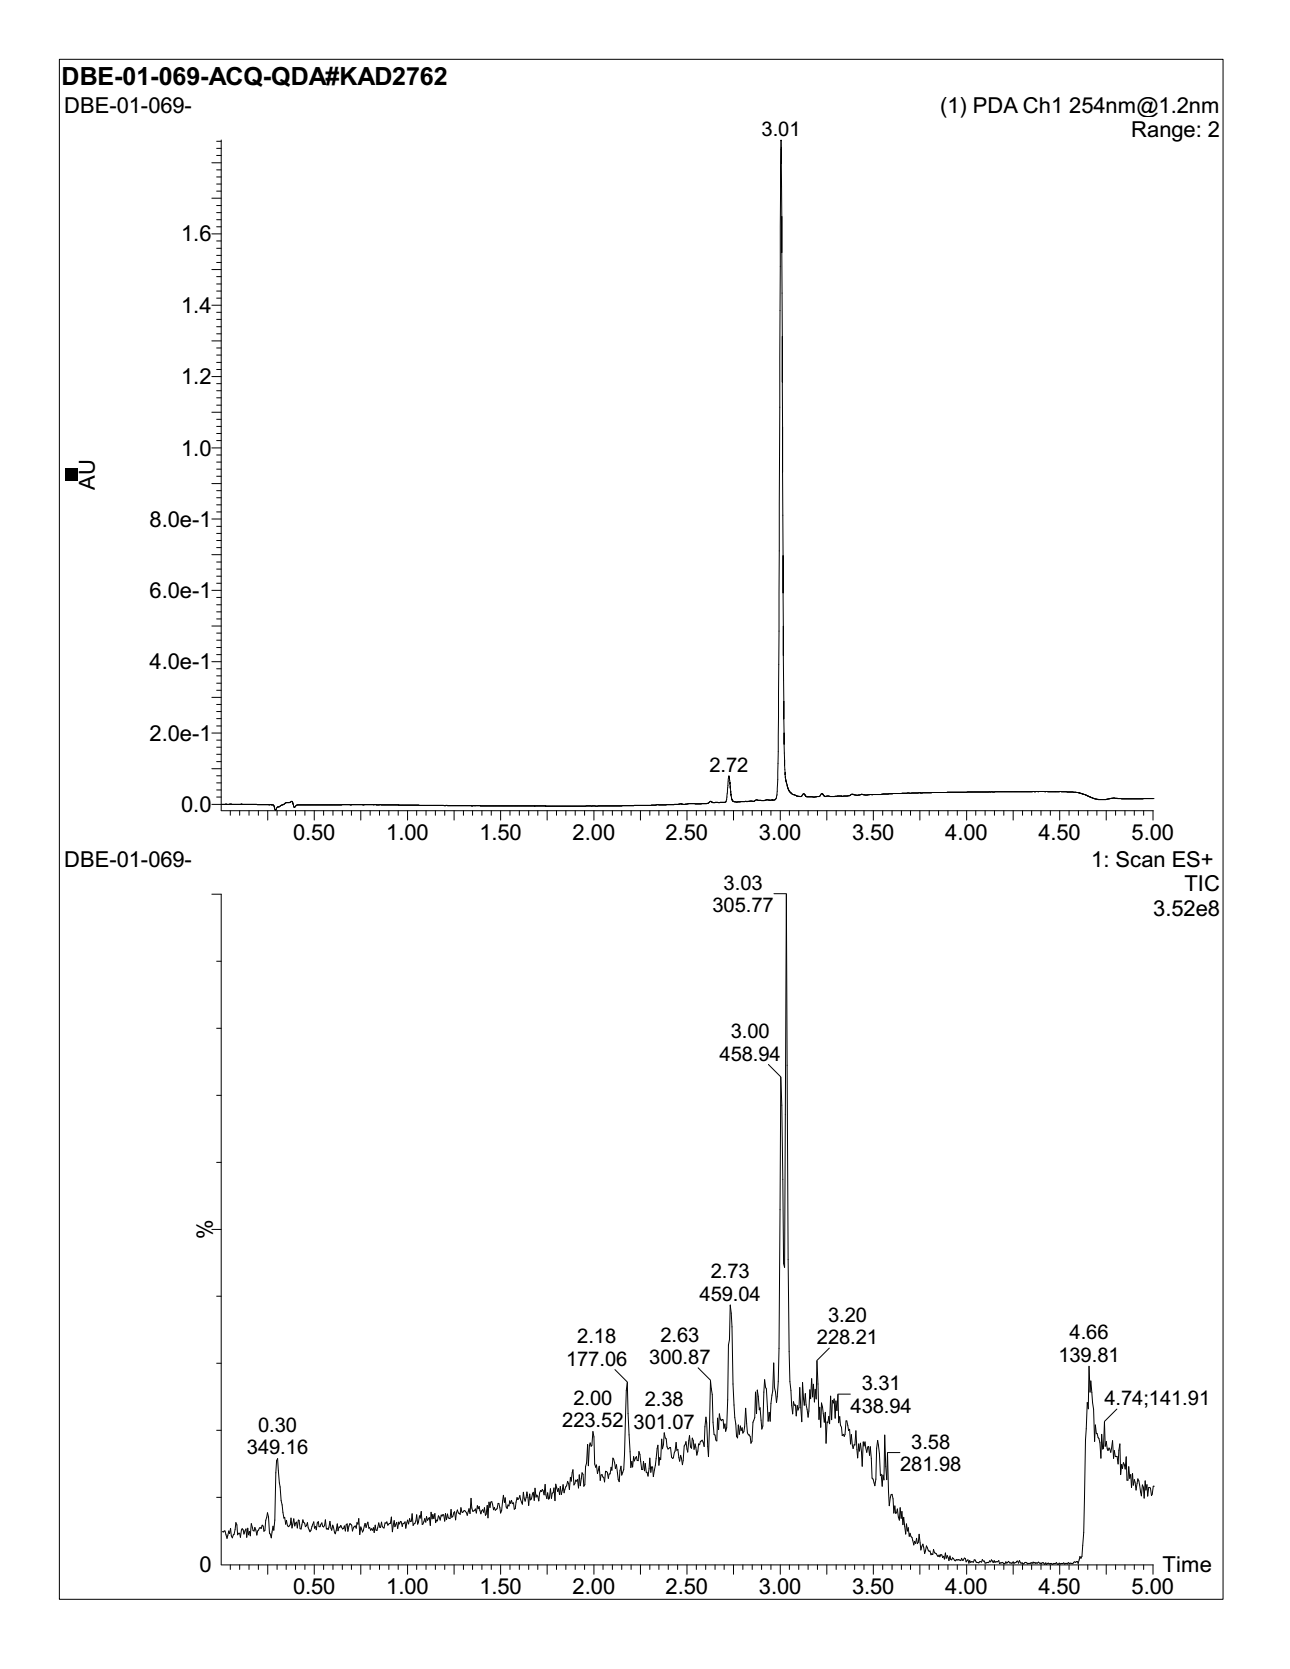


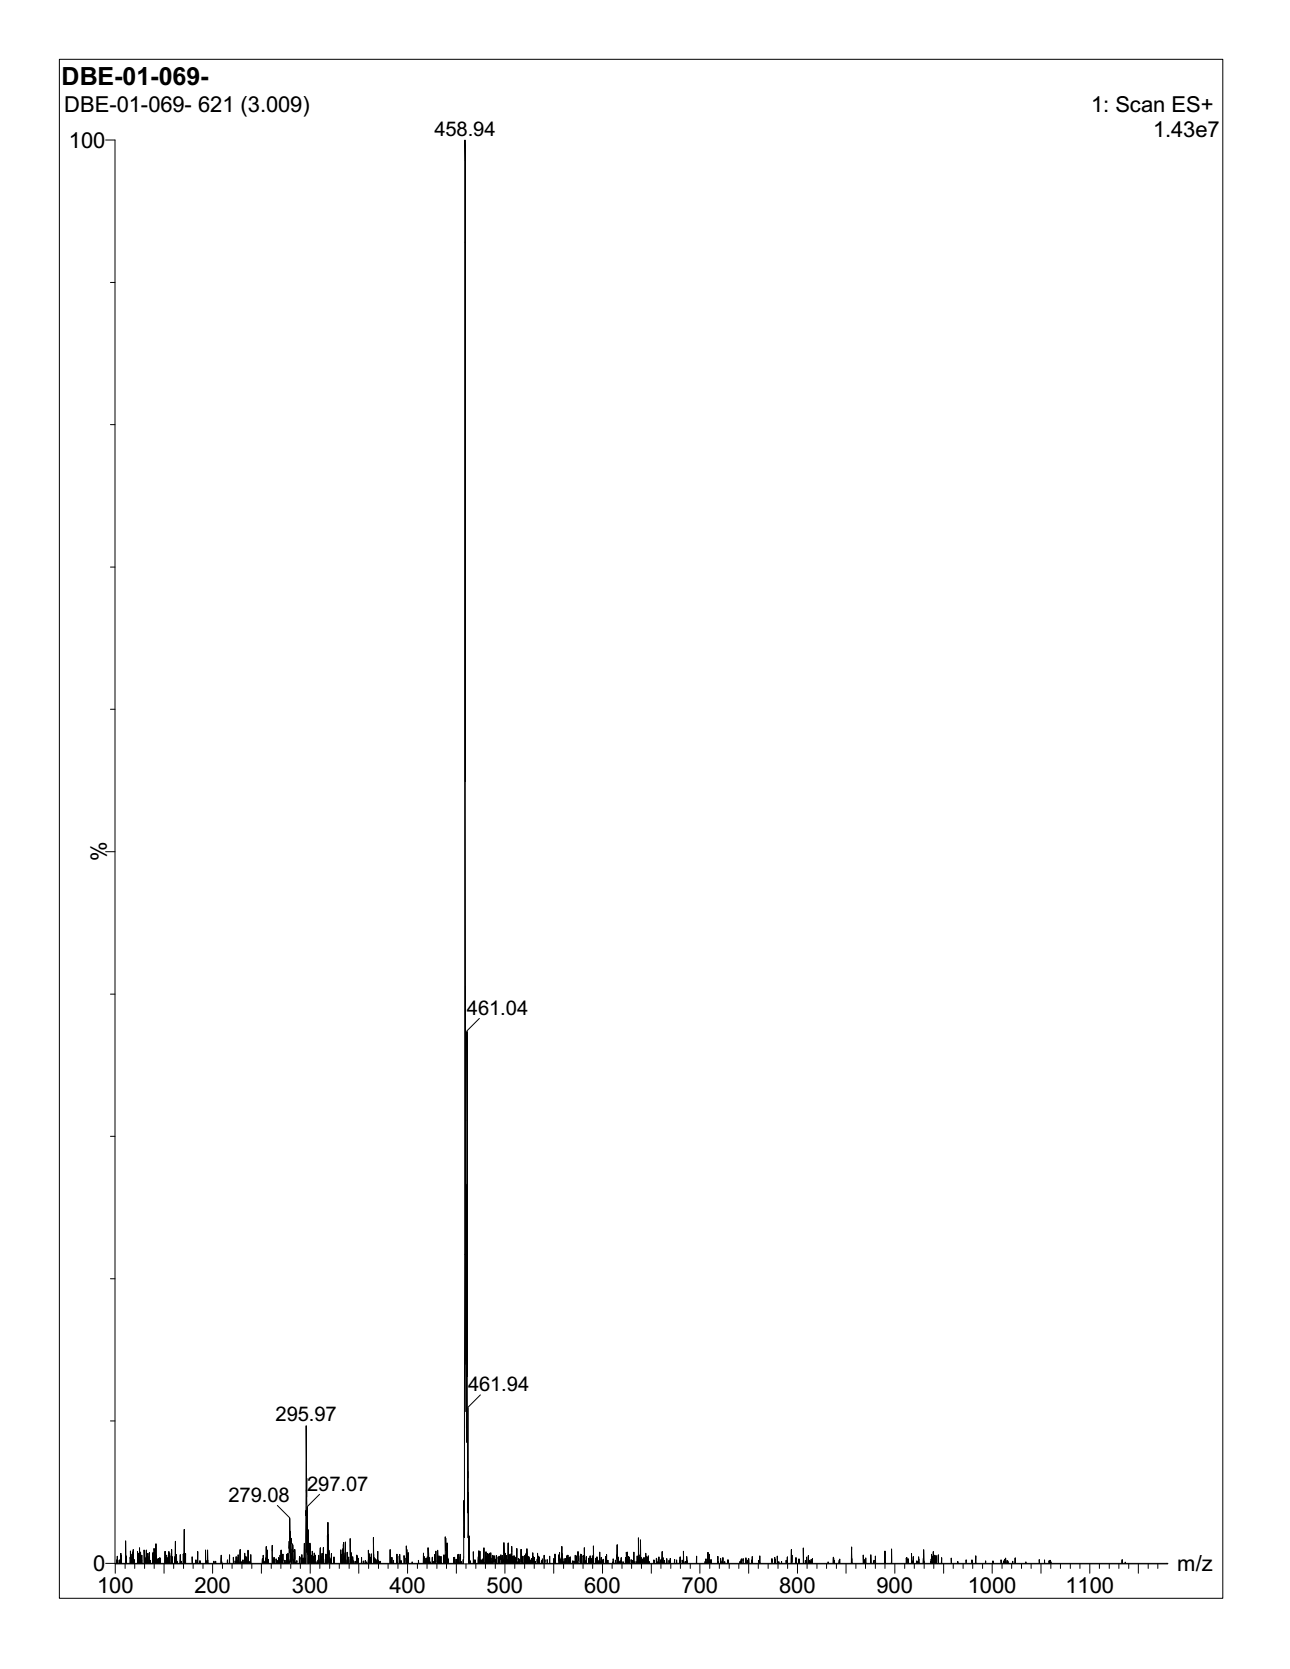


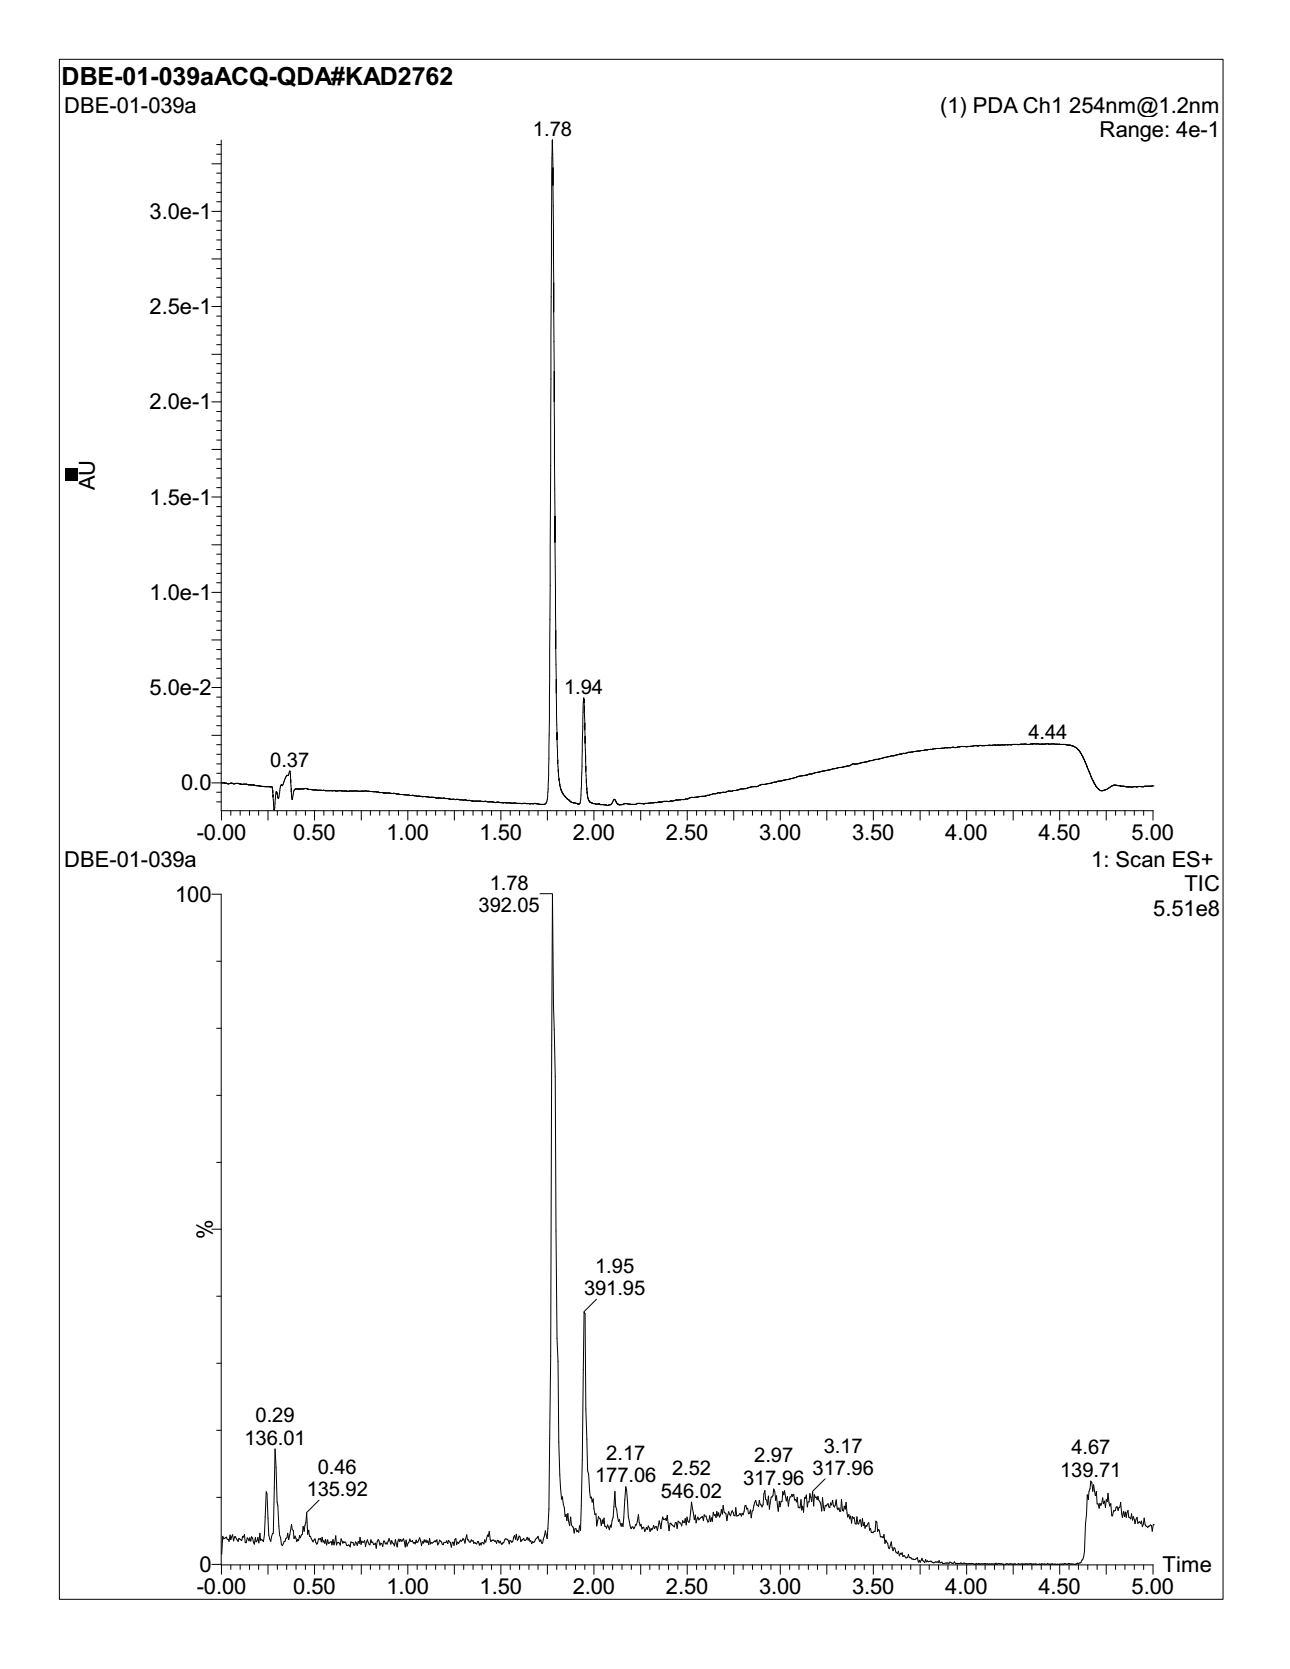


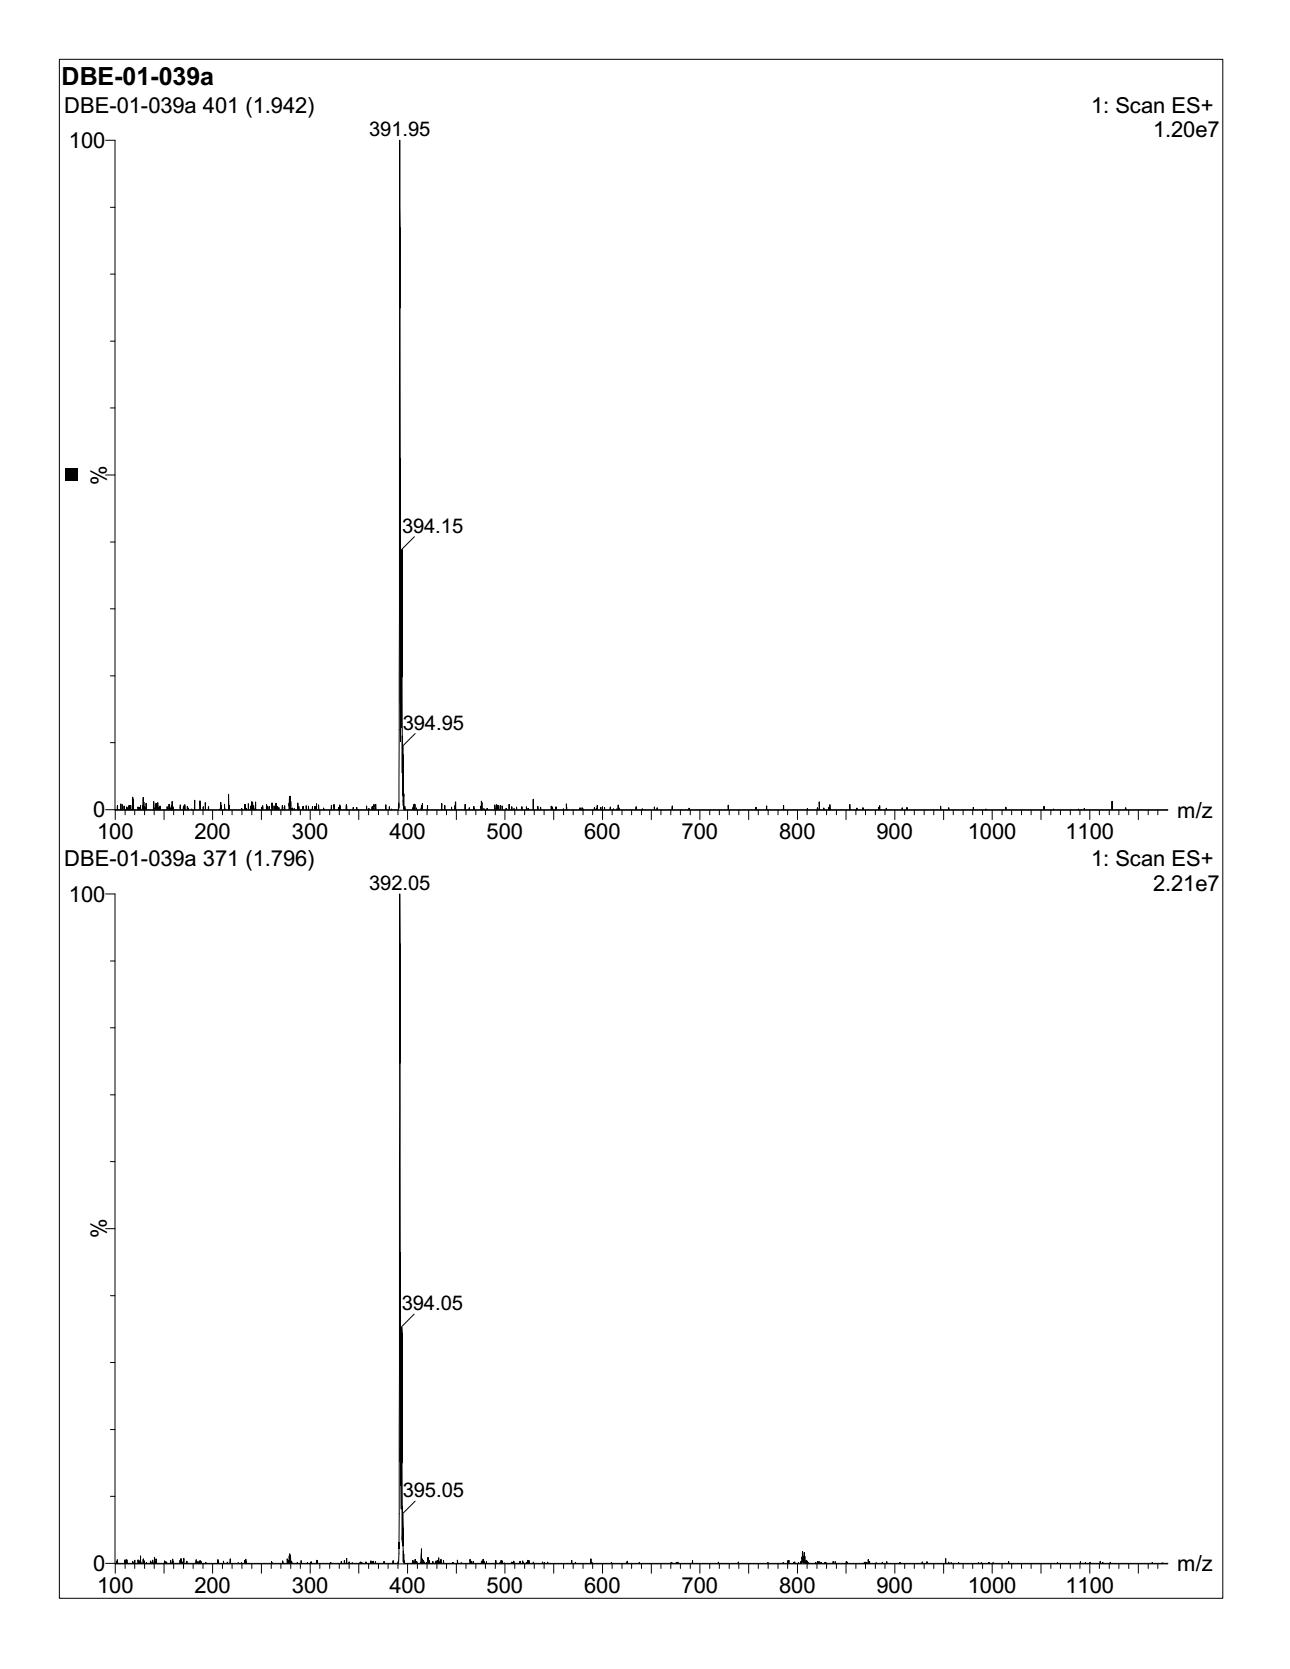


**PROTON-NMR**


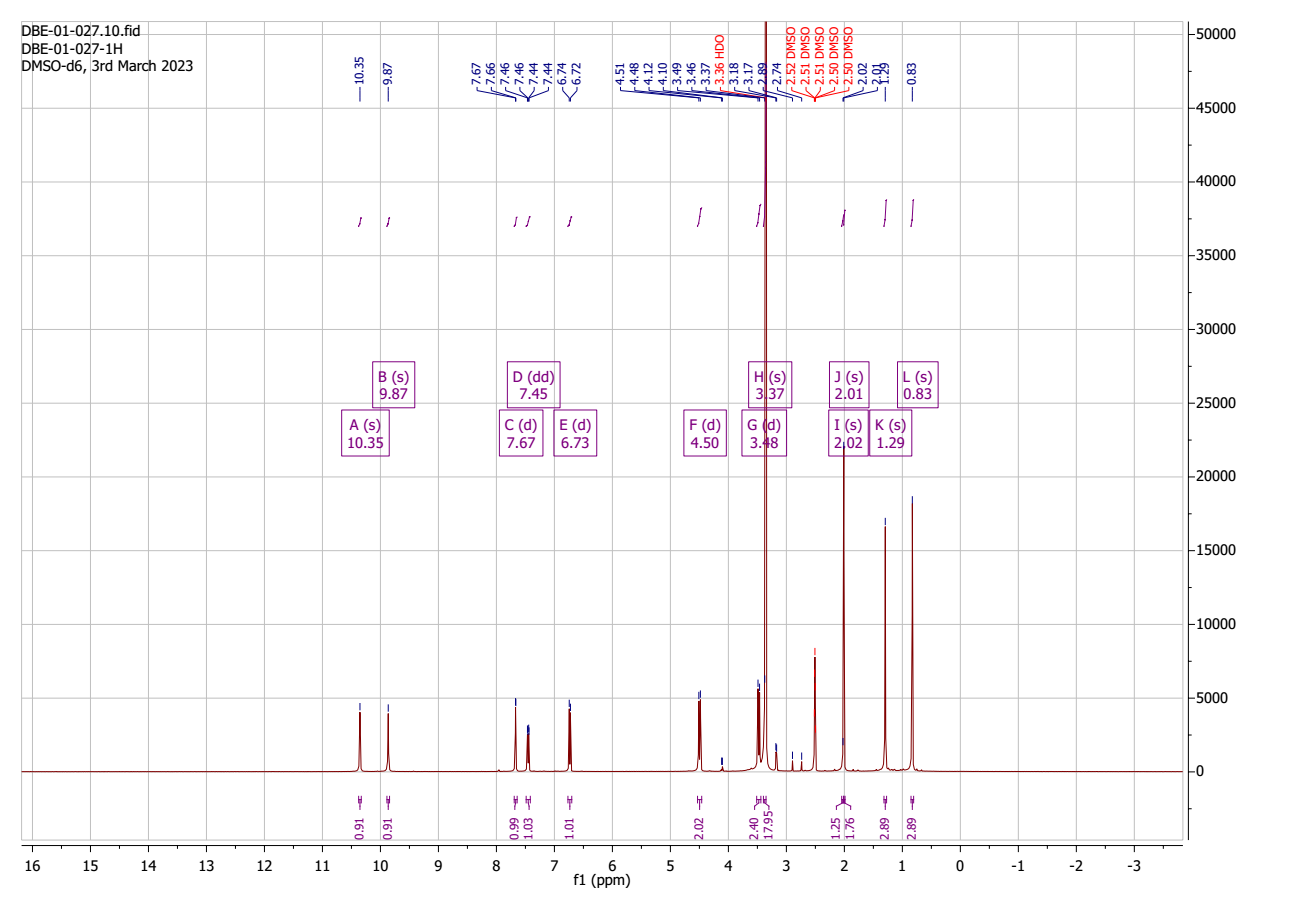


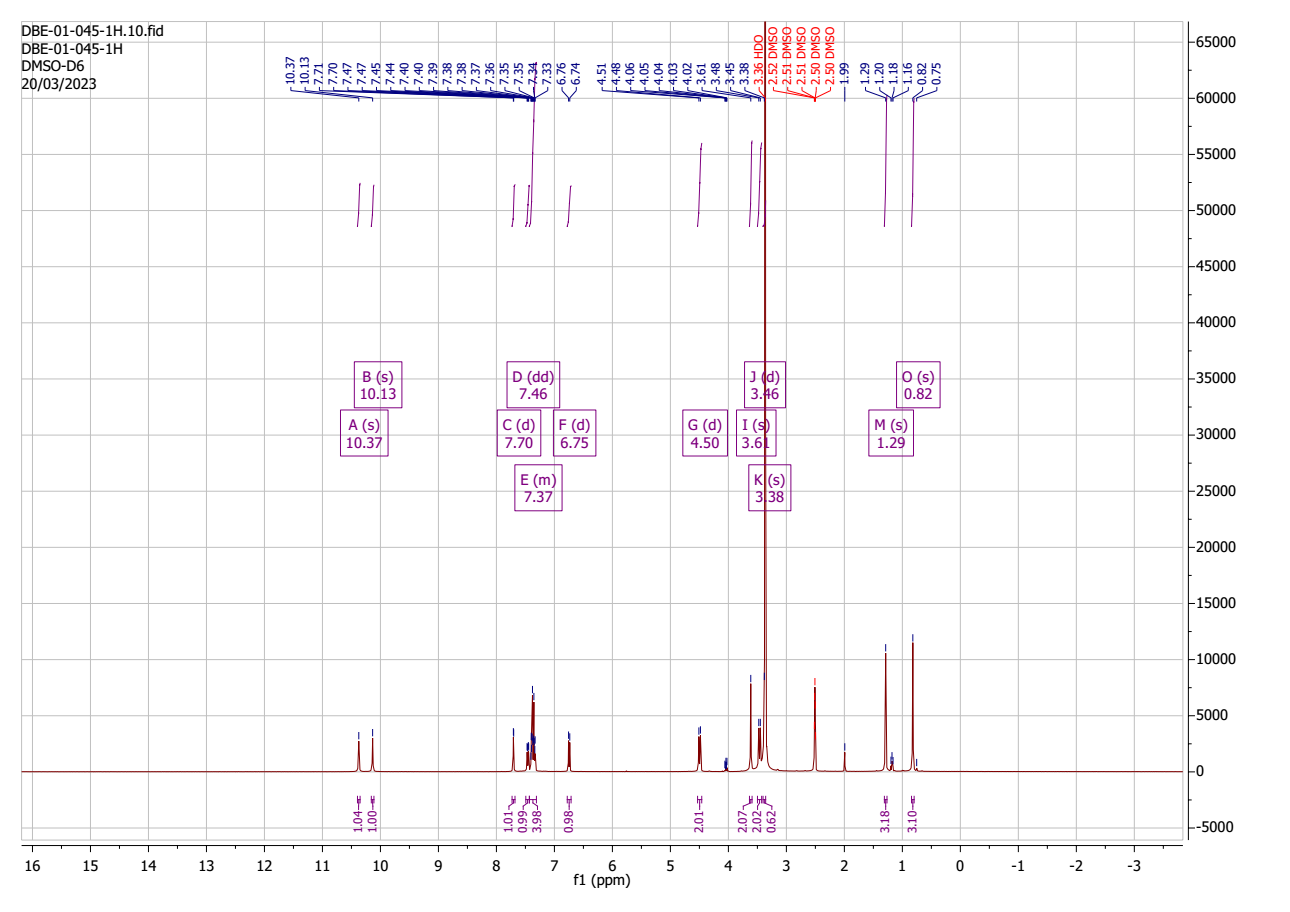


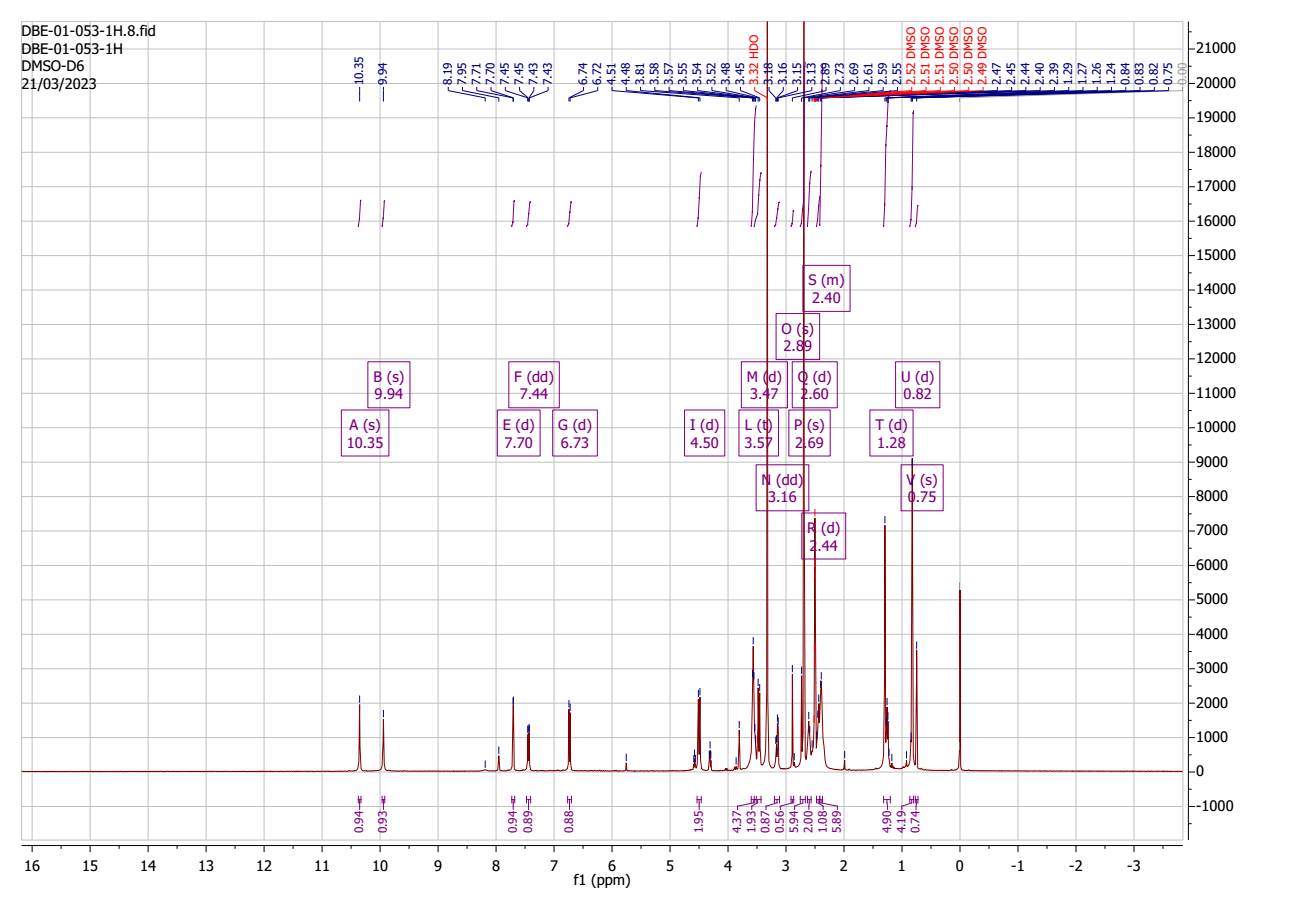


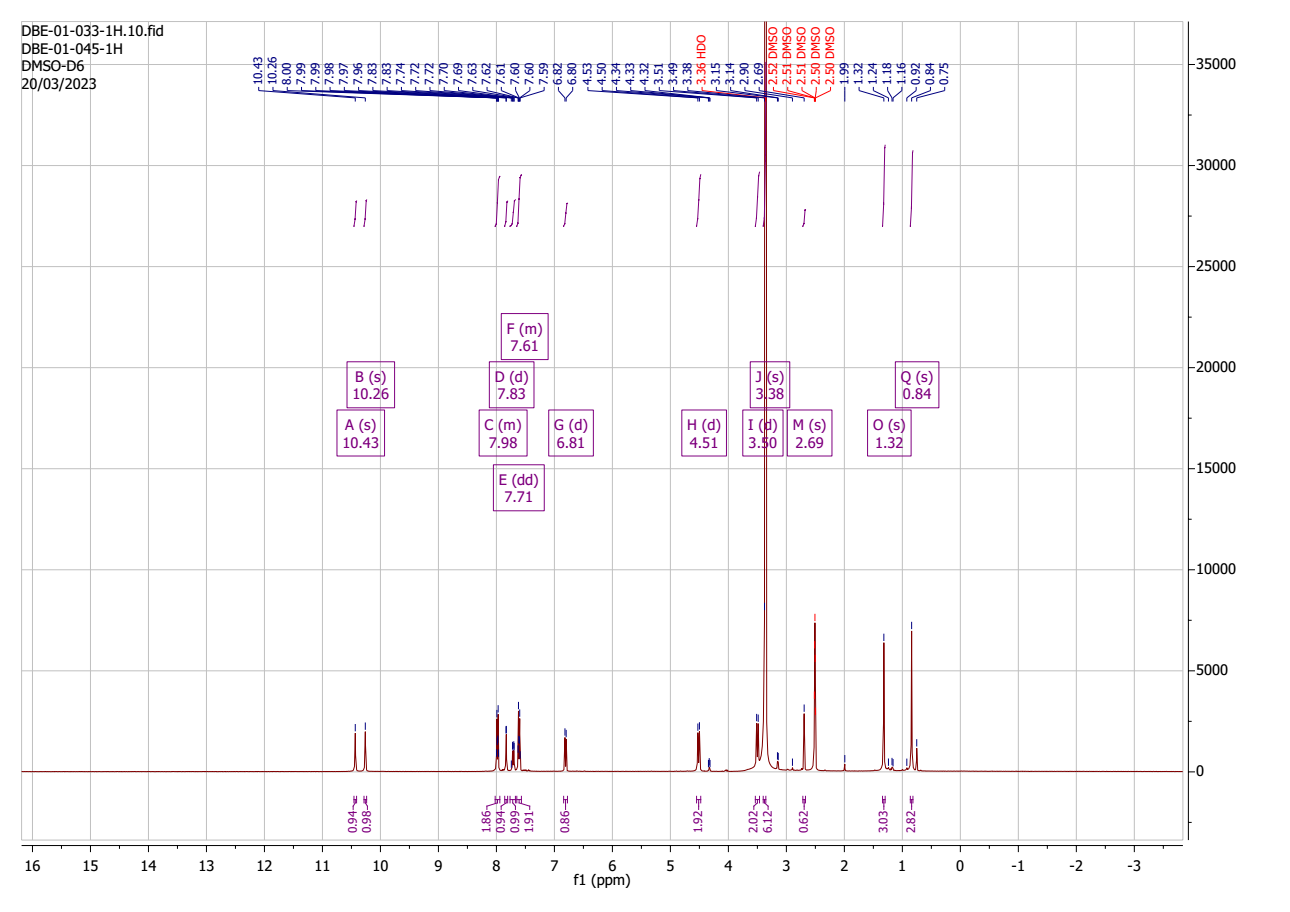


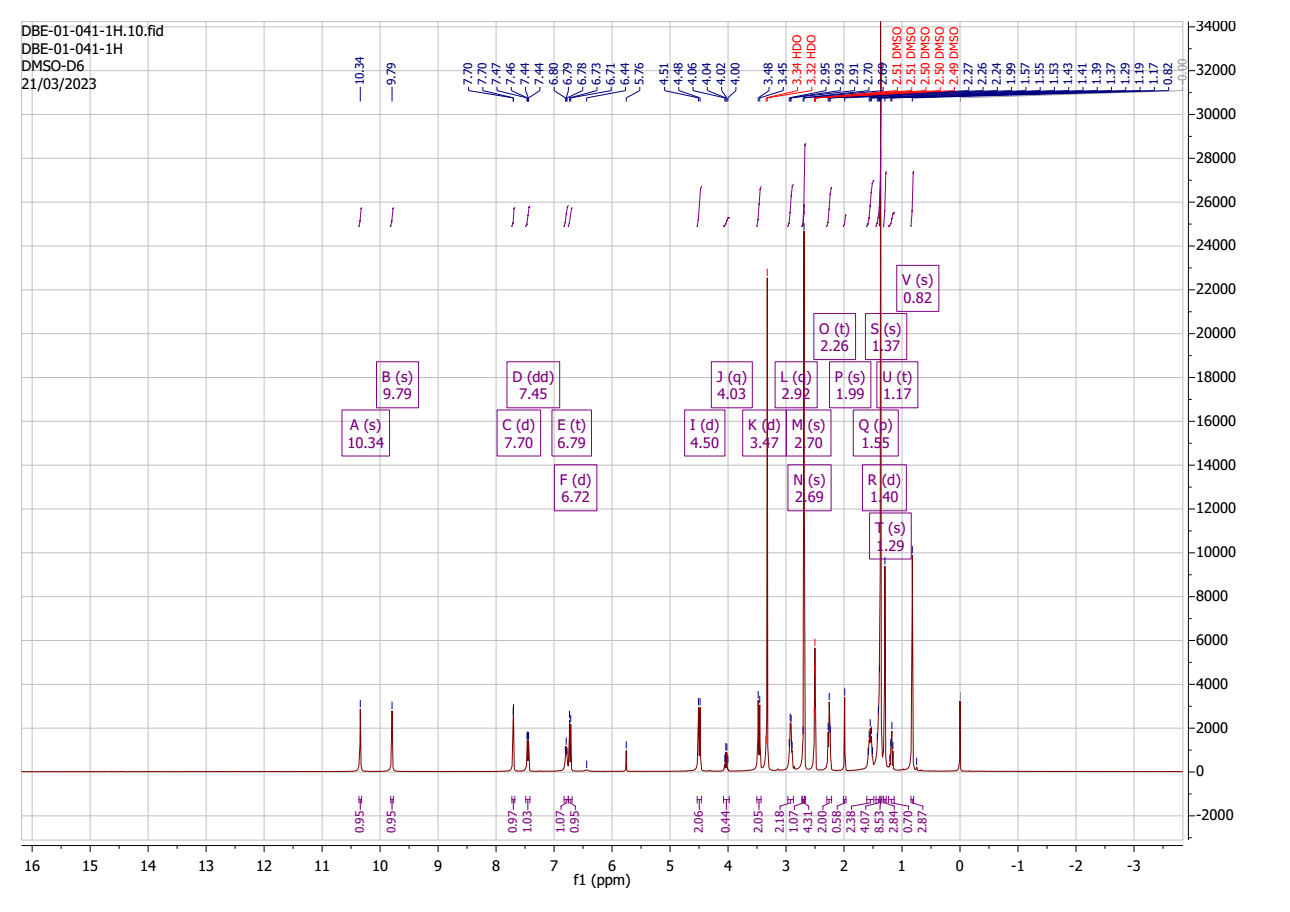


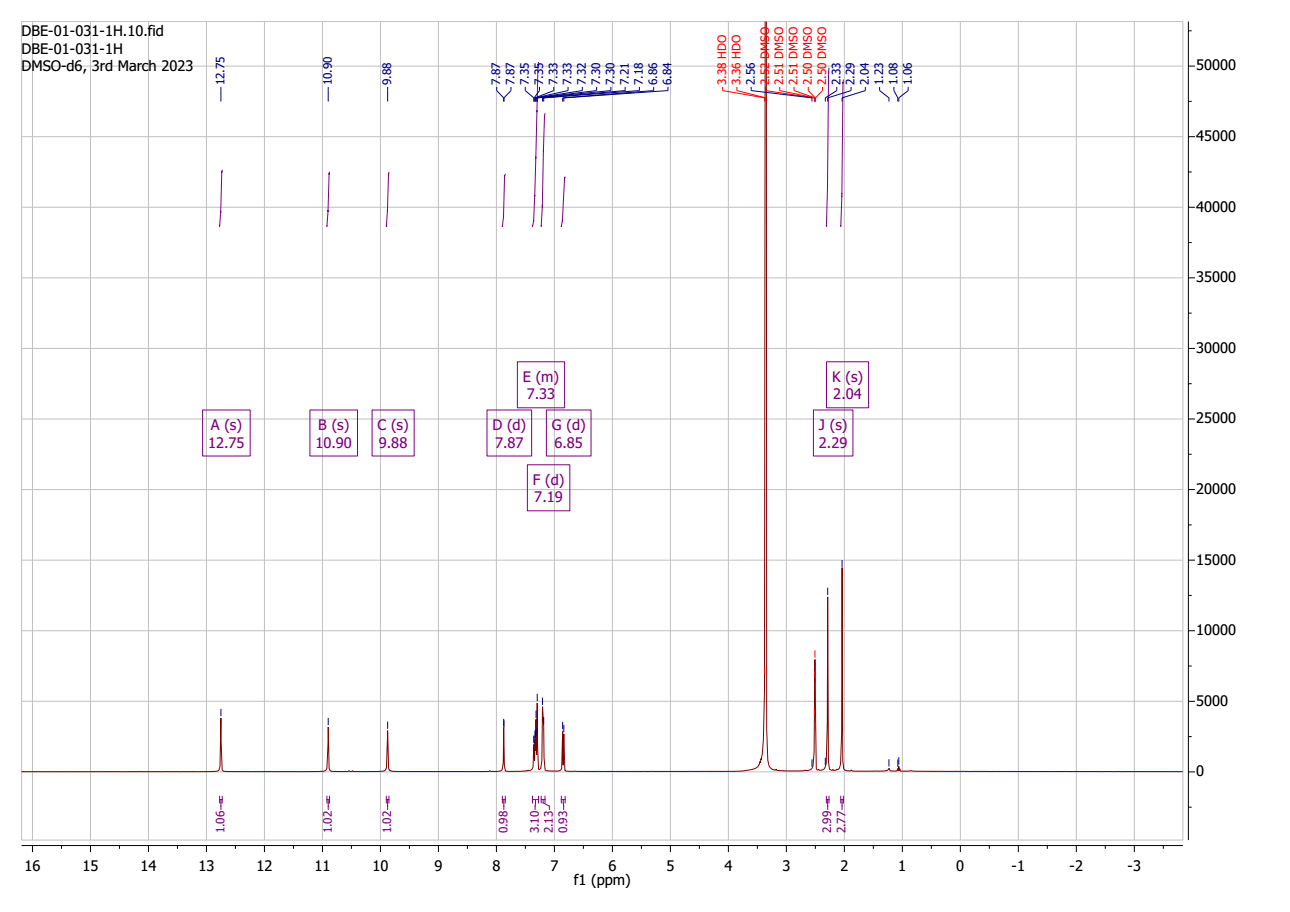


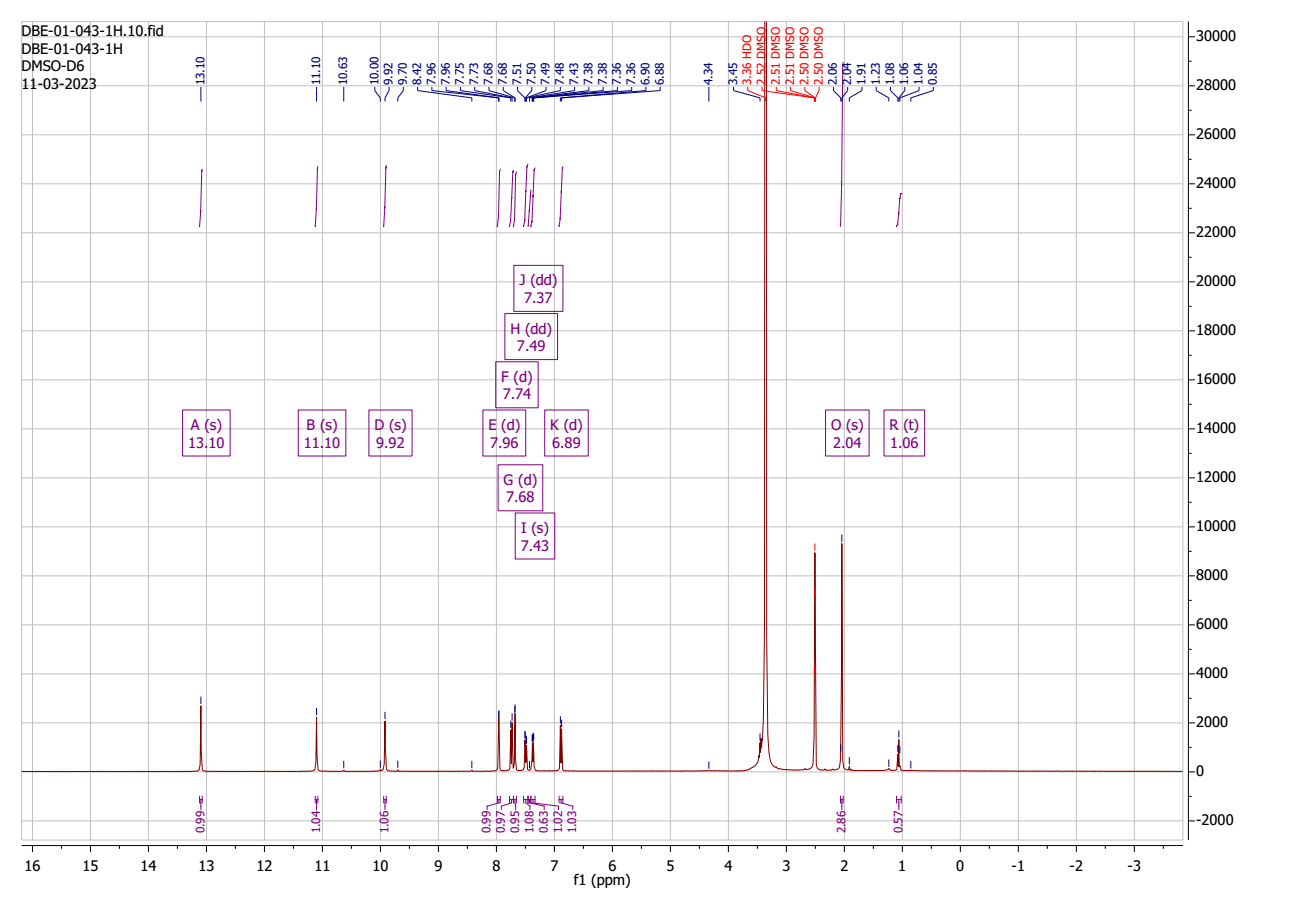


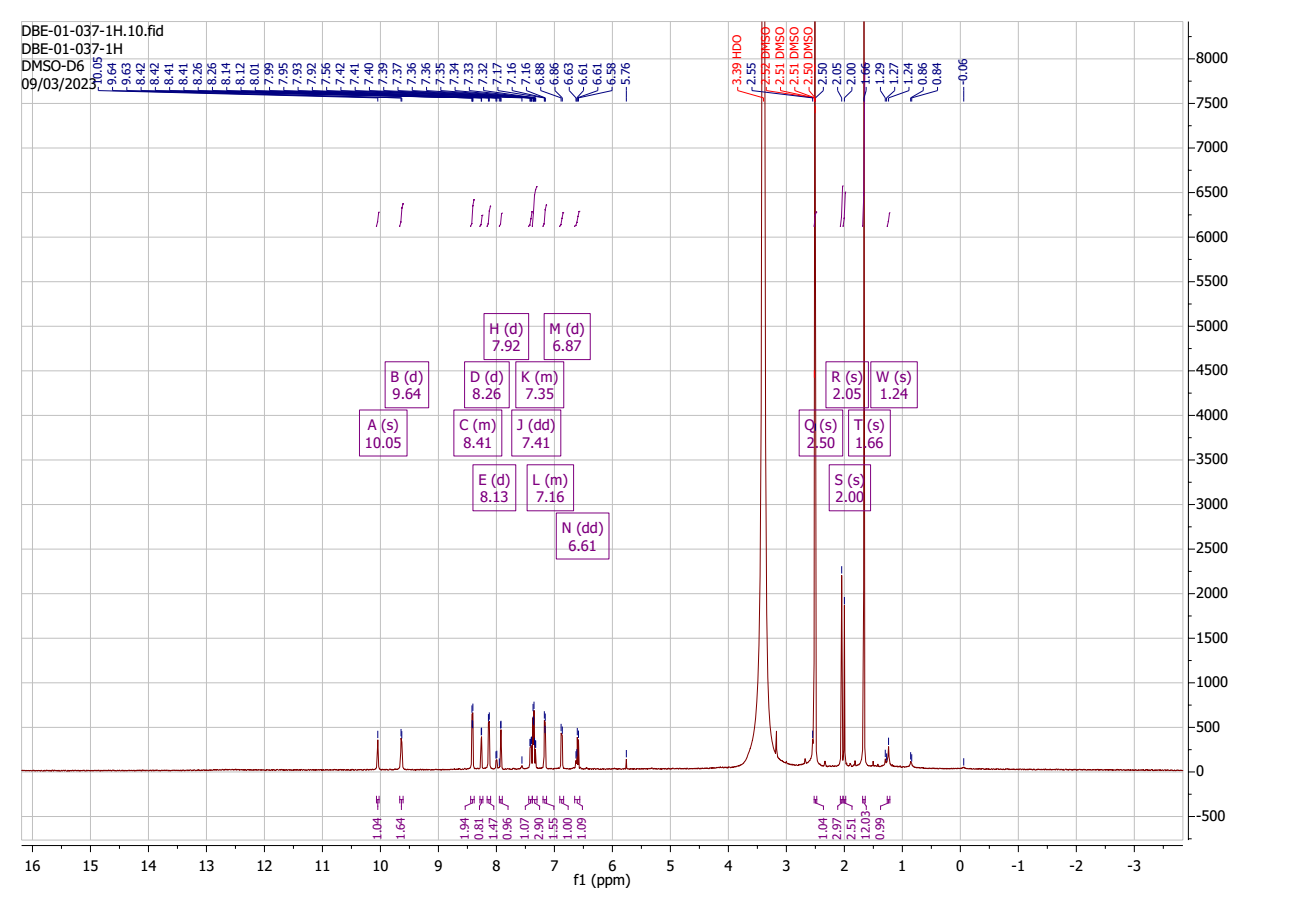


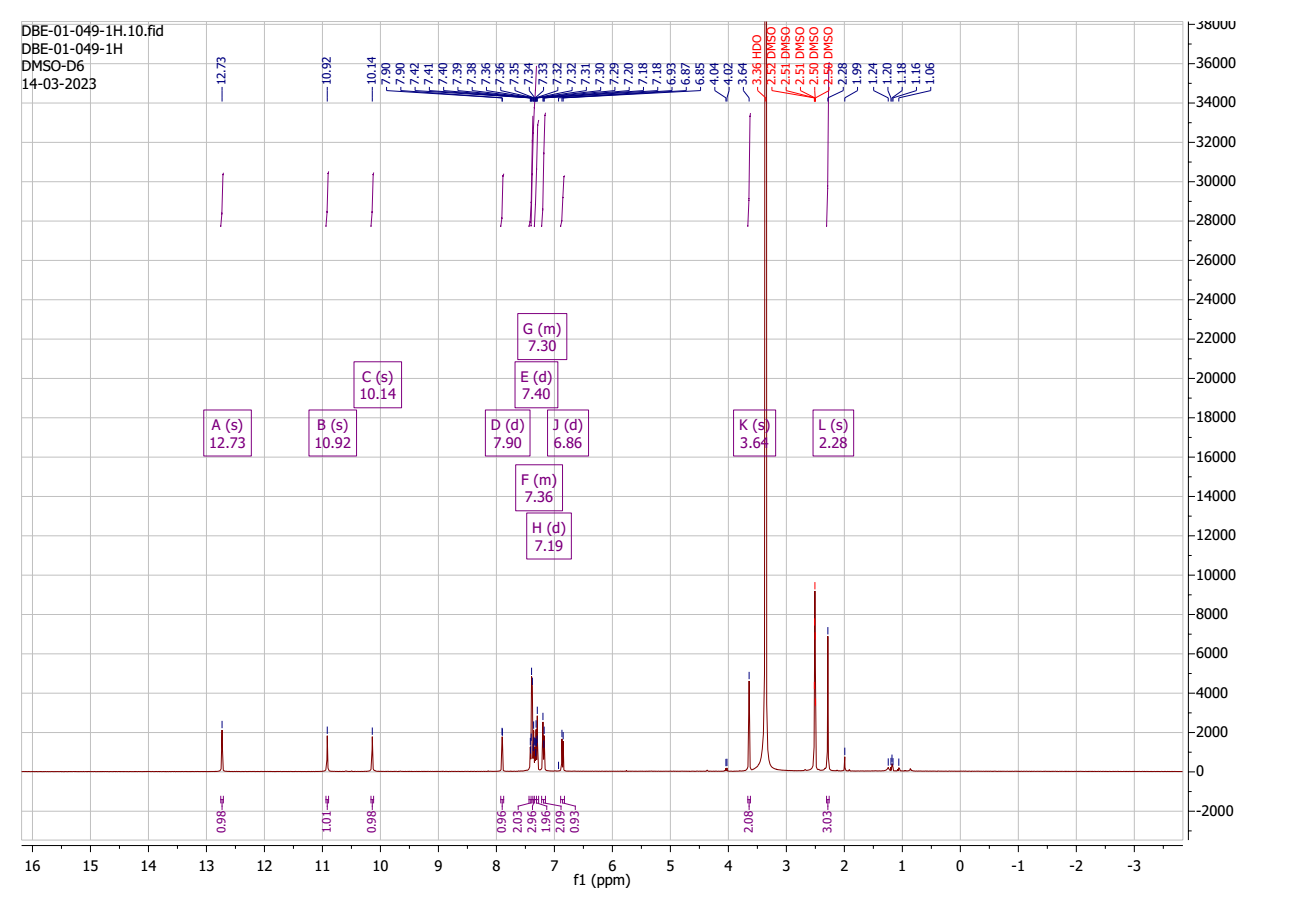


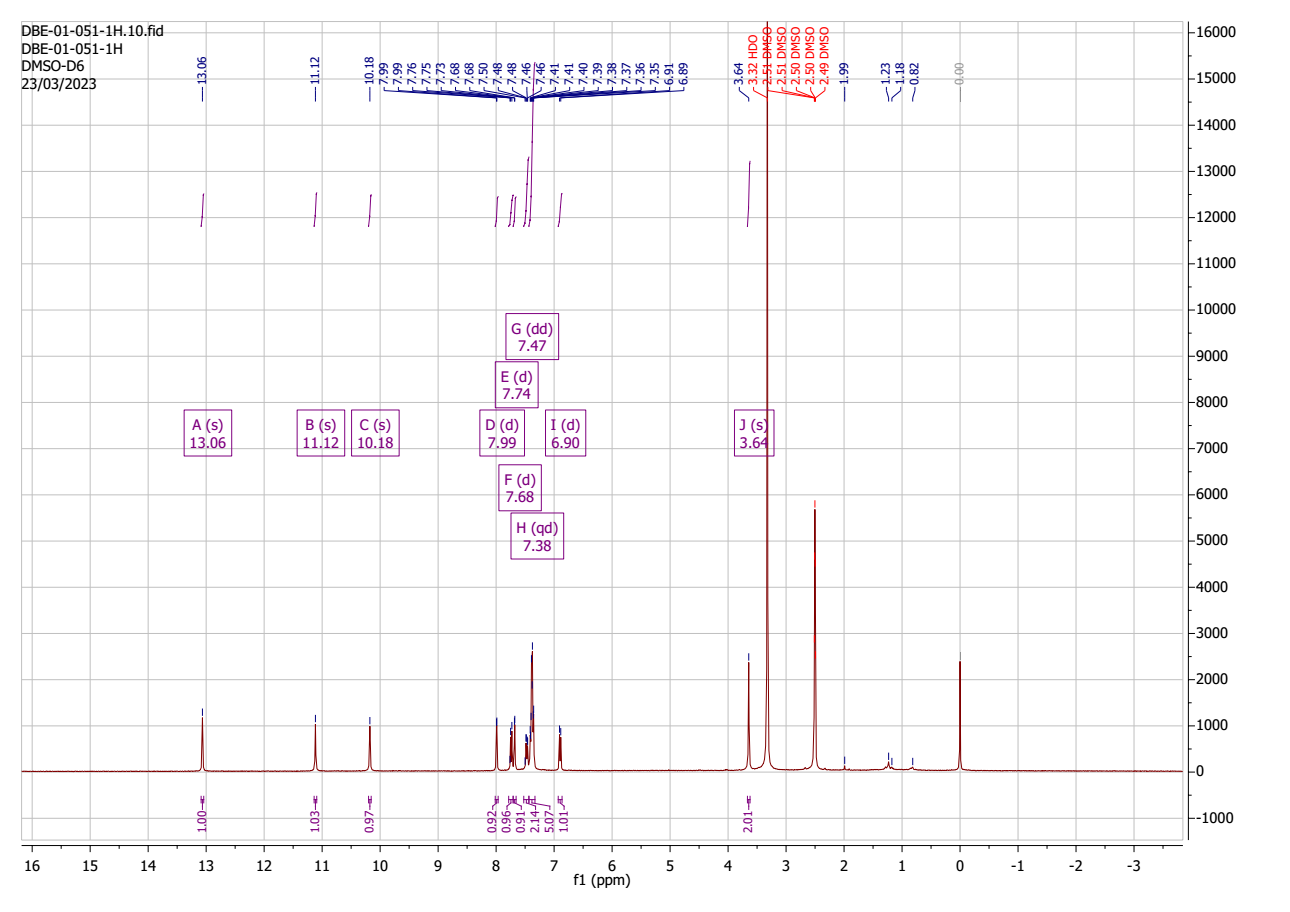


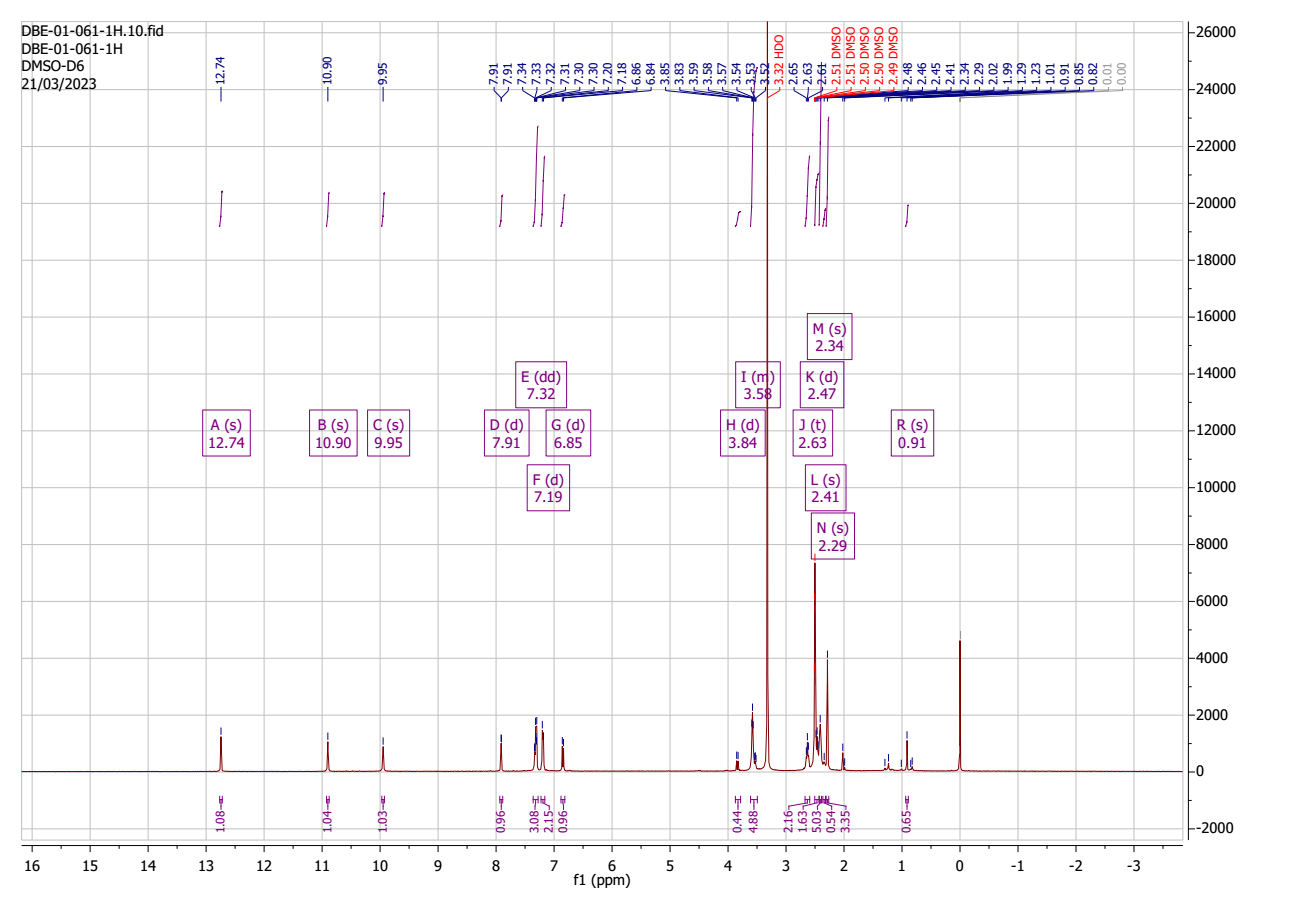


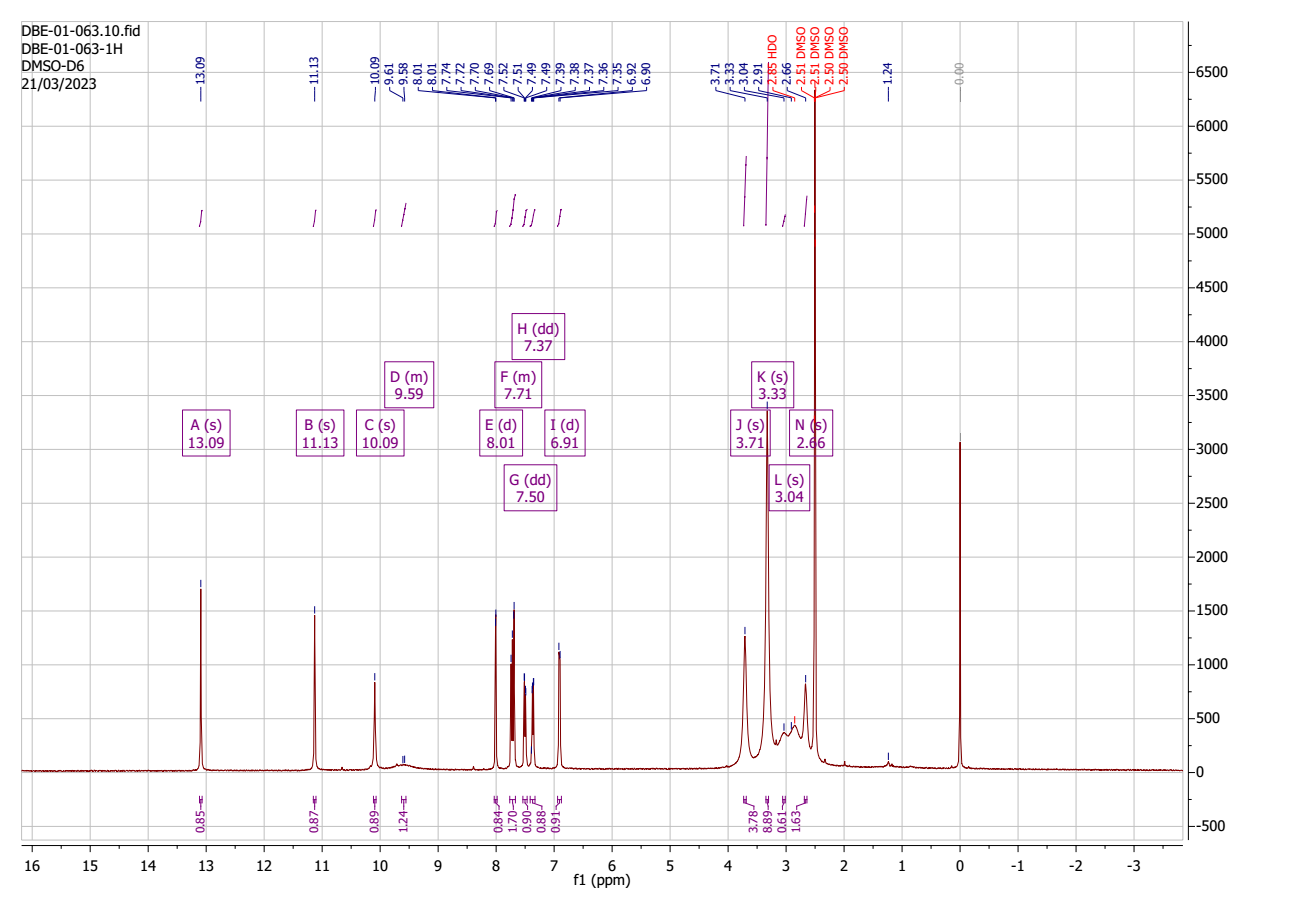


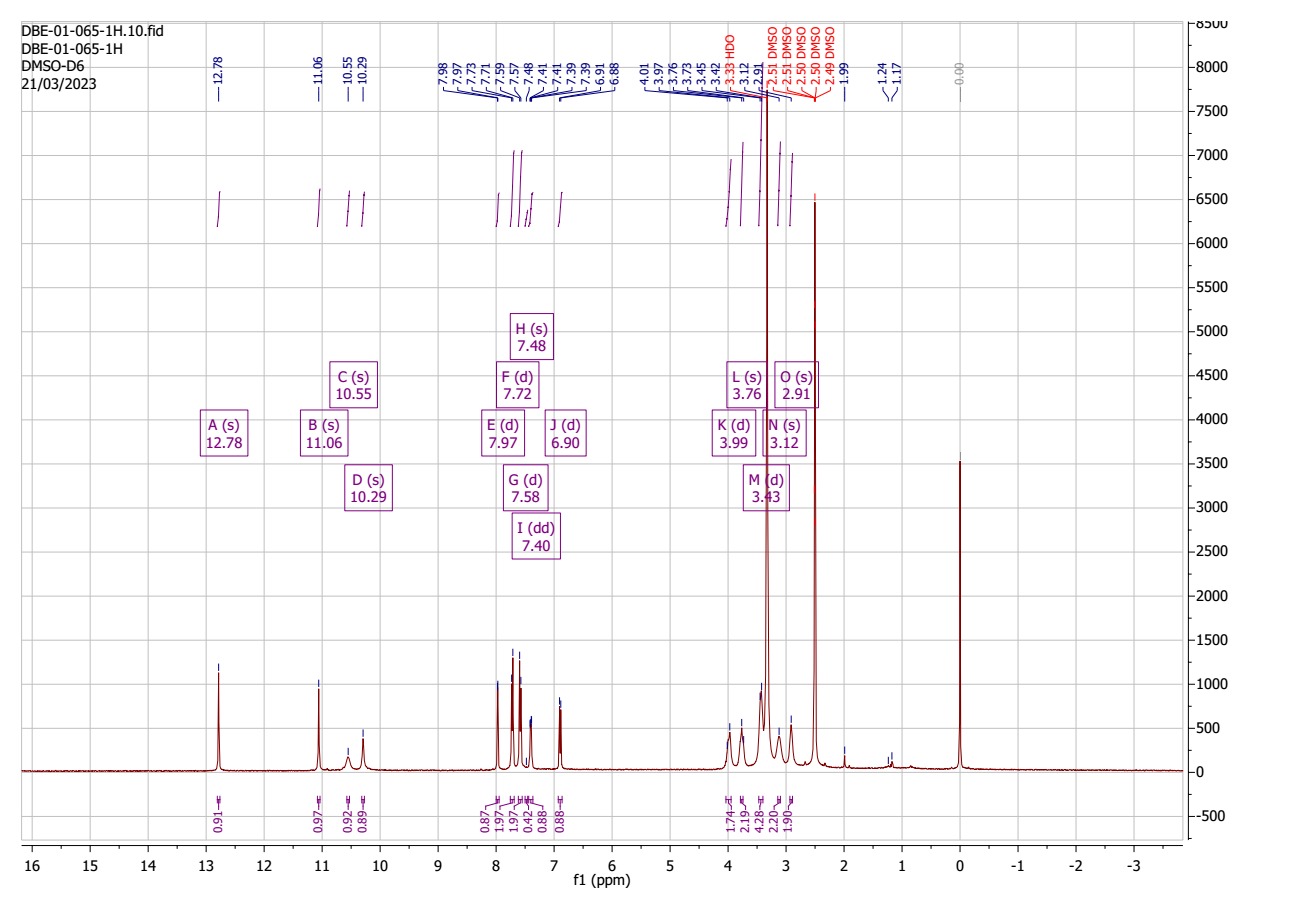


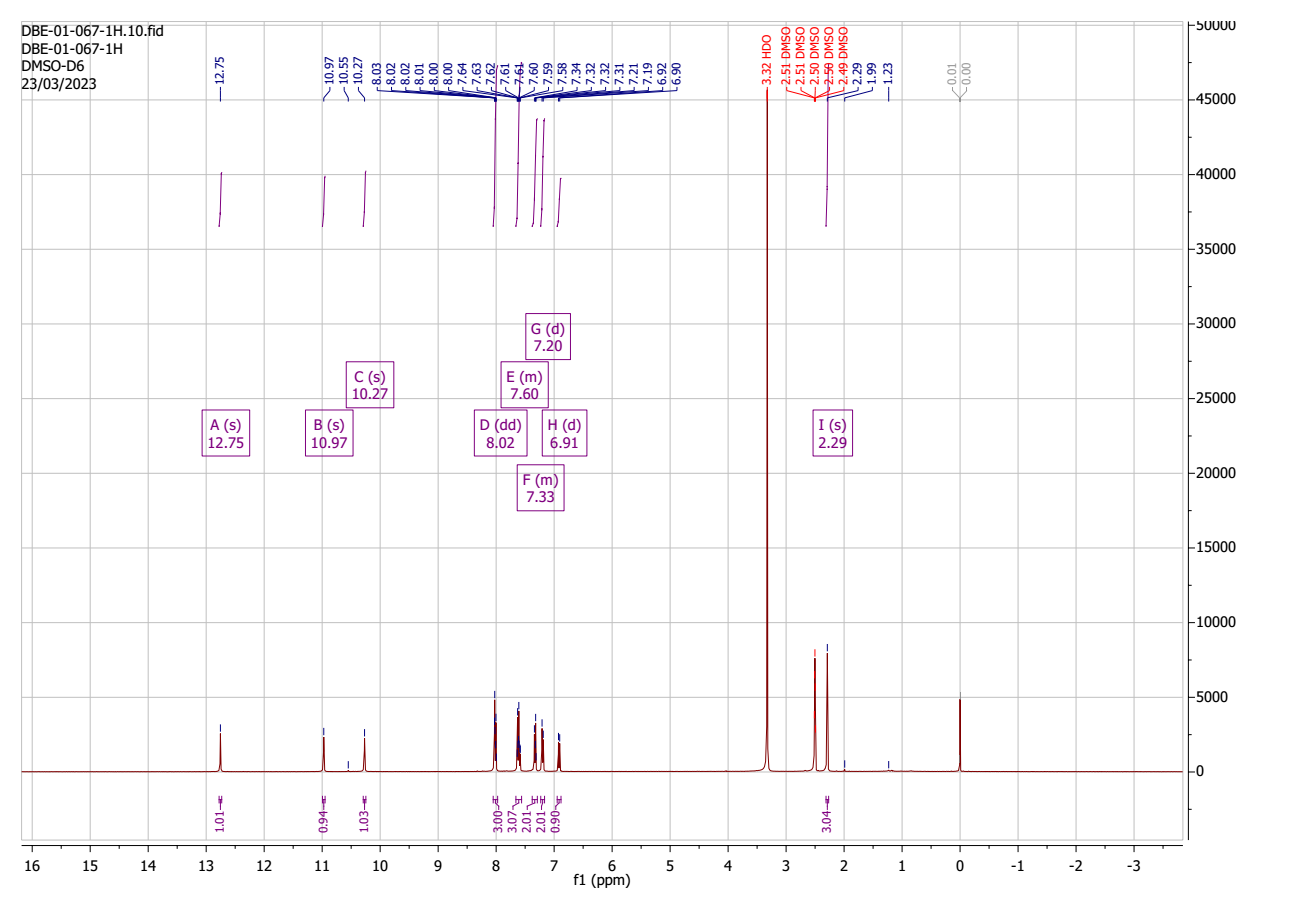


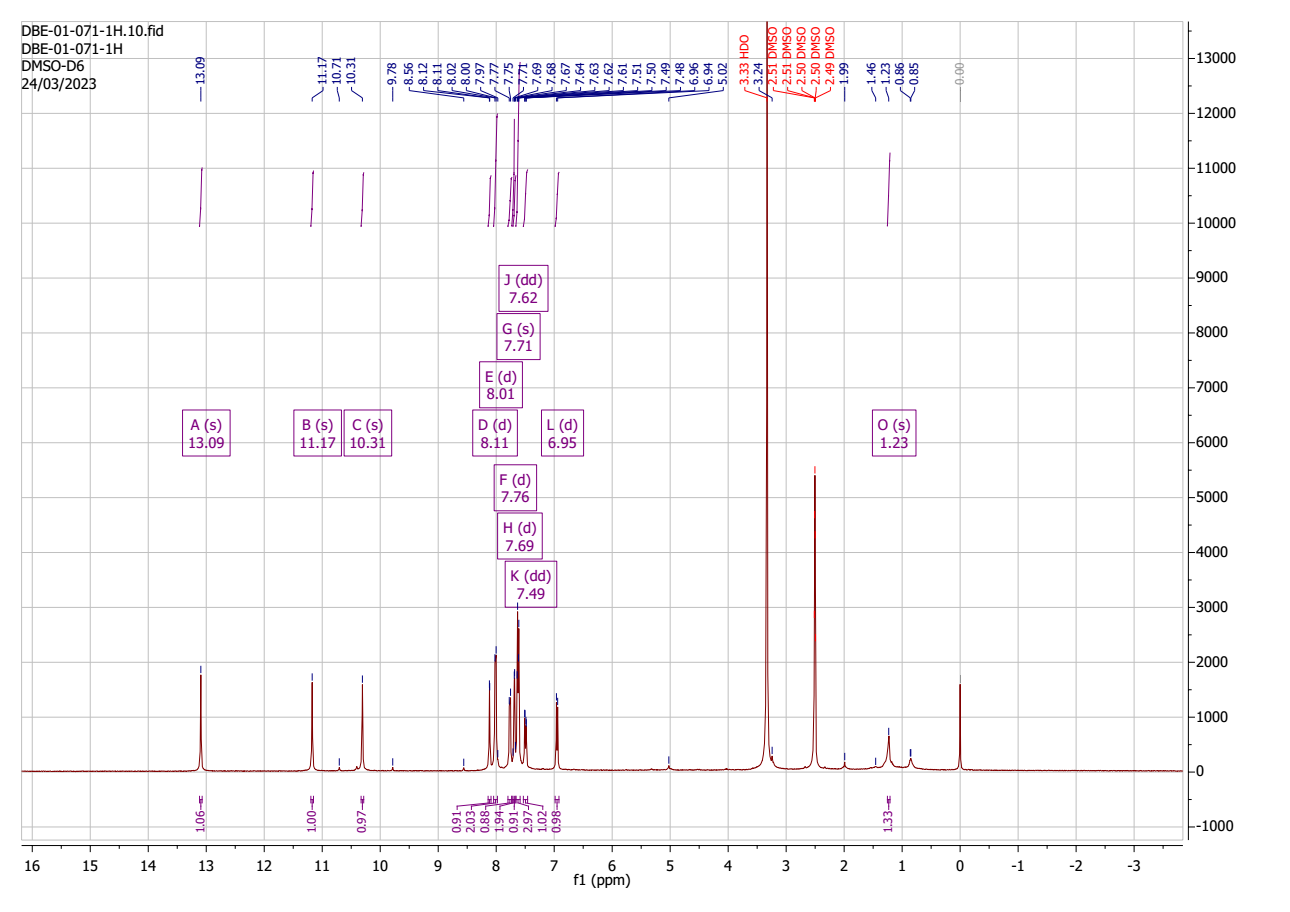


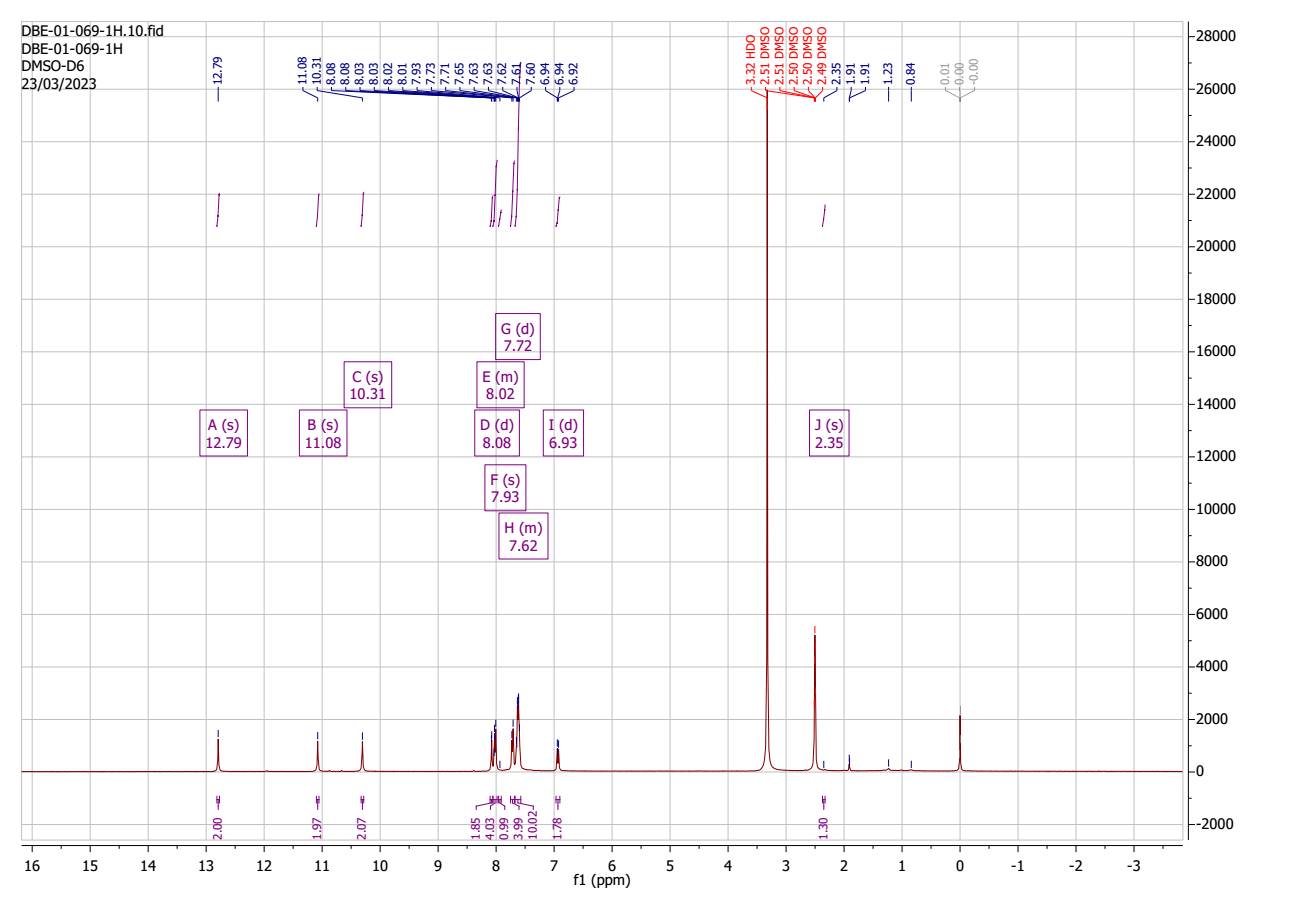


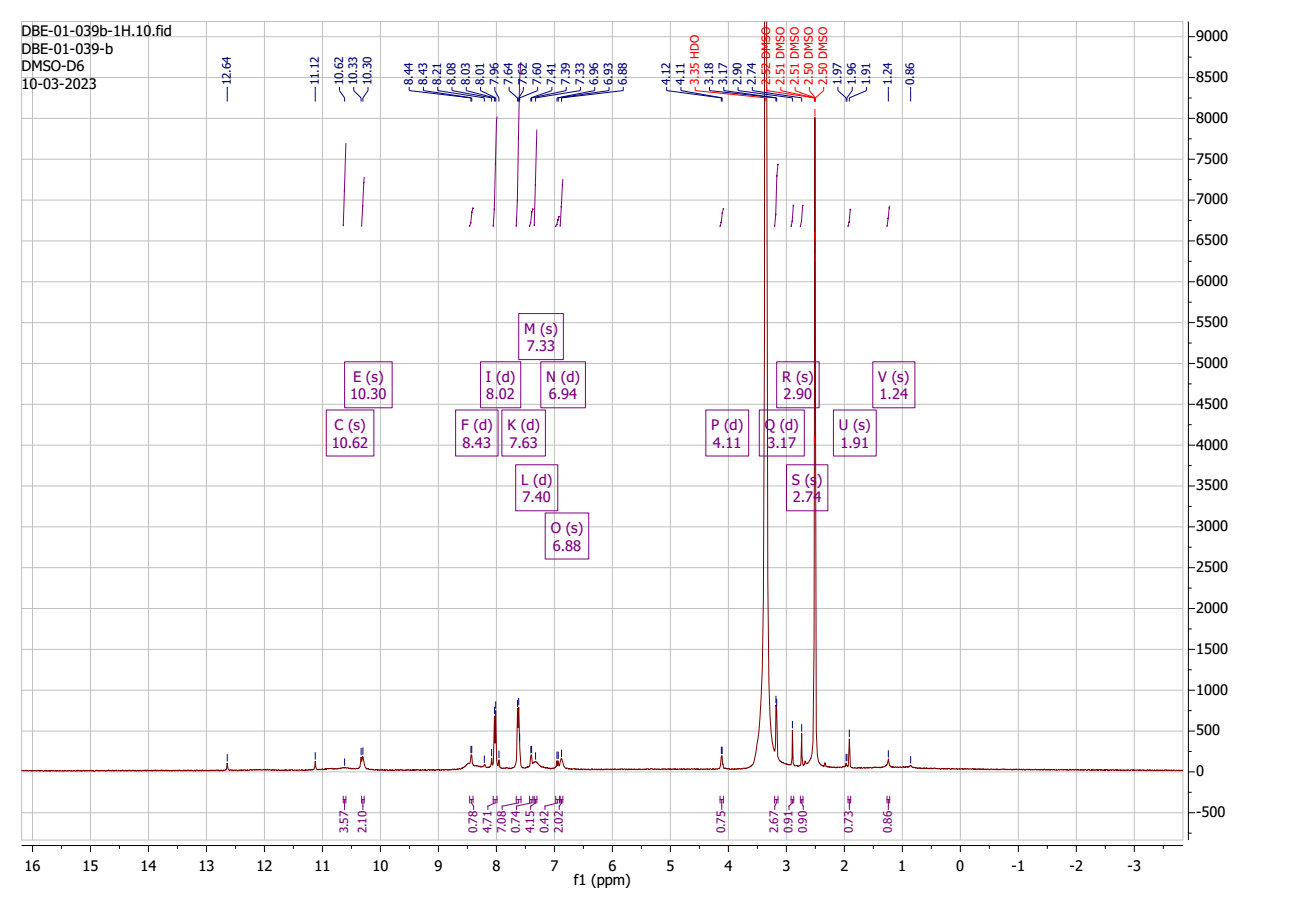

Supplement: Supplementary file 1 [file e868986c9d2ac1965c9133dc.docx]
